# Supplementary material for: Characterization of interstitial diffuse fibrosis patterns using texture analysis of myocardial native T1 mapping
Source: PLoS One. 2020 Jun 1;15(6):e0233694. doi: 10.1371/journal.pone.0233694 (PMC7263579; doi:10.1371/journal.pone.0233694)
Supplement: S1 Table — (DOCX) [file pone.0233694.s001.docx]

S1 Table: Tissue features comparison of healthy, HCM and DCM subjects (median [1st quartile; 3rd quartile]).

| **Features** | **Healthy** | **HCM** | **DCM** | **P-value** |
| --- | --- | --- | --- | --- |
| LBP(8) | 21.25 [19.51; 22.07] ×10-4 | 12.43[20.16; 16.93]  ×10-4 | 25.48[24.47; 57.66]  ×10-4‡§ | <0.001 |
| LBP(36) | 5.80[4.89; 10.27]  ×10-4 | 6.21[10.07; 24.60]  ×10-4‡ | 9.44[8.78; 15.91]  ×10-4‡§ | <0.001 |
| GLN(135o) | 21.73[28.67; 62.04]  ×102 | 39.49[33.28; 71.00]  ×102‡ | 40.71[44.72; 74.77]  ×102‡§ | <0.001 |
| LBP(26) | 25.43[26.84; 59.07]  ×10-4 | 29.12[30.73; 62.01]  ×10-4‡ | 41.42[32.81; 97.59]  ×10-4‡§ | <0.001 |
| SRHGE(45o) | 7.30[11.93; 38.54]  ×10-3 | 7.92[7.92; 23.81]  ×10-3‡ | 7.98[6.67; 43.66]  ×10-3‡§ | <0.001 |
| LBP(21) | 7.58[8.22; 35.48]  ×10-3 | 8.32[8.00; 46.50]  ×10-3‡ | 10.85[8.25; 40.54]  ×10-3‡ | <0.001 |
| Variance | 7.27[15.06; 12.50]  ×102 | 6.36[15.49; 14.60]  ×102‡ | 14.66[16.63; 25.04]  ×102‡§ | <0.001 |

‡ P<0.001 when compared with Healthy Control subgroup

† P<0.01 when compared with Healthy Control subgroup

§ P<0.001 when compared with HCM subgroup

ǁ P<0.01 when compared with HCM subgroup
