# Supplementary material for: Characterization of interstitial diffuse fibrosis patterns using texture analysis of myocardial native T1 mapping
Source: PLoS One. 2020 Jun 1;15(6):e0233694. doi: 10.1371/journal.pone.0233694 (PMC7263579; doi:10.1371/journal.pone.0233694)
Supplement: S2 Data — (XLSX) [file pone.0233694.s006.xlsx]

## Sheet: sheet1
	BOX-plots for the 7 selected features
			1.1	1.85	2.6
				0.75		0.25
Features				1					2					3					4					5					6					7
	0.9	1		0.00523773	-0.4375	0.790625			0.00381072	-0.4375	0.790625			15730	-0.4375	0.790625			0.0292432	-0.4	0.8			0.895922	-0.416667	0.795833			0.154633	-0.428571	0.792857			2770.64	-0.464286	0.783929
	0.9	1		0.00556226	-0.3125	0.821875			0.00364504	-0.3125	0.821875			14956.7	-0.4	0.8			0.030055	-0.4	0.8			0.888312	-0.444444	0.788889			0.140914	-0.4375	0.790625			2864.99	-0.392857	0.801786
	0.9	1		0.00692268	-0.416667	0.795833			0.00637882	0	0.9			17600.7	-0.428571	0.792857			0.0354563	0	0.9			0.906109	-0.4375	0.790625			0.163397	-0.416667	0.795833			3479.67	-0.482759	0.77931
	0.9	1		0.00495095	-0.4	0.8			0.00333024	-0.428571	0.792857			20528.6	-0.333333	0.816667			0.026062	-0.461538	0.784615			0.900266	-0.333333	0.816667			0.142074	-0.3125	0.821875			5301.73	-0.4375	0.790625
	0.9	1		0.00215548	-0.4	0.8			0.00218702	-0.25	0.8375			19012.9	-0.444444	0.788889			0.0204619	-0.25	0.8375			0.866891	-0.25	0.8375			0.148171	-0.428571	0.792857			2645.5	-0.321429	0.819643
	0.9	1		0.00746055	-0.416667	0.795833			0.00294917	-0.45	0.7875			18797.9	-0.333333	0.816667			0.0251176	-0.25	0.8375			0.898687	-0.25	0.8375			0.155577	-0.444444	0.788889			4231.54	-0.448276	0.787931
	0.9	1		0.00877506	-0.25	0.8375			0.00381072	-0.1875	0.853125			16817	-0.428571	0.792857			0.0288289	-0.416667	0.795833			0.899719	0	0.9			0.16179	0	0.9			3173.88	-0.413793	0.796552
	0.9	1		0.00180443	-0.333333	0.816667			0.00250182	-0.375	0.80625			29739.3	0	0.9			0.0218868	-0.333333	0.816667			0.8615	-0.25	0.8375			0.131984	-0.375	0.80625			26945.2	0	0.9
	0.9	1		0.0110254	0	0.9			0.0035622	-0.428571	0.792857			22544.7	-0.25	0.8375			0.0309828	-0.2	0.85			0.909391	-0.333333	0.816667			0.130608	-0.125	0.86875			4223.08	-0.37931	0.805172
	0.9	1		0.00313952	-0.416667	0.795833			0.00248525	-0.125	0.86875			21844.5	-0.4375	0.790625			0.02472	-0.333333	0.816667			0.881047	-0.4375	0.790625			0.13934	-0.4	0.8			4610.97	-0.344828	0.813793
	0.9	1		0.00817249	0	0.9			0.00347936	-0.285714	0.828571			19363.3	-0.222222	0.844444			0.0303698	0	0.9			0.896656	-0.0833333	0.879167			0.152926	-0.285714	0.828571			4164.72	-0.310345	0.822414
	0.9	1		0.00917025	0	0.9			0.00480482	-0.4	0.8			15758	-0.3125	0.821875			0.0355557	0	0.9			0.913906	0	0.9			0.154931	-0.142857	0.864286			4168.32	-0.275862	0.831034
	0.9	1		0.00214399	-0.2	0.85			0.00465571	-0.333333	0.816667			12264.5	0	0.9			0.0258301	-0.384615	0.803846			0.886984	-0.333333	0.816667			0.165501	-0.25	0.8375			1963.24	-0.25	0.8375
	0.9	1		0.00466304	-0.2	0.85			0.00336338	-0.285714	0.828571			18540.7	-0.285714	0.828571			0.0242229	0	0.9			0.904281	-0.3125	0.821875			0.147094	-0.4	0.8			5549.65	-0.3125	0.821875
	0.9	1		0.0104315	0	0.9			0.00291603	-0.35	0.8125			19392.8	-0.111111	0.872222			0.0332527	0	0.9			0.898266	0.0833333	0.920833			0.137501	-0.2	0.85			6130.07	-0.1875	0.853125
	0.9	1		0.000907033	-0.375	0.80625			0.00280005	0	0.9			9610.95	0	0.9			0.0190205	0	0.9			0.870328	0	0.9			0.140085	0	0.9			4960.31	-0.241379	0.839655
	0.9	1		0.00830896	0.25	0.9625			0.00342965	-0.142857	0.864286			17728.9	-0.142857	0.864286			0.0309663	0.2	0.95			0.906203	-0.1875	0.853125			0.141991	-0.1875	0.853125			5675.59	-0.0625	0.884375
	0.9	1		0.00257749	-0.25	0.8375			0.00291603	-0.25	0.8375			12631.9	-0.333333	0.816667			0.0266916	-0.307692	0.823077			0.879484	-0.3125	0.821875			0.143184	-0.0625	0.884375			3919.51	-0.206897	0.848276
	0.9	1		0.00702971	-0.25	0.8375			0.00304858	-0.15	0.8625			19638.5	0	0.9			0.0291935	-0.2	0.85			0.886969	-0.222222	0.844444			0.145735	-0.2	0.85			3253.11	-0.172414	0.856897
	0.9	1		0.00497343	0	0.9			0.00395984	-0.428571	0.792857			21194.7	-0.3125	0.821875			0.0263106	-0.230769	0.842308			0.881313	-0.1875	0.853125			0.141278	0.0625	0.915625			7914.37	-0.333333	0.816667
	0.9	1		0.00251954	0	0.9			0.00241898	0.125	0.93125			16855.4	-0.285714	0.828571			0.0233117	-0.4	0.8			0.861766	0.25	0.9625			0.135297	0	0.9			2189.22	-0.178571	0.855357
	0.9	1		0.00548303	-0.1875	0.853125			0.00286633	-0.05	0.8875			21678.9	-0.1875	0.853125			0.0264597	-0.153846	0.861538			0.867641	0.25	0.9625			0.132	0.125	0.93125			2249.76	-0.107143	0.873214
	0.9	1		0.00370843	-0.25	0.8375			0.00473855	-0.2	0.85			20425.9	0	0.9			0.0285141	-0.25	0.8375			0.881125	-0.0625	0.884375			0.157366	-0.333333	0.816667			1943.43	-0.0357143	0.891071
	0.9	1		0.00664162	-0.25	0.8375			0.00407582	-0.285714	0.828571			16246.6	-0.142857	0.864286			0.0297733	0	0.9			0.899484	0.25	0.9625			0.15667	-0.222222	0.844444			3212.1	-0.137931	0.865517
	0.9	1		0.00702264	-0.0833333	0.879167			0.00314799	-0.142857	0.864286			17181.3	0	0.9			0.029094	0.2	0.95			0.8895	-0.111111	0.872222			0.138777	0.2	0.95			7403.37	0.0625	0.915625
	0.9	1		0.00707762	0.0833333	0.920833			0.00359533	0	0.9			21170.3	-0.0625	0.884375			0.0268573	-0.375	0.80625			0.882969	-0.4375	0.790625			0.143167	0.1875	0.946875			4302.98	-0.103448	0.874138
	0.9	1		0.00183759	0	0.9			0.00391013	-0.142857	0.864286			16917	0.142857	0.935714			0.0243058	0.333333	0.983333			0.886156	-0.3125	0.821875			0.154864	0	0.9			3452.94	-0.0689655	0.882759
	0.9	1		0.00292247	-0.0833333	0.879167			0.00241898	0.375	0.99375			21283	0.0625	0.915625			0.0180098	0	0.9			0.842219	0	0.9			0.11013	0	0.9			39300	0	0.9
	0.9	1		0.00704303	0.25	0.9625			0.00588177	0	0.9			14663.9	-0.2	0.85			0.0351581	0	0.9			0.904297	-0.0625	0.884375			0.167854	0	0.9			3306.73	-0.0344828	0.891379
	0.9	1		0.00339651	0.25	0.9625			0.00200477	-0.25	0.8375			25165.1	0	0.9			0.0229803	-0.2	0.85			0.880109	0.0625	0.915625			0.142488	0.3125	0.978125			7773.48	0	0.9
	0.9	1		0.00636244	-0.0833333	0.879167			0.00309828	0.05	0.9125			14868.1	0	0.9			0.02641	-0.0769231	0.880769			0.884078	-0.1875	0.853125			0.166446	-0.0833333	0.879167			2120.96	0.0357143	0.908929
	0.9	1		0.000920253	-0.125	0.86875			0.00284976	0.15	0.9375			28357.8	0	0.9			0.0212738	-0.333333	0.816667			0.859812	-0.25	0.8375			0.124064	0	0.9			19789.1	0	0.9
	0.9	1		0.00630315	0	0.9			0.00447346	0	0.9			13651.8	0	0.9			0.0321592	-0.25	0.8375			0.879547	0.1875	0.946875			0.148204	-0.285714	0.828571			2155.14	0.107143	0.926786
	0.9	1		0.00118333	0.125	0.93125			0.00228643	0.25	0.9625			19447.9	0.111111	0.927778			0.0231626	0	0.9			0.851688	0	0.9			0.12138	0	0.9			3658.04	0	0.9
	0.9	1		0.00192856	0.2	0.95			0.00409239	0	0.9			18232.2	0	0.9			0.0263934	0	0.9			0.886828	-0.0625	0.884375			0.15904	-0.111111	0.872222			2737.34	0.178571	0.944643
	0.9	1		0.000530446	-0.333333	0.816667			0.00362847	0.142857	0.935714			15506.8	-0.1875	0.853125			0.0206276	0	0.9			0.888109	0	0.9			0.141991	0.4375	1.00937			3896.87	0.0344828	0.908621
	0.9	1		0.000942505	0.375	0.99375			0.00306515	0.25	0.9625			15872.3	-0.0625	0.884375			0.022301	0	0.9			0.889938	0.111111	0.927778			0.132481	0.375	0.99375			6463.28	0.1875	0.946875
	0.9	1		0.00255738	0.0833333	0.920833			0.00475512	0	0.9			16094.4	0.0625	0.915625			0.0259626	0.0769231	0.919231			0.886687	0.0625	0.915625			0.151866	0.142857	0.935714			4395.58	0.0689655	0.917241
	0.9	1		0.00298934	0.25	0.9625			0.00384386	-0.0625	0.884375			16900.4	0.285714	0.971429			0.0266916	0.153846	0.938462			0.897594	0.416667	1.00417			0.151567	-0.142857	0.864286			4428.93	0.103448	0.925862
	0.9	1		0.00715832	0.416667	1.00417			0.00475512	0.2	0.95			17988.5	0.142857	0.935714			0.0321923	0.25	0.9625			0.912797	0	0.9			0.163729	0.0833333	0.920833			4717.18	0.137931	0.934483
	0.9	1		0.00401358	-0.375	0.80625			0.00447346	0.333333	0.983333			19069.3	0.222222	0.955556			0.027139	-0.125	0.86875			0.905	0.0625	0.915625			0.154997	0.285714	0.971429			5020.11	0.172414	0.943103
	0.9	1		0.00562661	-0.0625	0.884375			0.00394327	0.142857	0.935714			13998.2	0.2	0.95			0.0274372	0.125	0.93125			0.894375	-0.25	0.8375			0.15682	0	0.9			3303.3	0.206897	0.951724
	0.9	1		0.000331367	0	0.9			0.00352906	0.285714	0.971429			17939.8	0.285714	0.971429			0.0219862	0.333333	0.983333			0.883078	0.1875	0.946875			0.144774	0	0.9			3596.76	0.241379	0.960345
	0.9	1		0.00690932	0.0833333	0.920833			0.00288289	0.35	0.9875			23300.3	0.25	0.9625			0.0269733	0.375	0.99375			0.880469	0.3125	0.978125			0.140268	0.4	1			3441.32	0.275862	0.968966
	0.9	1		0.00412582	-0.125	0.86875			0.00414209	0.285714	0.971429			23765.6	0	0.9			0.0256147	0.25	0.9625			0.90725	0.1875	0.946875			0.150507	0	0.9			4967.53	0.310345	0.977586
	0.9	1		0.00395123	0.125	0.93125			0.00294917	0.45	1.0125			21744.9	0.1875	0.946875			0.0261283	0.230769	0.957692			0.879891	0.4375	1.00937			0.147989	0.142857	0.935714			3551.71	0.344828	0.986207
	0.9	1		0.00457758	0.2	0.95			0.00366161	0.0625	0.915625			15062	0.1875	0.946875			0.0263106	0.307692	0.976923			0.90475	0.3125	0.978125			0.149115	0.285714	0.971429			6453.23	0.3125	0.978125
	0.9	1		0.0044644	0.4	1			0.00318113	0	0.9			18670.7	0.333333	0.983333			0.0230135	0.2	0.95			0.882844	0.3125	0.978125			0.156654	0.111111	0.927778			2748.22	0.25	0.9625
	0.9	1		0.00559083	0.0625	0.915625			0.00333024	0.142857	0.935714			21268.2	0.3125	0.978125			0.0287958	-0.0833333	0.879167			0.911703	0	0.9			0.125969	0	0.9			7767.57	0.333333	0.983333
	0.9	1		0.000579893	0.333333	0.983333			0.00192193	0.25	0.9625			28047.7	0	0.9			0.0214395	0.333333	0.983333			0.859156	0.25	0.9625			0.10511	0	0.9			11596.2	0	0.9
	0.9	1		0.00416819	0.375	0.99375			0.00316456	0.285714	0.971429			12688.4	0.333333	0.983333			0.0267745	0.384615	0.996154			0.878281	0	0.9			0.152628	0.428571	1.00714			3031.44	0.321429	0.980357
	0.9	1		0.00569614	0.1875	0.946875			0.00480482	0.4	1			16989.8	0.428571	1.00714			0.0298065	0.4	1			0.904	0.4375	1.00937			0.163894	0.25	0.9625			3003.02	0.392857	0.998214
	0.9	1		0.00137477	0.333333	0.983333			0.00367818	0.1875	0.946875			17426.7	0.428571	1.00714			0.0204785	0.25	0.9625			0.886859	0.4375	1.00937			0.149397	0.428571	1.00714			4672.45	0.37931	0.994828
	0.9	1		0.00308229	0.416667	1.00417			0.00366161	0.3125	0.978125			16125.7	0.3125	0.978125			0.026062	0.461538	1.01538			0.901328	0.333333	0.983333			0.145106	0.2	0.95			5628.43	0.4375	1.00937
	0.9	1		0.00567113	0.3125	0.978125			0.00379415	0.4375	1.00937			14433.2	0.4	1			0.028481	0.0833333	0.920833			0.887422	0.222222	0.955556			0.159056	0.222222	0.955556			3335.72	0.413793	1.00345
	0.9	1		0.00208241	0.4	1			0.00349592	0.428571	1.00714			19705.3	0.444444	1.01111			0.0236099	0.4	1			0.888062	0.333333	0.983333			0.15667	0.333333	0.983333			3641.69	0.448276	1.01207
	0.9	1		0.00658673	0.25	0.9625			0.00430777	0	0.9			20734.9	0.333333	0.983333			0.028365	0.25	0.9625			0.890188	0.444444	1.01111			0.163662	0.416667	1.00417			2491	0.464286	1.01607
	0.9	1		0.00644971	0.416667	1.00417			0.00321426	0.428571	1.00714			15206.5	0.4375	1.00937			0.0289284	0.416667	1.00417			0.894437	0.25	0.9625			0.156124	0.444444	1.01111			3379.76	0.482759	1.02069
	0.9	1		0.00563305	0.4375	1.00937			0.00409239	0.428571	1.00714			20975.9	0.4375	1.00937			0.030171	0.4	1			0.908703	0.333333	0.983333			0.147276	0.4	1			14106.2	0	0.9
	1.65	1		0.00630264	-0.4375	1.54062			0.00666048	-0.375	1.55625			23606.7	-0.416667	1.54583			0.0353237	-0.333333	1.56667			0.908828	-0.416667	1.54583			0.168384	-0.444444	1.53889			3262.22	-0.48	1.53
	1.65	1		0.0039571	-0.416667	1.54583			0.00889721	-0.25	1.5875			24879.5	-0.444444	1.53889			0.0368977	-0.375	1.55625			0.905406	-0.444444	1.53889			0.174349	-0.375	1.55625			3127.07	-0.44	1.54
	1.65	1		0.00658834	-0.25	1.5875			0.00690901	-0.375	1.55625			24300.4	-0.333333	1.56667			0.0364835	-0.125	1.61875			0.911281	-0.458333	1.53542			0.159172	-0.458333	1.53542			5888.71	-0.4375	1.54062
	1.65	1		0.00258009	-0.461538	1.53462			0.00556697	-0.472222	1.53194			26499.3	-0.4375	1.54062			0.0325568	-0.45	1.5375			0.895516	-0.428571	1.54286			0.144625	-0.333333	1.56667			3253.12	-0.4	1.55
	1.65	1		0.00264773	-0.384615	1.55385			0.0055007	-0.416667	1.54583			21974.2	-0.444444	1.53889			0.0308006	-0.375	1.55625			0.910469	-0.375	1.55625			0.169064	-0.333333	1.56667			5124.76	-0.416667	1.54583
	1.65	1		0.00167472	-0.464286	1.53393			0.00503678	-0.4375	1.54062			17644.8	-0.428571	1.54286			0.0309166	-0.45	1.5375			0.881969	-0.25	1.5875			0.168716	-0.222222	1.59444			2011.52	-0.375	1.55625
	1.65	1		0.00258875	-0.307692	1.57308			0.00902976	0.25	1.7125			26222.2	-0.3125	1.57187			0.0401948	-0.25	1.5875			0.918453	-0.333333	1.56667			0.178474	-0.25	1.5875			3561.1	-0.36	1.56
	1.65	1		0.00254123	-0.230769	1.59231			0.00631255	-0.416667	1.54583			38706	0	1.65			0.0344291	-0.428571	1.54286			0.935625	0	1.65			0.149645	-0.444444	1.53889			20025.9	0	1.65
	1.65	1		0.00765983	0	1.65			0.0062297	-0.25	1.5875			24293	-0.222222	1.59444			0.0338823	-0.333333	1.56667			0.914094	-0.375	1.55625			0.145387	0	1.65			5722.99	-0.3125	1.57187
	1.65	1		0.00352443	-0.45	1.5375			0.00538472	-0.361111	1.55972			18457.2	-0.444444	1.53889			0.0324574	-0.35	1.5625			0.901937	-0.4	1.55			0.165866	-0.458333	1.53542			4322.6	-0.466667	1.53333
	1.65	1		0.00429351	-0.25	1.5875			0.00825104	-0.333333	1.56667			21443.7	-0.333333	1.56667			0.0368977	0.125	1.68125			0.90975	-0.291667	1.57708			0.173736	-0.125	1.61875			2873.02	-0.444444	1.53889
	1.65	1		0.000511477	-0.375	1.55625			0.00735635	-0.333333	1.56667			17332.4	-0.285714	1.57857			0.0348598	-0.285714	1.57857			0.906281	-0.25	1.5875			0.181705	0	1.65			2936.03	-0.333333	1.56667
	1.65	1		0.00267367	-0.153846	1.61154			0.00641196	-0.0833333	1.62917			26586.9	-0.1875	1.60312			0.0289118	-0.45	1.5375			0.894141	-0.428571	1.54286			0.158394	-0.375	1.55625			4287.45	-0.4	1.55
	1.65	1		0.000868062	-0.45	1.5375			0.0058652	-0.416667	1.54583			20430.6	-0.4	1.55			0.0275698	-0.333333	1.56667			0.89875	-0.416667	1.54583			0.156124	-0.428571	1.54286			5567.16	-0.1875	1.60312
	1.65	1		0.00222201	-0.392857	1.55179			0.0049208	-0.454545	1.53636			22618.7	-0.25	1.5875			0.0291603	-0.35	1.5625			0.888625	-0.416667	1.54583			0.145255	0.333333	1.73333			4006.7	-0.333333	1.56667
	1.65	1		0.00910936	-0.25	1.5875			0.00806879	0	1.65			27211.3	-0.0625	1.63437			0.0409404	0.25	1.7125			0.909969	-0.208333	1.59792			0.151683	-0.416667	1.54583			2834.87	-0.222222	1.59444
	1.65	1		0.00509837	-0.428571	1.54286			0.0062297	0.0833333	1.67083			33636.2	0	1.65			0.0347439	-0.142857	1.61429			0.911344	-0.125	1.61875			0.166131	-0.375	1.55625			3527.01	-0.32	1.57
	1.65	1		0.00221645	-0.321429	1.56964			0.00564981	-0.305556	1.57361			24261.3	-0.111111	1.62222			0.0312314	-0.35	1.5625			0.891359	-0.416667	1.54583			0.164259	-0.291667	1.57708			7115.26	-0.25	1.5875
	1.65	1		0.00273117	-0.0769231	1.63077			0.00564981	-0.25	1.5875			25284.2	-0.375	1.55625			0.0296905	-0.25	1.5875			0.888391	-0.25	1.5875			0.159239	-0.291667	1.57708			3273.76	-0.28	1.58
	1.65	1		0.00367074	-0.35	1.5625			0.00556697	-0.194444	1.60139			27090.8	0.0625	1.66562			0.0317284	-0.25	1.5875			0.919	0	1.65			0.157383	-0.208333	1.59792			8257.94	-0.25	1.5875
	1.65	1		0.00616701	-0.3125	1.57187			0.00563324	-0.138889	1.61528			23549.6	-0.0833333	1.62917			0.0325568	-0.25	1.5875			0.9155	0	1.65			0.163116	-0.333333	1.56667			5426.43	-0.0625	1.63437
	1.65	1		0.00535965	-0.285714	1.57857			0.00536815	-0.0833333	1.62917			21955.8	-0.222222	1.59444			0.031132	-0.15	1.6125			0.905219	-0.333333	1.56667			0.165037	-0.208333	1.59792			3879.2	-0.266667	1.58333
	1.65	1		0.00406695	-0.0833333	1.62917			0.00506992	-0.3125	1.57187			26002.8	-0.125	1.61875			0.031629	-0.05	1.6375			0.887609	-0.0833333	1.62917			0.149745	-0.333333	1.56667			3692.95	-0.24	1.59
	1.65	1		0.00295726	0	1.65			0.00629598	0.25	1.7125			24447.7	0	1.65			0.0341143	0	1.65			0.870156	0	1.65			0.149364	-0.222222	1.59444			1969.62	-0.125	1.61875
	1.65	1		0.00540466	-0.142857	1.61429			0.00536815	-0.0277778	1.64306			16915.1	-0.142857	1.61429			0.0316124	0.05	1.6625			0.897359	-0.285714	1.57857			0.158079	-0.125	1.61875			3736.9	-0.2	1.6
	1.65	1		0.00204161	-0.25	1.5875			0.00772086	-0.25	1.5875			24525.2	0.111111	1.67778			0.0346776	0.142857	1.68571			0.904641	-0.222222	1.59444			0.169047	-0.111111	1.62222			2723.71	-0.111111	1.62222
	1.65	1		0.00223089	-0.178571	1.60536			0.00682616	-0.125	1.61875			15113.7	0	1.65			0.0332196	0	1.65			0.893984	-0.285714	1.57857			0.170571	-0.4	1.55			3248.22	-0.16	1.61
	1.65	1		0.00421179	0.0833333	1.67083			0.00372788	-0.25	1.5875			18212.8	-0.333333	1.56667			0.0292597	-0.15	1.6125			0.889391	-0.25	1.5875			0.15561	-0.285714	1.57857			3823.52	-0.2	1.6
	1.65	1		0.00627469	-0.1875	1.60312			0.00477169	-0.363636	1.55909			19502.2	-0.25	1.5875			0.0312645	0.15	1.6875			0.901828	-0.2	1.6			0.15392	-0.142857	1.61429			3744.47	-0.12	1.62
	1.65	1		0.00582691	-0.0625	1.63437			0.00768772	0.25	1.7125			20468.7	-0.2	1.6			0.0382232	-0.25	1.5875			0.903375	-0.111111	1.62222			0.174084	0.125	1.68125			2856.12	0	1.65
	1.65	1		0.00179436	-0.107143	1.62321			0.00609716	-0.25	1.5875			11941.6	-0.25	1.5875			0.0321261	-0.15	1.6125			0.893984	-0.142857	1.61429			0.167771	0	1.65			1816.82	0.125	1.68125
	1.65	1		0.00162986	-0.0357143	1.64107			0.00342965	-0.25	1.5875			25256	0.125	1.68125			0.0242064	-0.25	1.5875			0.881484	0.25	1.7125			0.143134	-0.375	1.55625			4648.94	-0.25	1.5875
	1.65	1		0.000904456	-0.35	1.5625			0.00508649	-0.1875	1.60312			24411.1	0.222222	1.70556			0.0310491	0.25	1.7125			0.909375	-0.0416667	1.63958			0.148684	-0.111111	1.62222			4094.26	-0.133333	1.61667
	1.65	1		0.00141831	0.0357143	1.65893			0.00568295	0.0277778	1.65694			17658.4	0	1.65			0.0289946	-0.05	1.6375			0.896312	-0.142857	1.61429			0.159404	-0.0416667	1.63958			3358.54	-0.08	1.63
	1.65	1		0.00272387	0.0769231	1.66923			0.0065445	0.125	1.68125			17507.5	0.142857	1.68571			0.0311154	0.35	1.7375			0.897328	0	1.65			0.172062	-0.2	1.6			3338.05	-0.04	1.64
	1.65	1		0.00161046	0.107143	1.67679			0.00505335	-0.0625	1.63437			23808.6	0.333333	1.73333			0.0251673	-0.333333	1.56667			0.890203	-0.0833333	1.62917			0.153257	-0.25	1.5875			4456.05	-0.0666667	1.63333
	1.65	1		0.00283527	0.153846	1.68846			0.00468885	-0.272727	1.58182			20186.2	0	1.65			0.0266088	-0.4	1.55			0.888391	0.0833333	1.67083			0.167622	0.111111	1.67778			2771.21	0.111111	1.67778
	1.65	1		0.00104433	-0.25	1.5875			0.00480482	-0.181818	1.60455			21004.4	0.2	1.7			0.0260123	-0.2	1.6			0.903969	0	1.65			0.129614	0	1.65			8340.77	0.25	1.7125
	1.65	1		0.00220415	0.178571	1.69464			0.00468885	-0.0909091	1.62727			28649	0	1.65			0.0302538	-0.125	1.61875			0.892687	0	1.65			0.147525	0	1.65			3402.6	0	1.65
	1.65	1		0.00386938	-0.25	1.5875			0.00470541	0	1.65			26313.1	0.1875	1.69687			0.0227318	-0.25	1.5875			0.878766	0	1.65			0.141196	-0.125	1.61875			3401.12	0.04	1.66
	1.65	1		0.00169354	0.25	1.7125			0.00599775	-0.0833333	1.62917			26339.4	0.3125	1.72812			0.0324574	-0.05	1.6375			0.917781	0.333333	1.73333			0.170406	0	1.65			3947.02	0	1.65
	1.65	1		0.00132733	-0.15	1.6125			0.00543442	0.0833333	1.67083			18240.5	-0.222222	1.59444			0.0294751	0.05	1.6625			0.893609	0.142857	1.68571			0.147823	0.111111	1.67778			3436.96	0.08	1.67
	1.65	1		0.00972271	0	1.65			0.00740606	0	1.65			27686.9	-0.333333	1.56667			0.0374611	0	1.65			0.900078	-0.25	1.5875			0.152015	-0.0833333	1.62917			5114.02	-0.0833333	1.62917
	1.65	1		0.00423791	0.25	1.7125			0.00412552	0	1.65			17942.1	-0.111111	1.62222			0.030668	0.125	1.68125			0.890656	0.0833333	1.67083			0.14716	0.222222	1.70556			3542.88	0.12	1.68
	1.65	1		0.00650867	0.0625	1.66562			0.0071741	-0.125	1.61875			30270.7	0	1.65			0.0328551	0.05	1.6625			0.888703	0.25	1.7125			0.167208	0.222222	1.70556			4201.83	0.0666667	1.66667
	1.65	1		0.00033793	-0.125	1.61875			0.00449003	-0.375	1.55625			16175.1	-0.416667	1.54583			0.0223673	-0.25	1.5875			0.899422	-0.0833333	1.62917			0.14996	0.333333	1.73333			3955.96	0.133333	1.68333
	1.65	1		0.00307409	0.230769	1.70769			0.00546756	0.138889	1.68472			11044.7	0	1.65			0.0323083	0.15	1.6875			0.906953	-0.0833333	1.62917			0.164574	-0.125	1.61875			4814.15	0.0833333	1.67083
	1.65	1		0.00197003	0.321429	1.73036			0.0071741	0.125	1.68125			17134.2	0.285714	1.72143			0.0355226	0	1.65			0.923141	0	1.65			0.171847	0.2	1.7			9080.76	-0.25	1.5875
	1.65	1		0.00370928	-0.15	1.6125			0.00472198	0.0909091	1.67273			17917.9	0	1.65			0.0289781	0.15	1.6875			0.905797	0.111111	1.67778			0.161044	0	1.65			3302.27	0.16	1.69
	1.65	1		0.00172032	0.392857	1.74821			0.00545099	0.194444	1.69861			18882.4	0.111111	1.67778			0.0296574	0.25	1.7125			0.905234	0.222222	1.70556			0.157051	0.0416667	1.66042			4404.11	0.2	1.7
	1.65	1		0.00085162	-0.05	1.6375			0.00533501	0.0625	1.66562			16346.8	-0.25	1.5875			0.0281331	-0.375	1.55625			0.886109	0.416667	1.75417			0.166495	-0.0416667	1.63958			2691.2	0.222222	1.70556
	1.65	1		0.00600234	0.1875	1.69687			0.0036119	0.25	1.7125			32131.5	0	1.65			0.0241401	0.25	1.7125			0.904578	0.333333	1.73333			0.125373	0	1.65			5701.21	0.0625	1.66562
	1.65	1		0.00366082	-0.05	1.6375			0.00576579	0.0833333	1.67083			15994.8	-0.0833333	1.62917			0.0269236	0	1.65			0.896906	0.142857	1.68571			0.158957	0.125	1.68125			3482.59	0.2	1.7
	1.65	1		0.00569424	0.3125	1.72812			0.00248525	0	1.65			18758.9	0.222222	1.70556			0.0220691	0.25	1.7125			0.897875	0.0833333	1.67083			0.104281	0	1.65			9876.14	0	1.65
	1.65	1		0.00652592	0.4375	1.75937			0.00608059	0.25	1.7125			13536.2	0	1.65			0.0342468	0.285714	1.72143			0.910297	0.0416667	1.66042			0.15904	0.208333	1.70208			4648	0.25	1.7125
	1.65	1		0.00499134	0	1.65			0.00583206	0.416667	1.75417			18961.4	0.25	1.7125			0.0322917	0.25	1.7125			0.910969	0.125	1.68125			0.166346	0.0416667	1.66042			6686.8	-0.333333	1.56667
	1.65	1		0.00118785	0.05	1.6625			0.00473855	0.181818	1.69545			12544.3	0.25	1.7125			0.0254324	0	1.65			0.900734	0	1.65			0.155759	0	1.65			2862.89	0.333333	1.73333
	1.65	1		0.00313401	0.05	1.6625			0.00482139	0.272727	1.71818			18450.4	0.333333	1.73333			0.027984	-0.125	1.61875			0.905422	0.444444	1.76111			0.166264	0.125	1.68125			3784.06	0.24	1.71
	1.65	1		0.000961822	0.15	1.6875			0.00551726	0.25	1.7125			15979.6	0.0833333	1.67083			0.0264431	0	1.65			0.901234	0.2	1.7			0.166694	0.208333	1.70208			3605.36	0.28	1.72
	1.65	1		0.00428275	0.416667	1.75417			0.00495394	0.363636	1.74091			38536.5	0	1.65			0.0365829	0.375	1.74375			0.924906	0	1.65			0.141063	0.125	1.68125			11657.7	0	1.65
	1.65	1		0.00255174	0.307692	1.72692			0.00558354	0.305556	1.72639			21865.5	-0.111111	1.62222			0.0280337	0.125	1.68125			0.901469	0.4	1.75			0.16005	0.291667	1.72292			6112.69	0.1875	1.69687
	1.65	1		0.00350592	0.15	1.6875			0.00319769	0.25	1.7125			15608.4	0.25	1.7125			0.0235933	0.25	1.7125			0.906344	0.0833333	1.67083			0.150971	0.0833333	1.67083			6363.06	0	1.65
	1.65	1		0.00501318	0.142857	1.68571			0.00531844	0.1875	1.69687			34975.7	0	1.65			0.0335344	0.333333	1.73333			0.898641	0.25	1.7125			0.151716	0.25	1.7125			3278.39	0.32	1.73
	1.65	1		0.000321699	0.125	1.68125			0.00573265	0.361111	1.74028			18445.1	0.444444	1.76111			0.0290775	0.35	1.7375			0.897	0.285714	1.72143			0.163712	0.291667	1.72292			3430.91	0.36	1.74
	1.65	1		0.00296356	0.384615	1.74615			0.00735635	0.333333	1.73333			21927.7	0	1.65			0.0342799	0.428571	1.75714			0.909375	0.208333	1.70208			0.1741	0.375	1.74375			4171.36	0.266667	1.71667
	1.65	1		0.00226205	0.461538	1.76538			0.00697528	0.375	1.74375			21753.8	0.111111	1.67778			0.0359533	0.333333	1.73333			0.909219	0.291667	1.72292			0.166926	0.375	1.74375			4833.25	0.416667	1.75417
	1.65	1		0.0197433	0	1.65			0.00994102	0	1.65			28084.3	0	1.65			0.0456293	0	1.65			0.907188	0.25	1.7125			0.142919	0.375	1.74375			4194.43	0.333333	1.73333
	1.65	1		0.00393787	0.25	1.7125			0.00444032	-0.125	1.61875			22540.7	0.222222	1.70556			0.0289284	0.45	1.7625			0.896531	0.428571	1.75714			0.155411	0.142857	1.68571			5645.7	0.3125	1.72812
	1.65	1		0.00111452	0.25	1.7125			0.0045563	0.125	1.68125			21078.5	0.4	1.75			0.0248857	0.333333	1.73333			0.891891	0.285714	1.72143			0.153738	0.285714	1.72143			6196.75	0.4375	1.75937
	1.65	1		0.00381324	0.35	1.7375			0.00465571	0.454545	1.76364			22433.4	0.333333	1.73333			0.0270561	0.333333	1.73333			0.898453	0.416667	1.75417			0.164772	0.458333	1.76458			4109.76	0.4	1.75
	1.65	1		0.00852567	0.25	1.7125			0.00651137	0.416667	1.75417			22757	0.0833333	1.67083			0.0309	0.45	1.7625			0.893906	0.428571	1.75714			0.14779	0.444444	1.76111			3169.26	0.4	1.75
	1.65	1		0.00366502	0.45	1.7625			0.00543442	0.416667	1.75417			22214.5	0.444444	1.76111			0.0265922	0.2	1.7			0.913953	-0.125	1.61875			0.150225	0.416667	1.75417			7250.2	0.25	1.7125
	1.65	1		0.0048649	0.285714	1.72143			0.0055504	0.472222	1.76806			16844.5	0.428571	1.75714			0.0321095	0.35	1.7375			0.911891	0.125	1.68125			0.160382	0.333333	1.73333			8703.38	0.25	1.7125
	1.65	1		0.00516683	0.428571	1.75714			0.0052356	0.3125	1.72812			27692.9	0.333333	1.73333			0.0265259	0.4	1.75			0.891016	0.25	1.7125			0.153937	0.428571	1.75714			3667.02	0.44	1.76
	1.65	1		0.00192114	0.464286	1.76607			0.0068593	0.375	1.74375			24458.7	0.444444	1.76111			0.0321923	0.45	1.7625			0.906344	0.416667	1.75417			0.172526	0.4	1.75			4440.84	0.466667	1.76667
	1.65	1		0.00136224	0.35	1.7375			0.00434091	0.375	1.74375			15581.8	0.416667	1.75417			0.0283153	0.375	1.74375			0.912531	0.375	1.74375			0.157731	0.375	1.74375			6956.45	0.333333	1.73333
	1.65	1		0.000570587	0.45	1.7625			0.00516933	0.4375	1.75937			27071.2	0.4375	1.75937			0.029939	0.375	1.74375			0.890484	0.416667	1.75417			0.158046	0.458333	1.76458			2542.34	0.444444	1.76111
	1.65	1		0.00712488	0.25	1.7125			0.0112665	0	1.65			22557.7	0.25	1.7125			0.0451156	-0.25	1.5875			0.935891	0	1.65			0.167075	0.333333	1.73333			11802.5	0	1.65
	1.65	1		8.28418e-05	0.375	1.74375			0.00823448	0.333333	1.73333			25835.5	0.375	1.74375			0.0388859	0.25	1.7125			0.910734	0.375	1.74375			0.177281	0.25	1.7125			3268.4	0.48	1.77
	1.65	1		0.0127311	0	1.65			0.0100736	0	1.65			23118	0.416667	1.75417			0.0448671	0.25	1.7125			0.91	0.458333	1.76458			0.167722	0.444444	1.76111			2194.9	0.375	1.74375
	2.4	1		0.00801595	-0.4	2.3			0.00391013	-0.4375	2.29062			14526.8	-0.25	2.3375			0.0306018	-0.458333	2.28542			0.907781	-0.454545	2.28636			0.143764	-0.416667	2.29583			5126.85	-0.466667	2.28333
	2.4	1		0.0145065	-0.25	2.3375			0.0048711	-0.416667	2.29583			25802.6	-0.45	2.2875			0.0411392	-0.333333	2.31667			0.907953	-0.363636	2.30909			0.15962	-0.461538	2.28462			3916.06	-0.470588	2.28235
	2.4	1		0.00384	-0.333333	2.31667			0.00205448	0	2.4			20701.3	-0.45	2.2875			0.0225661	-0.25	2.3375			0.871891	0	2.4			0.145305	-0.25	2.3375			5329.56	-0.4	2.3
	2.4	1		0.00939638	-0.4	2.3			0.00389356	-0.3125	2.32187			21438.3	-0.35	2.3125			0.032358	-0.428571	2.29286			0.895281	-0.4	2.3			0.153108	-0.4	2.3			3864.96	-0.411765	2.29706
	2.4	2		0.00451639	-0.4	2.3			0.00309828	-0.4	2.3			25131.3	-0.4375	2.29062			0.0295414	-0.416667	2.29583			0.858703	0	2.4			0.149364	-0.428571	2.29286			1696.36	0	2.4
	2.4	2		0.00893048	-0.416667	2.29583			0.00558354	-0.333333	2.31667			26075.3	-0.35	2.3125			0.0352078	-0.4375	2.29062			0.898531	-0.375	2.30625			0.174034	-0.375	2.30625			3058.58	-0.461538	2.28462
	2.4	2		0.010402	-0.4375	2.29062			0.00608059	-0.333333	2.31667			25962.4	-0.25	2.3375			0.0381072	-0.4	2.3			0.905141	-0.444444	2.28889			0.171764	-0.125	2.36875			4200.73	-0.352941	2.31176
	2.4	2		0.0083785	-0.4	2.3			0.0029326	-0.416667	2.29583			19366.4	-0.25	2.3375			0.0307674	-0.375	2.30625			0.900297	-0.375	2.30625			0.141278	-0.375	2.30625			5313	-0.333333	2.31667
	2.4	2		0.00592925	-0.4	2.3			0.00278348	-0.25	2.3375			37837	-0.25	2.3375			0.0310491	-0.4	2.3			0.899969	-0.125	2.36875			0.129349	-0.375	2.30625			7245.62	-0.45	2.2875
	2.4	2		0.0116975	-0.45	2.2875			0.00546756	-0.428571	2.29286			28343.2	-0.444444	2.28889			0.0380907	-0.2	2.35			0.912047	-0.461538	2.28462			0.147492	-0.428571	2.29286			6602.57	-0.46875	2.28281
	2.4	2		0.00122483	0	2.4			0.00334681	-0.444444	2.28889			21850.4	-0.428571	2.29286			0.0254987	-0.25	2.3375			0.895297	-0.2	2.35			0.129034	-0.125	2.36875			5631.22	-0.444444	2.28889
	2.4	2		0.0162033	-0.375	2.30625			0.004606	-0.4375	2.29062			28874	-0.333333	2.31667			0.0402445	-0.375	2.30625			0.913578	-0.384615	2.30385			0.127991	-0.333333	2.31667			6646.77	-0.40625	2.29844
	2.4	2		0.0107707	-0.333333	2.31667			0.00331367	-0.333333	2.31667			18541.5	0	2.4			0.0327225	-0.285714	2.32857			0.896531	-0.125	2.36875			0.137352	-0.333333	2.31667			3303.29	-0.384615	2.30385
	2.4	2		0.00342388	-0.25	2.3375			0.0026178	0	2.4			33787.7	-0.25	2.3375			0.0252005	0.25	2.4625			0.913125	-0.307692	2.32308			0.128686	0.125	2.43125			14575.3	-0.333333	2.31667
	2.4	2		0.00673876	-0.375	2.30625			0.0029326	-0.0833333	2.37917			14707.3	0.25	2.4625			0.0312314	-0.2	2.35			0.894797	0	2.4			0.156057	-0.444444	2.28889			3571.62	-0.307692	2.32308
	2.4	2		0.011787	-0.35	2.3125			0.00493737	-0.25	2.3375			25723.4	-0.15	2.3625			0.0357711	-0.444444	2.28889			0.912469	-0.230769	2.34231			0.153274	-0.2	2.35			4115.04	-0.294118	2.32647
	2.4	2		0.014015	-0.375	2.30625			0.00729008	-0.333333	2.31667			20245.2	-0.416667	2.29583			0.0457452	-0.25	2.3375			0.903094	-0.416667	2.29583			0.155146	-0.333333	2.31667			3102.5	-0.230769	2.34231
	2.4	2		0.008093	-0.2	2.35			0.00430777	-0.416667	2.29583			23111.2	-0.333333	2.31667			0.0331202	-0.375	2.30625			0.898891	0.125	2.43125			0.150441	-0.285714	2.32857			3832.53	-0.235294	2.34118
	2.4	2		0.00607987	-0.25	2.3375			0.00763801	-0.25	2.3375			23265.3	0	2.4			0.0399629	-0.125	2.36875			0.915797	-0.444444	2.28889			0.177016	-0.25	2.3375			3713.46	-0.153846	2.36154
	2.4	2		0.0180314	0	2.4			0.00644509	-0.333333	2.31667			26090.7	-0.05	2.3875			0.0483299	0	2.4			0.933109	0	2.4			0.135711	-0.416667	2.29583			7315.82	-0.35	2.3125
	2.4	2		0.00958237	-0.2	2.35			0.00543442	-0.285714	2.32857			23841.8	-0.333333	2.31667			0.0361356	-0.333333	2.31667			0.924828	-0.25	2.3375			0.141129	-0.25	2.3375			14686.2	0	2.4
	2.4	2		0.00707871	-0.125	2.36875			0.00341308	-0.222222	2.34444			28220.4	-0.222222	2.34444			0.0312314	0	2.4			0.911609	-0.4375	2.29062			0.130211	0.375	2.49375			7591.8	-0.25	2.3375
	2.4	2		0.0139785	-0.125	2.36875			0.00472198	-0.3125	2.32187			32188.9	-0.333333	2.31667			0.0415037	-0.375	2.30625			0.894297	0.2	2.45			0.148999	-0.142857	2.36429			3513.74	-0.0769231	2.38077
	2.4	2		0.0101654	-0.3125	2.32187			0.00732322	0	2.4			25375.9	0.05	2.4125			0.0416197	-0.125	2.36875			0.921828	-0.416667	2.29583			0.165286	-0.333333	2.31667			5967.02	-0.333333	2.31667
	2.4	2		0.00833127	-0.2	2.35			0.00386043	-0.1875	2.35312			27035.9	-0.375	2.30625			0.0309663	0.2	2.45			0.889297	-0.333333	2.31667			0.17014	-0.4	2.3			3825.63	-0.176471	2.35588
	2.4	2		0.00554092	-0.2	2.35			0.00583206	-0.416667	2.29583			33605.1	0.25	2.4625			0.0346444	-0.416667	2.29583			0.912594	-0.153846	2.36154			0.162734	-0.45	2.2875			3571.87	0	2.4
	2.4	2		0.0133364	-0.375	2.30625			0.0055007	0	2.4			40954.1	0	2.4			0.0381238	0	2.4			0.924687	0.25	2.4625			0.111041	0	2.4			6682.84	-0.34375	2.31406
	2.4	2		0.0073637	-0.4	2.3			0.00598118	-0.25	2.3375			25151.4	-0.3125	2.32187			0.0335012	-0.125	2.36875			0.908109	-0.272727	2.33182			0.169213	-0.2	2.35			2804.72	0	2.4
	2.4	2		0.0175756	-0.333333	2.31667			0.0058652	-0.0833333	2.37917			27340.2	-0.428571	2.29286			0.042531	-0.25	2.3375			0.909297	-0.181818	2.35455			0.173388	0.125	2.43125			6408.14	-0.28125	2.32969
	2.4	2		0.00934498	-0.25	2.3375			0.00331367	-0.111111	2.37222			28223.4	-0.111111	2.37222			0.0363013	-0.222222	2.34444			0.909922	-0.3125	2.32187			0.134535	-0.25	2.3375			7916.93	-0.4	2.3
	2.4	2		0.0133181	-0.125	2.36875			0.00374445	-0.0625	2.38437			36615.4	-0.375	2.30625			0.0349261	-0.3125	2.32187			0.902781	-0.25	2.3375			0.101879	0	2.4			13060.1	-0.25	2.3375
	2.4	2		0.0104103	-0.1875	2.35312			0.00369474	-0.4375	2.29062			25434	0.15	2.4375			0.0326894	-0.142857	2.36429			0.91375	-0.0769231	2.38077			0.135115	-0.0833333	2.37917			6467.87	-0.21875	2.34531
	2.4	2		0.0164487	-0.125	2.36875			0.00647823	0	2.4			29683.1	-0.333333	2.31667			0.040841	0	2.4			0.914578	-0.333333	2.31667			0.136606	0	2.4			4517.63	-0.117647	2.37059
	2.4	2		0.0048337	-0.2	2.35			0.00458944	-0.1875	2.35312			22368	-0.285714	2.32857			0.0303201	-0.291667	2.32708			0.893563	0	2.4			0.143548	-0.125	2.36875			3783.64	-0.0588235	2.38529
	2.4	2		0.00487369	-0.25	2.3375			0.00275035	0.0833333	2.42083			37324.7	-0.333333	2.31667			0.0244715	-0.25	2.3375			0.877734	0	2.4			0.127013	0	2.4			3595.38	0.0769231	2.41923
	2.4	2		0.0121379	-0.25	2.3375			0.00316456	-0.2	2.35			38041.1	0.25	2.4625			0.0310822	0.4	2.5			0.929312	-0.333333	2.31667			0.114189	0	2.4			6404.35	-0.15625	2.36094
	2.4	2		0.0127378	0	2.4			0.00362847	-0.3125	2.32187			20936.5	-0.25	2.3375			0.0361853	-0.111111	2.37222			0.920734	-0.25	2.3375			0.132845	-0.25	2.3375			5648.85	-0.222222	2.34444
	2.4	2		0.0091293	-0.0833333	2.37917			0.00478826	-0.0833333	2.37917			22772.5	0.333333	2.48333			0.0371794	-0.444444	2.28889			0.912391	0	2.4			0.14658	-0.285714	2.32857			4241.45	0	2.4
	2.4	2		0.0133686	0.125	2.43125			0.00465571	-0.0625	2.38437			20194.5	-0.25	2.3375			0.0374114	-0.333333	2.31667			0.904844	-0.333333	2.31667			0.147525	-0.142857	2.36429			5201.66	-0.266667	2.33333
	2.4	2		0.00962342	0	2.4			0.00333024	0	2.4			20058.1	-0.0833333	2.37917			0.0343628	-0.25	2.3375			0.889734	0	2.4			0.140566	0.25	2.4625			2999.25	0.153846	2.43846
	2.4	2		0.00316889	-0.25	2.3375			0.00970906	0	2.4			19863.3	0.0833333	2.42083			0.0428789	0.25	2.4625			0.91825	-0.444444	2.28889			0.178027	0.25	2.4625			26332	0	2.4
	2.4	2		0.00953883	0.2	2.45			0.00468885	0.0625	2.41562			15470.6	0	2.4			0.0346279	-0.0833333	2.37917			0.913531	0.0769231	2.41923			0.156207	-0.222222	2.34444			5279.29	-0.2	2.35
	2.4	2		0.0122973	-0.25	2.3375			0.00515276	-0.4375	2.29062			19720	0.25	2.4625			0.0360528	0	2.4			0.919188	-0.333333	2.31667			0.159222	-0.384615	2.30385			4768.75	-0.133333	2.36667
	2.4	2		0.0176799	0	2.4			0.00573265	0.333333	2.48333			23619.5	0	2.4			0.0450659	-0.25	2.3375			0.905266	-0.222222	2.34444			0.125588	0	2.4			4397.13	0.0588235	2.41471
	2.4	2		0.00504658	0.25	2.4625			0.00636225	0.333333	2.48333			20811.6	-0.15	2.3625			0.0360528	0.111111	2.42778			0.918203	-0.222222	2.34444			0.154583	-0.111111	2.37222			7037.88	-0.15	2.3625
	2.4	2		0.0158059	-0.333333	2.31667			0.00405925	-0.416667	2.29583			42794.3	0	2.4			0.0380244	0.2	2.45			0.930906	0	2.4			0.132315	0.25	2.4625			11549.3	-0.25	2.3375
	2.4	2		0.0173886	0.333333	2.48333			0.00733978	0.333333	2.48333			31696.9	0	2.4			0.0454304	0.25	2.4625			0.936625	0	2.4			0.155627	0	2.4			11739.2	0.25	2.4625
	2.4	2		0.00916937	0.0833333	2.42083			0.00371131	-0.1875	2.35312			39348.2	0	2.4			0.0327059	0	2.4			0.916828	-0.222222	2.34444			0.151783	0	2.4			9885.93	-0.333333	2.31667
	2.4	2		0.00168615	0	2.4			0.00671019	-0.333333	2.31667			20871	-0.05	2.3875			0.0350918	-0.1875	2.35312			0.901344	0.125	2.43125			0.171516	0	2.4			3548.41	0.230769	2.45769
	2.4	2		0.00472245	0	2.4			0.00449003	0.1875	2.44687			24977.7	-0.1875	2.35312			0.0293757	-0.25	2.3375			0.919562	-0.111111	2.37222			0.142173	0.125	2.43125			14911.7	0.333333	2.48333
	2.4	2		0.0113328	-0.4	2.3			0.00603088	0	2.4			20906.2	0.05	2.4125			0.0380907	0.4	2.5			0.926922	-0.25	2.3375			0.161326	-0.307692	2.32308			7664.84	-0.05	2.3875
	2.4	2		0.00873046	0	2.4			0.00768772	0.25	2.4625			29955.6	0	2.4			0.0398138	0.125	2.43125			0.917016	-0.111111	2.37222			0.174515	0	2.4			6685.43	-0.09375	2.37656
	2.4	2		0.0139891	0.125	2.43125			0.00525217	-0.142857	2.36429			29958.5	0.333333	2.48333			0.0385214	-0.333333	2.31667			0.915453	0	2.4			0.15672	-0.375	2.30625			7446.19	0.05	2.4125
	2.4	2		0.00858302	0.2	2.45			0.00584863	0.0833333	2.42083			28632.9	0	2.4			0.0347439	-0.0625	2.38437			0.918906	0	2.4			0.162105	-0.35	2.3125			10930.5	-0.333333	2.31667
	2.4	2		0.00800218	0	2.4			0.00337995	0.111111	2.42778			20813.4	0.15	2.4375			0.0302704	-0.208333	2.34792			0.901656	-0.0833333	2.37917			0.149579	0	2.4			6815.04	-0.03125	2.39219
	2.4	2		0.0117414	-0.15	2.3625			0.00515276	-0.3125	2.32187			28858.1	0.111111	2.42778			0.0369972	-0.222222	2.34444			0.911312	-0.1875	2.35312			0.160332	-0.230769	2.34231			8332.32	-0.2	2.35
	2.4	2		0.015996	0	2.4			0.00700842	0	2.4			26835.2	-0.125	2.36875			0.0447511	0.25	2.4625			0.917063	0.111111	2.42778			0.16565	0	2.4			6580.49	0.03125	2.40781
	2.4	2		0.0117879	-0.05	2.3875			0.00545099	0	2.4			30896.3	-0.4	2.3			0.0391179	0	2.4			0.910344	-0.0625	2.38437			0.154765	0.111111	2.42778			9956.03	0	2.4
	2.4	2		0.0110947	-0.2	2.35			0.00531844	0.142857	2.43571			30965.6	-0.2	2.35			0.0366989	-0.111111	2.37222			0.913141	0.153846	2.43846			0.157681	-0.125	2.36875			10259.4	0.333333	2.48333
	2.4	2		0.0123478	0.25	2.4625			0.00488767	0.0833333	2.42083			36013.3	-0.125	2.36875			0.0343793	0.0833333	2.42083			0.897172	0.375	2.49375			0.161724	-0.25	2.3375			4179.96	0.117647	2.42941
	2.4	2		0.0148715	0.25	2.4625			0.003877	0.0625	2.41562			32400.7	0	2.4			0.036848	0	2.4			0.917312	0.111111	2.42778			0.163795	-0.15	2.3625			7091.47	0.15	2.4375
	2.4	2		0.0164433	0.125	2.43125			0.00516933	-0.1875	2.35312			27778.7	-0.285714	2.32857			0.0408244	0.333333	2.48333			0.921984	-0.0833333	2.37917			0.135711	0.0833333	2.42083			17955.1	0	2.4
	2.4	2		0.0156526	0.333333	2.48333			0.00593147	0.25	2.4625			28603.6	0.222222	2.45556			0.0420174	0.125	2.43125			0.918094	0.222222	2.45556			0.161525	-0.153846	2.36154			7057.69	0.25	2.4625
	2.4	2		0.0133198	0.375	2.49375			0.00485453	0.25	2.4625			35830.1	0.125	2.43125			0.0387865	0.333333	2.48333			0.918719	0.333333	2.48333			0.150822	0.142857	2.43571			6898.16	0.09375	2.42344
	2.4	2		0.0111085	0	2.4			0.00379415	0.1875	2.44687			35160.7	-0.333333	2.31667			0.0362184	0.222222	2.45556			0.914016	0.230769	2.45769			0.147392	0	2.4			8372.84	0	2.4
	2.4	2		0.0118913	0.05	2.4125			0.00414209	-0.25	2.3375			35218.2	0	2.4			0.0372788	0.111111	2.42778			0.913594	0.307692	2.47692			0.145404	-0.0833333	2.37917			8575.89	0.2	2.45
	2.4	2		0.010448	-0.0625	2.38437			0.00346279	-0.0625	2.38437			30520	0	2.4			0.0319935	0.142857	2.43571			0.911156	0.0625	2.41562			0.155047	0.222222	2.45556			7092.45	0.35	2.4875
	2.4	2		0.00911448	0.25	2.4625			0.00599775	0.416667	2.50417			25085.8	-0.0625	2.38437			0.0363344	0.333333	2.48333			0.919875	0.0833333	2.42083			0.16237	-0.05	2.3875			6586.24	0.15625	2.43906
	2.4	2		0.0057782	0	2.4			0.00314799	0	2.4			30656.7	0.2	2.45			0.0289946	-0.0833333	2.37917			0.906797	-0.0909091	2.37727			0.158278	0.125	2.43125			6257.25	0.21875	2.45469
	2.4	2		0.0101586	0.0625	2.41562			0.0041918	-0.0833333	2.37917			27258.8	-0.142857	2.36429			0.0324574	0.285714	2.47143			0.907422	0	2.4			0.163049	0.05	2.4125			5341.62	-0.0666667	2.38333
	2.4	2		0.00699038	0.125	2.43125			0.00435748	-0.25	2.3375			24602.6	0.0625	2.41562			0.0304692	-0.125	2.36875			0.899297	0.375	2.49375			0.171052	0.2	2.45			3955.95	0.176471	2.44412
	2.4	2		0.0138574	0.375	2.49375			0.00619657	0.333333	2.48333			28217	0.333333	2.48333			0.0398469	0.375	2.49375			0.905453	-0.111111	2.37222			0.171267	0.4	2.5			3213.01	0.307692	2.47692
	2.4	2		0.00586504	0.2	2.45			0.00674332	0	2.4			27532.4	0	2.4			0.0372622	0.222222	2.45556			0.907234	0.0909091	2.42273			0.167755	0	2.4			5257.45	0	2.4
	2.4	2		0.0165717	0.375	2.49375			0.00810193	0	2.4			32038.4	0.333333	2.48333			0.0494897	0	2.4			0.920875	0.25	2.4625			0.162469	0.15	2.4375			4897.9	0.0666667	2.41667
	2.4	2		0.0108007	0	2.4			0.00364504	0.0625	2.41562			37123.5	0	2.4			0.0331533	0.125	2.43125			0.909484	0.1875	2.44687			0.142422	0.375	2.49375			5874.79	-0.111111	2.37222
	2.4	2		0.00621037	0.25	2.4625			0.00420836	0.0833333	2.42083			25858.3	0.25	2.4625			0.0297402	0.0833333	2.42083			0.906109	0	2.4			0.163845	0.25	2.4625			4049.38	0.235294	2.45882
	2.4	2		0.0102647	0.1875	2.44687			0.00422493	-0.0833333	2.37917			25980.5	0.35	2.4875			0.0349427	0.0625	2.41562			0.919984	0.416667	2.50417			0.151948	0.2	2.45			8199.8	0.4	2.5
	2.4	2		0.00446489	0.2	2.45			0.00337995	0.222222	2.45556			24900.1	0.1875	2.44687			0.0290112	0.25	2.4625			0.887062	-0.25	2.3375			0.155494	0.333333	2.48333			3517.96	0.384615	2.49615
	2.4	2		0.00942373	0.4	2.5			0.00513619	-0.0625	2.38437			26025.1	0.45	2.5125			0.033435	0.375	2.49375			0.915	0.222222	2.45556			0.159669	-0.0769231	2.38077			4859.45	0.133333	2.43333
	2.4	2		0.00736331	-0.2	2.35			0.00500365	0.0625	2.41562			21709.3	-0.142857	2.36429			0.0302373	-0.0416667	2.38958			0.908031	0.181818	2.44545			0.172427	0.375	2.49375			5530.14	0	2.4
	2.4	2		0.0120923	0.15	2.4375			0.00513619	0.1875	2.44687			34092.1	-0.25	2.3375			0.0356882	0.444444	2.51111			0.929031	0	2.4			0.136822	0.333333	2.48333			12872	0.25	2.4625
	2.4	2		0.00380719	0	2.4			0.00366161	0.1875	2.44687			34477.1	0.25	2.4625			0.0263271	0	2.4			0.886016	0.25	2.4625			0.148022	0.142857	2.43571			3080.78	0.461538	2.51538
	2.4	2		0.0104041	0.3125	2.47812			0.00432434	0.0833333	2.42083			30547.3	0.4	2.5			0.0341971	0.25	2.4625			0.90575	0.111111	2.42778			0.162734	0.35	2.4875			3868.83	0.294118	2.47353
	2.4	2		0.0101639	0.4375	2.50937			0.00354563	0.3125	2.47812			22325.8	0	2.4			0.0307509	0.0416667	2.41042			0.912219	0.384615	2.49615			0.144194	0.0833333	2.42083			5428.79	0.111111	2.42778
	2.4	2		0.010709	0.333333	2.48333			0.00414209	0.25	2.4625			26532.9	0.125	2.43125			0.0339983	0.416667	2.50417			0.905656	0.222222	2.45556			0.148486	0.285714	2.47143			6304.61	0.28125	2.47031
	2.4	2		0.0118112	0.25	2.4625			0.00457287	0.3125	2.47812			27670.1	0.142857	2.43571			0.0354232	0.1875	2.44687			0.911844	0.3125	2.47812			0.159719	0	2.4			5666.88	0.222222	2.45556
	2.4	2		0.011073	0.2	2.45			0.00447346	0.25	2.4625			27862.7	0.285714	2.47143			0.035506	0.3125	2.47812			0.912594	0.461538	2.51538			0.160349	0.0769231	2.41923			5219.54	0.2	2.45
	2.4	2		0.00763889	0	2.4			0.00442375	0.416667	2.50417			25205.2	0.3125	2.47812			0.0308669	0.125	2.43125			0.909328	0.272727	2.46818			0.165369	0.333333	2.48333			4474.38	0.352941	2.48824
	2.4	2		0.00789131	0.2	2.45			0.00334681	0.333333	2.48333			34877.4	0.333333	2.48333			0.0299225	0.208333	2.45208			0.902359	0.0833333	2.42083			0.147276	0.428571	2.50714			5501.28	0.333333	2.48333
	2.4	2		0.0119855	0.35	2.4875			0.00500365	0.3125	2.47812			37248	0.333333	2.48333			0.0373119	0.333333	2.48333			0.914984	0.333333	2.48333			0.144476	0.25	2.4625			11107.4	0	2.4
	2.4	2		0.00556919	0.4	2.5			0.00543442	0.285714	2.47143			20935.6	0.25	2.4625			0.0322752	0.428571	2.50714			0.928344	0.333333	2.48333			0.152396	0.4	2.5			11101.3	0.333333	2.48333
	2.4	2		0.00232075	-0.25	2.3375			0.00546756	0.428571	2.50714			20517.4	0.416667	2.50417			0.0304692	0.291667	2.47292			0.882766	0	2.4			0.159785	0.153846	2.43846			20091.3	0	2.4
	2.4	2		0.0039204	0.333333	2.48333			0.00308172	0.2	2.45			28477	0.444444	2.51111			0.0226489	0.25	2.4625			0.896078	0.4	2.5			0.150258	0.285714	2.47143			5987.48	0.444444	2.51111
	2.4	2		0.00441403	0.4	2.5			0.00472198	0.4375	2.50937			23917.4	0.333333	2.48333			0.0300219	0.375	2.49375			0.901734	0.25	2.4625			0.160282	0.230769	2.45769			4267.79	0.411765	2.50294
	2.4	2		0.00366925	0.25	2.4625			0.00497051	0.416667	2.50417			26831.3	0.375	2.49375			0.0280337	-0.333333	2.31667			0.907062	0.363636	2.49091			0.160249	0.307692	2.47692			5139.96	0.266667	2.46667
	2.4	3		0.00925722	0.416667	2.50417			0.00376102	0.3125	2.47812			36250.5	0.375	2.49375			0.0355226	0.4375	2.50937			0.906953	0.454545	2.51364			0.134452	0.25	2.4625			7329.89	0.45	2.5125
	2.4	3		0.0116548	0.45	2.5125			0.00666048	0.333333	2.48333			22147.4	0.142857	2.43571			0.0415203	0.375	2.49375			0.927188	0.25	2.4625			0.160862	0.384615	2.49615			6953.84	0.34375	2.48594
	2.4	3		0.00825991	0.4	2.5			0.00377759	0.4375	2.50937			21130.6	0.35	2.4875			0.0295745	0.416667	2.50417			0.918438	0.444444	2.51111			0.156356	0.444444	2.51111			6541.09	0.40625	2.50156
	2.4	3		0.00220266	0.25	2.4625			0.00278348	0.25	2.4625			27369.5	0.428571	2.50714			0.024604	0.25	2.4625			0.878719	0	2.4			0.126748	0.333333	2.48333			25166.3	0	2.4
	2.4	3		0.0112595	0.4	2.5			0.00503678	0.4375	2.50937			17509	0	2.4			0.0371628	0.444444	2.51111			0.915203	0.444444	2.51111			0.160249	0.461538	2.51538			3955.13	0.470588	2.51765
	2.4	3		0.0075842	0.2	2.45			0.00313142	0.4	2.5			22004	0.285714	2.47143			0.0277851	0	2.4			0.903672	0.416667	2.50417			0.149347	0.428571	2.50714			6479.62	0.46875	2.51719
	2.4	3		0.00288737	0.25	2.4625			0.00270064	0.416667	2.50417			25339.5	0.4375	2.50937			0.020843	0	2.4			0.890859	0.333333	2.48333			0.134452	0.416667	2.50417			5105.53	0.333333	2.48333
	2.4	3		0.00708743	0.375	2.49375			0.00407582	0.416667	2.50417			20920.5	0.45	2.5125			0.0286964	0	2.4			0.906016	0.333333	2.48333			0.16295	0.45	2.5125			5070.01	0.4	2.5
	2.4	3		0.00752505	0.4	2.5			0.00364504	0.4375	2.50937			19300.7	0.25	2.4625			0.0300881	0.458333	2.51458			0.911875	0.4375	2.50937			0.145586	0.416667	2.50417			8685.24	0	2.4
	2.4	3		0.00801515	0.4	2.5			0.00339651	0.444444	2.51111			21974.8	0.428571	2.50714			0.0288952	0.333333	2.48333			0.904375	0.444444	2.51111			0.157267	0.375	2.49375			4628.46	0.466667	2.51667
				1					2					3					4					5					6					7
			min	0.000331367					0.00192193					9610.95					0.0180098					0.842219					0.10511					1943.43
			25 percentile	0.00253846					0.00294917					15815.2					0.0239164					0.880758					0.140591					3192.99
			median	0.00466304					0.00352906					17988.5					0.0264597					0.888062					0.148171					3919.51
			75 percentile	0.00661418					0.00401783					20855.4					0.0291437					0.899992					0.156389					5425.69
			maximum	0.0110254					0.00637882					29739.3					0.0355557					0.913906					0.167854					39300
			min	8.28418e-05					0.00248525					11044.7					0.0220691					0.870156					0.104281					1816.82
			25 percentile	0.00177585					0.00494566					18145.1					0.0282698					0.893965					0.150785					3277.23
			median	0.00301883					0.00556697					22094.3					0.0311817					0.901883					0.159106					3913.11
			75 percentile	0.00503448					0.0065735					25422					0.0342551					0.909805					0.167108					5461.61
			maximum	0.0197433					0.0112665					38706					0.0456293					0.935891					0.181705					20025.9
			min	0.00122483					0.00205448					14526.8					0.020843					0.858703					0.101879					1696.36
			25 percentile	0.00699038					0.00364504					22004					0.0306018					0.902359					0.142422					4200.73
			median	0.00953883					0.00458944					26075.3					0.0347439					0.910344					0.153274					5666.88
			75 percentile	0.0119855					0.00546756					30547.3					0.0380244					0.917016					0.161525					7329.89
			maximum	0.0180314					0.00970906					42794.3					0.0494897					0.936625					0.178027					26332
				0.000331367					0.00192193					9610.95					0.0180098					0.842219					0.10511					1943.43
				0.00220709					0.00102724					6204.22					0.00590662					0.0385391					0.0354811					1249.56
				0.00212458					0.000579893					2173.35					0.00254324					0.00730469					0.00758003					726.517
				0.00195113					0.000488767					2866.9					0.00268407					0.0119297					0.00821791					1506.18
				0.00441126					0.00236099					8883.88					0.00641196					0.0139141					0.0114653					33874.3
				8.28418e-05					0.00248525					11044.7					0.0220691					0.870156					0.104281					1816.82
				0.00169301					0.0024604					7100.45					0.00620071					0.0238086					0.0465032					1460.42
				0.00124297					0.000621314					3949.22					0.00291189					0.00791797					0.00832146					635.875
				0.00201565					0.00100653					3327.7					0.00307343					0.00792187					0.00800252					1548.5
				0.0147088					0.00469299					13284					0.0113742					0.0260859					0.0145967					14564.3
				0.00122483					0.00205448					14526.8					0.020843					0.858703					0.101879					1696.36
				0.00576555					0.00159056					7477.14					0.00975876					0.0436562					0.0405428					2504.37
				0.00254845					0.000944397					4071.36					0.00414209					0.00798438					0.0108523					1466.16
				0.00244664					0.000878123					4471.98					0.00328054					0.00667187					0.00825104					1663.01
				0.00604594					0.0042415					12247					0.0114653					0.0196094					0.0165021					19002.1
				10000	10000	0.01	10000	1000	1000	0.01
				0.000331367	0.00192193	9610.95	0.0180098	0.842219	0.10511	1943.43							3.31367	19.2193	96.1095	180.098	842.219	105.11	19.4343
				0.00220709	0.00102724	6204.22	0.00590662	0.0385391	0.0354811	1249.56							22.0709	10.2724	62.0422	59.0662	38.5391	35.4811	12.4956
				0.00212458	0.000579893	2173.35	0.00254324	0.00730469	0.00758003	726.517							21.2458	5.79893	21.7335	25.4324	7.30469	7.58003	7.26517
				0.00195113	0.000488767	2866.9	0.00268407	0.0119297	0.00821791	1506.18							19.5113	4.88767	28.669	26.8407	11.9297	8.21791	15.0618
				0.00441126	0.00236099	8883.88	0.00641196	0.0139141	0.0114653	33874.3							44.1126	23.6099	88.8388	64.1196	13.9141	11.4653	338.743
				0	0	0	0	0	0	0
				0	0	0	0	0	0	0
				8.28418e-05	0.00248525	11044.7	0.0220691	0.870156	0.104281	1816.82							0.828418	24.8525	110.447	220.691	870.156	104.281	18.1682
				0.00169301	0.0024604	7100.45	0.00620071	0.0238086	0.0465032	1460.42							16.9301	24.604	71.0045	62.0071	23.8086	46.5032	14.6042
				0.00124297	0.000621314	3949.22	0.00291189	0.00791797	0.00832146	635.875							12.4297	6.21314	39.4922	29.1189	7.91797	8.32146	6.35875
				0.00201565	0.00100653	3327.7	0.00307343	0.00792187	0.00800252	1548.5							20.1565	10.0653	33.277	30.7343	7.92187	8.00252	15.485
				0.0147088	0.00469299	13284	0.0113742	0.0260859	0.0145967	14564.3							147.088	46.9299	132.84	113.742	26.0859	14.5967	145.643
				0	0	0	0	0	0	0
				0	0	0	0	0	0	0
				0.00122483	0.00205448	14526.8	0.020843	0.858703	0.101879	1696.36							12.2483	20.5448	145.268	208.43	858.703	101.879	16.9636
				0.00576555	0.00159056	7477.14	0.00975876	0.0436562	0.0405428	2504.37							57.6555	15.9056	74.7714	97.5876	43.6562	40.5428	25.0437
				0.00254845	0.000944397	4071.36	0.00414209	0.00798438	0.0108523	1466.16							25.4845	9.44397	40.7136	41.4209	7.98438	10.8523	14.6616
				0.00244664	0.000878123	4471.98	0.00328054	0.00667187	0.00825104	1663.01							24.4664	8.78123	44.7198	32.8054	6.67187	8.25104	16.6301
				0.00604594	0.0042415	12247	0.0114653	0.0196094	0.0165021	19002.1							60.4594	42.415	122.47	114.653	19.6094	16.5021	190.021
		0.000331367	8.28418e-05	0.00122483
		0.00220709	0.00169301	0.00576555
1		0.00212458	0.00124297	0.00254845
GLRLM (HGRE(135))		0.00195113	0.00201565	0.00244664
		0.00441126	0.0147088	0.00604594
		0.00192193	0.00248525	0.00205448
		0.00102724	0.0024604	0.00159056
2		0.000579893	0.000621314	0.000944397
		0.000488767	0.00100653	0.000878123
		0.00236099	0.00469299	0.0042415
		9610.95	11044.7	14526.8
		6204.22	7100.45	7477.14
3		2173.35	3949.22	4071.36
		2866.9	3327.7	4471.98
		8883.88	13284	12247
		0.0180098	0.0220691	0.020843
		0.00590662	0.00620071	0.00975876
4		0.00254324	0.00291189	0.00414209
		0.00268407	0.00307343	0.00328054
		0.00641196	0.0113742	0.0114653
		0.842219	0.870156	0.858703
		0.0385391	0.0238086	0.0436562
5		0.00730469	0.00791797	0.00798438
		0.0119297	0.00792187	0.00667187
		0.0139141	0.0260859	0.0196094
		0.10511	0.104281	0.101879
		0.0354811	0.0465032	0.0405428
6		0.00758003	0.00832146	0.0108523
		0.00821791	0.00800252	0.00825104
		0.0114653	0.0145967	0.0165021
		1943.43	1816.82	1696.36
		1249.56	1460.42	2504.37
7		726.517	635.875	1466.16
		1506.18	1548.5	1663.01
		33874.3	14564.3	19002.1
		6.83131e-05
