# Supplementary material for: Characterization of interstitial diffuse fibrosis patterns using texture analysis of myocardial native T1 mapping
Source: PLoS One. 2020 Jun 1;15(6):e0233694. doi: 10.1371/journal.pone.0233694 (PMC7263579; doi:10.1371/journal.pone.0233694)
Supplement: S3 Data — (XLSX) [file pone.0233694.s007.xlsx]

## Sheet: Reproducibility TF Plots
		Intra-observer reproducibility																								Inter-observer reproducibility
		Reader1 - 1st Segmentation											Reader1 - 2nd Segmentation													Reader1 - 1st Segmentation											Reader2 - 1st Segmentation
class	Features>	1	2	3	4	5	6	7				Features>	1	2	3	4	5	6	7					class	Features>	1	2	3	4	5	6	7				Features>	1	2	3	4	5	6	7
1	1	0.00993606	0.0026178	20371.1	0.0319272	0.820688	0.0897177	4109.88				1	0.00868538	0.00311485	21451.8	0.0324243	0.8425	0.123235	4768.92					1	1	0.00993606	0.0026178	20371.1	0.0319272	0.820688	0.0897177	4109.88				1	0.0088266	0.00270064	20378	0.0327391	0.820375	0.0917556	4088.76
1	2	0.000861714	0.00228643	25173.1	0.023146	0.837406	0.0902976	14316.1				2	0.00300066	0.00301544	27190.6	0.0212406	0.884437	0.11341	10484.7					1	2	0.000861714	0.00228643	25173.1	0.023146	0.837406	0.0902976	14316.1				2	0.0009262	0.00226987	25099.7	0.0237425	0.836281	0.090397	14300.7
1	3	0.00749872	0.00384386	11836.5	0.0319935	0.883922	0.110213	9841.31				3	0.00682369	0.00400954	12298.7	0.0320598	0.888453	0.113808	10475.9					1	3	0.00749872	0.00384386	11836.5	0.0319935	0.883922	0.110213	9841.31				3	0.00724947	0.00386043	11810	0.0313308	0.883188	0.109219	9763.53
1	4	0.00835836	0.0035622	19388.2	0.0346444	0.867563	0.112201	3845.5				4	0.00580548	0.00386043	20968.5	0.0294585	0.887938	0.131718	6355.06					1	4	0.00835836	0.0035622	19388.2	0.0346444	0.867563	0.112201	3845.5				4	0.00774755	0.00349592	19342.7	0.0345285	0.867078	0.112449	3847.76
1	5	0.0114373	0.00248525	17583.5	0.0349592	0.886312	0.0892538	4954.22				5	0.0112176	0.00314799	19680.8	0.0339651	0.905469	0.131354	7993.28					1	5	0.0114373	0.00248525	17583.5	0.0349592	0.886312	0.0892538	4954.22				5	0.0134737	0.00260123	17549.6	0.0335509	0.884016	0.090049	5024.95
1	6	0.0114613	0.00553383	14374.6	0.03877	0.892328	0.129465	2677.97				6	0.00945916	0.00571608	15833.6	0.0367155	0.906469	0.151319	3580.29					1	6	0.0114613	0.00553383	14374.6	0.03877	0.892328	0.129465	2677.97				6	0.0101824	0.00558354	14336	0.0382398	0.892047	0.12925	2668.93
1	7	0.0104864	0.00407582	19343.4	0.0352906	0.882	0.121927	3186.11				7	0.00810078	0.00465571	20838.1	0.0338989	0.891359	0.145967	5671.73					1	7	0.0104864	0.00407582	19343.4	0.0352906	0.882	0.121927	3186.11				7	0.0103979	0.00405925	19325.5	0.0358539	0.881687	0.121131	3154.28
1	8	0.00649514	0.0032474	21235.2	0.0299722	0.880984	0.100504	3245.04				8	0.00407797	0.00472198	24610.2	0.0280337	0.895969	0.140583	4728.74					1	8	0.00649514	0.0032474	21235.2	0.0299722	0.880984	0.100504	3245.04				8	0.00592883	0.00313142	21271.3	0.0309663	0.88175	0.101415	3244.85
1	9	0.00221948	0.00215389	21209.3	0.0223507	0.859641	0.101249	8149.38				9	0.00255201	0.00284976	24707.4	0.0218537	0.88575	0.107181	11678.8					1	9	0.00221948	0.00215389	21209.3	0.0223507	0.859641	0.101249	8149.38				9	0.00158685	0.00210418	21283.8	0.0227815	0.85825	0.100222	8203.34			10
1	10	0.00611842	0.0041918	17746.1	0.0311982	0.870078	0.12186	4558.54				10	0.00347075	0.00480482	17970.4	0.0295248	0.891078	0.134618	5782.58					1	10	0.00611842	0.0041918	17746.1	0.0311982	0.870078	0.12186	4558.54				10	0.00594825	0.00405925	17706.3	0.0307012	0.870906	0.123302	4557.53
1	11	0.00677368	0.00286633	21526.7	0.0307012	0.811922	0.110279	3017.93				11	0.00377908	0.0032971	25283.3	0.025333	0.873266	0.12973	4122.7					1	11	0.00677368	0.00286633	21526.7	0.0307012	0.811922	0.110279	3017.93				11	0.00619245	0.00288289	21537.1	0.0287295	0.812766	0.109848	2999.78
1	12	0.00781537	0.00266751	22112	0.0274703	0.822531	0.0993936	2748.29				12	0.00661578	0.00318113	23709.9	0.0267082	0.839125	0.120618	3872.6					1	12	0.00781537	0.00266751	22112	0.0274703	0.822531	0.0993936	2748.29				12	0.00775259	0.00276692	22165.1	0.0271721	0.821641	0.0997415	2752.18
1	13	0.00847581	0.00367818	21114.8	0.0313308	0.881828	0.0985983	5439.65				13	0.00919681	0.00427464	23927.5	0.0312976	0.901016	0.128173	7581.82					1	13	0.00847581	0.00367818	21114.8	0.0313308	0.881828	0.0985983	5439.65				13	0.00774551	0.00369474	21133.5	0.031629	0.879812	0.100951	5438.02
2	14	0.0137153	0.00656107	18447.8	0.0412221	0.908266	0.141229	5476.2				14	0.0113243	0.00702499	18662.6	0.0419677	0.912172	0.152876	5364.69					2	14	0.0137153	0.00656107	18447.8	0.0412221	0.908266	0.141229	5476.2				14	0.0132919	0.00664391	18479.7	0.0435417	0.909453	0.137468	5486.63
2	15	0.00514444	0.00548413	32581.2	0.0343959	0.885234	0.11462	3546.45				15	0.00374844	0.00574922	32530.7	0.0314467	0.896234	0.125986	5185.33					2	15	0.00514444	0.00548413	32581.2	0.0343959	0.885234	0.11462	3546.45				15	0.00519161	0.00551726	32566.9	0.035506	0.885312	0.115399	3543.57
2	16	0.00411046	0.00627941	20243	0.0349095	0.916844	0.138926	5590.97				16	0.00224512	0.00883094	21388.7	0.0394824	0.927453	0.163513	8531.81					2	16	0.00411046	0.00627941	20243	0.0349095	0.916844	0.138926	5590.97				16	0.00261024	0.00707469	21219.4	0.0358042	0.921547	0.145305	7233.15
2	17	0.0078105	0.00614686	16723.6	0.0364007	0.899125	0.127162	3929.89				17	0.0069954	0.00671019	17990.9	0.0373782	0.907328	0.151087	4259.21					2	17	0.0078105	0.00614686	16723.6	0.0364007	0.899125	0.127162	3929.89				17	0.00907744	0.00601432	16670.6	0.0376267	0.897906	0.125605	3936.41
2	18	0.00433715	0.00289946	14100.6	0.0209755	0.819203	0.101481	2910.08				18	0.00252019	0.0035622	15453.1	0.022914	0.881922	0.119607	4540.56					2	18	0.00433715	0.00289946	14100.6	0.0209755	0.819203	0.101481	2910.08				18	0.00446956	0.00288289	14087.8	0.0209755	0.819094	0.101117	2916.19
2	19	0.00733636	0.00429121	22228.8	0.0307343	0.876766	0.125141	5004.03				19	0.00515279	0.00561667	22074.9	0.0298893	0.886844	0.146497	4233.52					2	19	0.00733636	0.00429121	22228.8	0.0307343	0.876766	0.125141	5004.03				19	0.00750984	0.00412552	22210.4	0.0299225	0.876266	0.125141	5013.59
2	20	0.0091657	0.00627941	21818.2	0.034545	0.883547	0.141544	3403.83				20	0.00568314	0.00778713	22800	0.0346444	0.901875	0.152711	5541.75					2	20	0.0091657	0.00627941	21818.2	0.034545	0.883547	0.141544	3403.83				20	0.00937602	0.0062297	21842.8	0.034545	0.883719	0.141825	3411.57
2	21	0.00683151	0.00669362	18115.9	0.0365498	0.91175	0.147674	3463.42				21	0.00396894	0.00778713	18947	0.0378256	0.913172	0.15735	4278.08					2	21	0.00683151	0.00669362	18115.9	0.0365498	0.91175	0.147674	3463.42				21	0.00678302	0.00672675	18113.4	0.036848	0.910219	0.148005	3456.74
2	22	0.0073413	0.00477169	13896	0.0345119	0.887281	0.125953	5038.42				22	0.00408322	0.00535158	14417.1	0.033203	0.899094	0.140384	5963.03					2	22	0.0073413	0.00477169	13896	0.0345119	0.887281	0.125953	5038.42				22	0.0064129	0.00467228	13886.1	0.0347604	0.88675	0.129299	5032.27
2	23	0.00546043	0.00560011	17444.6	0.0354397	0.86175	0.144344	1698.84				23	0.003732	0.00588177	18286	0.0329379	0.880437	0.152744	2332.54					2	23	0.00546043	0.00560011	17444.6	0.0354397	0.86175	0.144344	1698.84				23	0.00601724	0.00545099	17428.7	0.0360196	0.860359	0.142736	1695.66			11
2	24	0.00621879	0.00671019	24641.8	0.0372291	0.894047	0.146547	3346.54				24	0.0038327	0.0071244	25219.4	0.0343296	0.893766	0.152876	4310.51					2	24	0.00621879	0.00671019	24641.8	0.0372291	0.894047	0.146547	3346.54				24	0.00625723	0.00675989	24648.8	0.0369143	0.892875	0.146879	3369.51
2	25	0.00721104	0.00510306	22772.1	0.0308834	0.912453	0.108606	7808.88				25	0.00412818	0.0052356	24993.8	0.0308669	0.917844	0.123517	8135.75					2	25	0.00721104	0.00510306	22772.1	0.0308834	0.912453	0.108606	7808.88				25	0.00753882	0.00503678	22811.4	0.0307343	0.912969	0.109351	7811.75
2	26	0.00719197	0.00707469	21385.5	0.0358539	0.89	0.150142	3078.18				26	0.00344387	0.00767115	21544.1	0.0362516	0.901578	0.166926	2857.1					2	26	0.00719197	0.00707469	21385.5	0.0358539	0.89	0.150142	3078.18				26	0.00723066	0.00707469	21370.3	0.036119	0.889047	0.150756	3062.87
2	27	0.00878262	0.00463914	27293	0.0354066	0.881016	0.131271	2774.35				27	0.00716821	0.00581549	28404.8	0.0355391	0.886094	0.146547	3279.75					2	27	0.00878262	0.00463914	27293	0.0354066	0.881016	0.131271	2774.35				27	0.00948249	0.00465571	27249.5	0.0357048	0.882031	0.132447	2770.15
2	28	0.00941004	0.00359533	17907	0.0366492	0.873766	0.113957	2934.05				28	0.00821157	0.00432434	20921.7	0.0348598	0.896344	0.140119	5473.53					2	28	0.00941004	0.00359533	17907	0.0366492	0.873766	0.113957	2934.05				28	0.00991199	0.00379415	17915.2	0.0356385	0.872484	0.114206	2935.53
2	29	0.00900734	0.00571608	19981.8	0.0355888	0.875219	0.129565	2097.72				29	0.00422958	0.00613029	21325.8	0.0335509	0.894078	0.150871	3662.67					2	29	0.00900734	0.00571608	19981.8	0.0355888	0.875219	0.129565	2097.72				29	0.00921144	0.00560011	19987.1	0.0358208	0.875062	0.129614	2103.66
2	30	0.00567258	0.0049208	18387	0.0330539	0.887594	0.119226	3606.91				30	0.00624396	0.00614686	19721.6	0.0347107	0.904719	0.134204	5897.54					2	30	0.00567258	0.0049208	18387	0.0330539	0.887594	0.119226	3606.91				30	0.00546354	0.00511962	18418.2	0.0323911	0.885797	0.121247	3639.24
2	31	0.00160611	0.00608059	17337.9	0.0291769	0.862781	0.140765	2362.54				31	0.00520194	0.00656107	17897.8	0.0325237	0.886406	0.147823	2859.13					2	31	0.00160611	0.00608059	17337.9	0.0291769	0.862781	0.140765	2362.54				31	0.0016833	0.00594804	17324	0.0297071	0.861609	0.140417	2362.01
2	32	0.00327367	0.00412552	31805.2	0.0306183	0.887828	0.105888	11300.1				32	0.00182891	0.00493737	30786.2	0.0268573	0.896172	0.119557	11439.6					2	32	0.00327367	0.00412552	31805.2	0.0306183	0.887828	0.105888	11300.1				32	0.00282057	0.00412552	31711.4	0.031513	0.888141	0.104729	11330.7
2	33	0.00241949	0.00684273	17936.4	0.0319272	0.897687	0.136904	7343.86				33	0.00648289	0.00830075	17615.6	0.0361853	0.907438	0.142057	7789.54					2	33	0.00241949	0.00684273	17936.4	0.0319272	0.897687	0.136904	7343.86				33	0.0021491	0.00667705	17916.4	0.0312148	0.89625	0.137219	7363.14
2	34	0.00697434	0.0055007	20685.1	0.0337995	0.894	0.117967	4025.73				34	0.00506908	0.00725694	21793.2	0.034048	0.909	0.14161	5202.94					2	34	0.00697434	0.0055007	20685.1	0.0337995	0.894	0.117967	4025.73				34	0.0077245	0.0055007	20673.9	0.0346941	0.893188	0.116476	4019.23
2	35	0.00563568	0.00831732	19053.5	0.0407913	0.900438	0.139191	3338.2				35	0.000865528	0.00912917	19597.7	0.0419511	0.915344	0.152611	4322.04					2	35	0.00563568	0.00831732	19053.5	0.0407913	0.900438	0.139191	3338.2				35	0.00524294	0.00818477	19076.3	0.0411724	0.903109	0.137667	3343.03
2	36	0.00119752	0.00737292	32433.8	0.0350255	0.877125	0.147889	3071.91				36	0.0040228	0.00883094	32794	0.0350421	0.891172	0.150706	3327.49					2	36	0.00119752	0.00737292	32433.8	0.0350255	0.877125	0.147889	3071.91				36	0.000644465	0.00757174	32422.4	0.0353237	0.877172	0.148337	3071.98
2	37	0.00441058	0.00672675	24062.9	0.0331533	0.872859	0.135844	2119.27				37	0.00722876	0.00730665	24621.2	0.0341971	0.8855	0.13828	2172.14					2	37	0.00441058	0.00672675	24062.9	0.0331533	0.872859	0.135844	2119.27				37	0.00502338	0.00661078	24036.2	0.0333521	0.871375	0.136556	2119.64
2	38	0.00596739	0.00503678	21847.6	0.0314965	0.872719	0.12872	2448.21				38	0.00238504	0.00563324	22704.2	0.0301213	0.886141	0.141096	3307.91					2	38	0.00596739	0.00503678	21847.6	0.0314965	0.872719	0.12872	2448.21				38	0.0051422	0.00503678	21823.4	0.0321095	0.874969	0.126417	2389.48			12
2	39	0.00927557	0.0049208	24508.9	0.0367155	0.889672	0.129084	2936.43				39	0.00623508	0.00634568	24078.4	0.0348764	0.893922	0.154053	4104.32					2	39	0.00927557	0.0049208	24508.9	0.0367155	0.889672	0.129084	2936.43				39	0.0099074	0.00502021	24528.7	0.0383061	0.889156	0.128686	2941.41
2	40	0.00583877	0.00571608	35987.2	0.0318278	0.90275	0.120237	5649.16				40	0.00609756	0.00762145	37082.3	0.0359036	0.920703	0.143913	6594.21					2	40	0.00583877	0.00571608	35987.2	0.0318278	0.90275	0.120237	5649.16				40	0.00550638	0.00578236	35898.6	0.0328716	0.901766	0.120883	5641.16
2	41	0.00656178	0.00682616	19046.7	0.0357048	0.895672	0.149165	2631.64				41	0.00298571	0.00767115	20005.3	0.0332858	0.904406	0.163579	3618.17					2	41	0.00656178	0.00682616	19046.7	0.0357048	0.895672	0.149165	2631.64				41	0.00694944	0.00679303	19034.4	0.0359699	0.895406	0.149795	2610.98
2	42	0.00877593	0.00564981	13854.8	0.0358871	0.864328	0.149679	1223				42	0.00608411	0.00583206	14929.9	0.0317284	0.878437	0.158725	2223.68					2	42	0.00877593	0.00564981	13854.8	0.0358871	0.864328	0.149679	1223				42	0.00921207	0.00571608	13839	0.0351746	0.866078	0.151203	1222.73
2	43	0.008878	0.00757174	18936.3	0.0406422	0.906312	0.158211	3019.63				43	0.00607743	0.00851614	19840.1	0.0397806	0.914359	0.169875	3935.7					2	43	0.008878	0.00757174	18936.3	0.0406422	0.906312	0.158211	3019.63				43	0.00911844	0.00760488	18893	0.0408576	0.905516	0.157399	3020.46
2	44	0.00902392	0.00632911	18571.3	0.0384055	0.906891	0.145338	3019.73				44	0.00612099	0.00735635	19180.8	0.0353072	0.909281	0.158476	3853.28					2	44	0.00902392	0.00632911	18571.3	0.0384055	0.906891	0.145338	3019.73				44	0.00880605	0.00624627	18530.7	0.0374776	0.907078	0.146116	3019.05
2	45	0.00475515	0.00844986	20684.6	0.034661	0.876078	0.156571	1575.9				45	0.00795021	0.00960965	20774.3	0.0364504	0.898141	0.158907	2238.73					2	45	0.00475515	0.00844986	20684.6	0.034661	0.876078	0.156571	1575.9				45	0.00421403	0.00864868	20654.7	0.0343131	0.87525	0.158493	1574.83
2	46	0.00899325	0.00661078	21688	0.0374776	0.910219	0.142471	3670.07				46	0.00658039	0.00727351	22117.1	0.0362019	0.912188	0.157085	4605.9					2	46	0.00899325	0.00661078	21688	0.0374776	0.910219	0.142471	3670.07				46	0.00884889	0.00641196	21694.3	0.036235	0.910344	0.143101	3673.2
2	47	0.00575667	0.00810193	25974.8	0.0386208	0.912281	0.15846	5502.7				47	0.00348968	0.00876466	25288.6	0.0404765	0.912219	0.16242	4548.84					2	47	0.00575667	0.00810193	25974.8	0.0386208	0.912281	0.15846	5502.7				47	0.00565003	0.00821791	25874.4	0.0391179	0.910422	0.159255	5301.65
2	48	0.00582219	0.00536815	18427.8	0.0336503	0.892641	0.143118	3670.99				48	0.00356189	0.00651137	19047.9	0.0309663	0.906625	0.154003	4631.36					2	48	0.00582219	0.00536815	18427.8	0.0336503	0.892641	0.143118	3670.99				48	0.00600593	0.00540129	18458.2	0.0335509	0.892453	0.143615	3667.14
2	49	0.0100896	0.0055007	19055.5	0.0370966	0.915578	0.130128	5658.23				49	0.00649653	0.00642852	19877.8	0.0355226	0.917734	0.150573	6777.55					2	49	0.0100896	0.0055007	19055.5	0.0370966	0.915578	0.130128	5658.23				49	0.0104028	0.00535158	19017.4	0.0378421	0.915	0.129283	5646.12
3	50	0.0169272	0.00442375	32997.8	0.0425807	0.90675	0.13982	7927.23				50	0.0193435	0.00442375	31252.7	0.0449997	0.907359	0.137799	6061.68					3	50	0.0169272	0.00442375	32997.8	0.0425807	0.90675	0.13982	7927.23				50	0.0201334	0.00463914	28289.6	0.0448837	0.904281	0.133856	4871.05
3	51	0.0147502	0.00644509	36766	0.0437239	0.929344	0.113261	16803.6				51	0.0125833	0.0051859	28217.3	0.0379581	0.922937	0.116824	13472.3					3	51	0.0147502	0.00644509	36766	0.0437239	0.929344	0.113261	16803.6				51	0.00489418	0.00450659	25812.7	0.0325237	0.911062	0.105358	9361.99
3	52	0.0188453	0.00593147	26166.3	0.0467393	0.932531	0.121363	16888.1				52	0.0103522	0.00410895	21770.4	0.0364338	0.915953	0.106286	14393.9					3	52	0.0188453	0.00593147	26166.3	0.0467393	0.932531	0.121363	16888.1				52	0.0136489	0.00584863	21270.1	0.0386374	0.923609	0.105673	15147.2
3	53	0.0120801	0.0052356	27218.9	0.038654	0.920672	0.141991	9837.18				53	0.00833046	0.00480482	23501.2	0.0373451	0.912875	0.136391	5846.91					3	53	0.0120801	0.0052356	27218.9	0.038654	0.920672	0.141991	9837.18				53	0.0100206	0.00515276	24770.9	0.0390516	0.907687	0.125025	7450.17			13
3	54	0.0170374	0.00468885	32094.9	0.042183	0.895203	0.132431	7928.71				54	0.0183472	0.00465571	31200.9	0.046292	0.873109	0.12582	11807.9					3	54	0.0170374	0.00468885	32094.9	0.042183	0.895203	0.132431	7928.71				54	0.017646	0.00472198	29942.8	0.0424647	0.889094	0.124395	7447.16
3	55	0.0167781	0.00458944	29506.6	0.0382895	0.910219	0.136225	9230.01				55	0.0135406	0.00420836	27979.5	0.0355391	0.902234	0.131669	7664.36					3	55	0.0167781	0.00458944	29506.6	0.0382895	0.910219	0.136225	9230.01				55	0.0151713	0.00483796	28252.6	0.0373119	0.903375	0.127228	5872.03
3	56	0.0129001	0.00510306	32989	0.0359865	0.903062	0.149728	6544.29				56	0.0130675	0.00493737	31089.2	0.0384552	0.898516	0.146994	5842.78					3	56	0.0129001	0.00510306	32989	0.0359865	0.903062	0.149728	6544.29				56	0.0145998	0.00432434	28862.8	0.03877	0.896406	0.122506	5167.11
3	57	0.0151904	0.00561667	30477.7	0.0452979	0.923344	0.14388	9592.66				57	0.0155246	0.00548413	28054.2	0.0413546	0.920844	0.137203	8351.34					3	57	0.0151904	0.00561667	30477.7	0.0452979	0.923344	0.14388	9592.66				57	0.0145886	0.00566638	26004.1	0.0417357	0.921781	0.136639	6411.92
3	58	0.0140801	0.00614686	29133.8	0.0386043	0.912594	0.149397	5335.82				58	0.0130559	0.00593147	28072.2	0.0411392	0.908641	0.145636	4563.75					3	58	0.0140801	0.00614686	29133.8	0.0386043	0.912594	0.149397	5335.82				58	0.014223	0.00618	28170.5	0.0413215	0.909156	0.145305	4800.5
3	59	0.0106565	0.00569952	30661.8	0.0359368	0.901422	0.140516	5825.23				59	0.0108225	0.00560011	28997.4	0.0374776	0.899391	0.132232	6896.08					3	59	0.0106565	0.00569952	30661.8	0.0359368	0.901422	0.140516	5825.23				59	0.0111439	0.00583206	28524.5	0.0391842	0.899516	0.137335	6052.58
3	60	0.0204227	0.00898005	23500.5	0.0502021	0.920453	0.156621	4172.1				60	0.0189324	0.00868182	23116.3	0.049937	0.919266	0.151567	3910.36					3	60	0.0204227	0.00898005	23500.5	0.0502021	0.920453	0.156621	4172.1				60	0.0203759	0.00838359	22916.2	0.0503844	0.917656	0.147541	3616.06
3	61	0.0155072	0.0051859	27710.1	0.0411724	0.929172	0.112201	19142				61	0.0121158	0.0049208	25639.9	0.0376599	0.924109	0.117751	17411.1					3	61	0.0155072	0.0051859	27710.1	0.0411724	0.929172	0.112201	19142				61	0.0118183	0.00545099	24386.9	0.0365332	0.928219	0.111886	14832.4
3	62	0.0145509	0.00525217	24632.2	0.0390019	0.909297	0.14098	5994.89				62	0.0136313	0.00533501	24700.5	0.0382066	0.907094	0.13591	9231.58					3	62	0.0145509	0.00525217	24632.2	0.0390019	0.909297	0.14098	5994.89				62	0.0146637	0.00535158	23206.3	0.0381072	0.906391	0.136407	4837.14
3	63	0.00815791	0.00357877	26422.4	0.0338823	0.913219	0.113344	12415				63	0.00628026	0.00357877	24394.1	0.0297071	0.909219	0.113079	11981.7					3	63	0.00815791	0.00357877	26422.4	0.0338823	0.913219	0.113344	12415				63	0.00985177	0.00404268	24362.6	0.033435	0.906734	0.113543	11621
3	64	0.0135085	0.00556697	26763.4	0.03988	0.912109	0.140201	6232.77				64	0.0123325	0.00596461	26689.6	0.0377262	0.914188	0.139721	6426.88					3	64	0.0135085	0.00556697	26763.4	0.03988	0.912109	0.140201	6232.77				64	0.0123367	0.00604745	26809.5	0.0391179	0.915375	0.140052	6158.64
3	65	0.0141037	0.00468885	30932.9	0.0403108	0.897062	0.15001	4629.1				65	0.0151188	0.00470541	30537.4	0.0420671	0.891172	0.146464	4173.27					3	65	0.0141037	0.00468885	30932.9	0.0403108	0.897062	0.15001	4629.1				65	0.0154691	0.00488767	29413.1	0.0413712	0.891141	0.140881	3918.38
3	66	0.0163812	0.00473855	34124.3	0.0417191	0.89675	0.152296	3209.82				66	0.0157947	0.00473855	33532.2	0.0405759	0.895234	0.149993	2976.14					3	66	0.0163812	0.00473855	34124.3	0.0417191	0.89675	0.152296	3209.82				66	0.0120791	0.00405925	31646.3	0.0363841	0.860688	0.12872	2390.53
3	67	0.00735381	0.0064948	29481.1	0.0386374	0.9075	0.142322	9250.03				67	0.00857295	0.00722381	27444.9	0.038654	0.905781	0.135016	6498.05					3	67	0.00735381	0.0064948	29481.1	0.0386374	0.9075	0.142322	9250.03				67	0.00947284	0.00679303	27477.1	0.0395984	0.906734	0.12915	7184.88
3	68	0.00841027	0.00463914	26557.9	0.0361356	0.910641	0.128206	6193.8				68	0.00973471	0.00505335	26081.3	0.036235	0.914828	0.138495	6182.24					3	68	0.00841027	0.00463914	26557.9	0.0361356	0.910641	0.128206	6193.8				68	0.0101216	0.00540129	25520.5	0.0365001	0.916937	0.128952	6429.87
3	69	0.0106971	0.00525217	27358.7	0.0393996	0.905609	0.139224	4487.07				69	0.0116964	0.00568295	26976.2	0.0377427	0.908422	0.13876	4062.19					3	69	0.0106971	0.00525217	27358.7	0.0393996	0.905609	0.139224	4487.07				69	0.0125832	0.00574922	27482.8	0.0390848	0.907922	0.133839	4798.49			14
3	70	0.00924326	0.00463914	24299.4	0.034661	0.895531	0.127875	6806.72				70	0.00857686	0.00513619	24260.3	0.0342468	0.899281	0.133226	7013.91					3	70	0.00924326	0.00463914	24299.4	0.034661	0.895531	0.127875	6806.72				70	0.01039	0.00564981	22977.2	0.0363676	0.898531	0.12973	5886.43
3	71	0.00546429	0.00417523	28769.4	0.0279674	0.897844	0.120369	6214.51				71	0.00812081	0.00470541	29389	0.034048	0.899734	0.129664	7313.1					3	71	0.00546429	0.00417523	28769.4	0.0279674	0.897844	0.120369	6214.51				71	0.0104635	0.00445689	28849.3	0.0359036	0.889641	0.120502	6207.61
3	72	0.0151377	0.0068593	19312.9	0.0436245	0.912219	0.15566	3897.46				72	0.0165567	0.00694214	19129	0.0445689	0.912047	0.15397	3780.52					3	72	0.0151377	0.0068593	19312.9	0.0436245	0.912219	0.15566	3897.46				72	0.0187575	0.00725694	18631.1	0.0460932	0.909469	0.145454	3130.87
3	73	0.0139466	0.00606402	14923.8	0.040725	0.905406	0.153672	2634.77				73	0.0132684	0.00593147	15060.5	0.0397475	0.906328	0.154831	2614.6					3	73	0.0139466	0.00606402	14923.8	0.040725	0.905406	0.153672	2634.77				73	0.0142345	0.00604745	14623.3	0.0407747	0.903937	0.149662	2418.78
3	74	0.00777072	0.00442375	20168.3	0.0324243	0.900984	0.136275	7979.17				74	0.00731087	0.00453973	19377.7	0.031016	0.902109	0.139771	7455.91					3	74	0.00777072	0.00442375	20168.3	0.0324243	0.900984	0.136275	7979.17				74	0.00884477	0.00415866	18894.4	0.0345947	0.88875	0.133309	6050.69
3	75	0.0101142	0.0064948	22236.7	0.03988	0.907375	0.153423	5804.53				75	0.0088203	0.00629598	22602	0.0373119	0.909266	0.153622	5890.18					3	75	0.0101142	0.0064948	22236.7	0.03988	0.907375	0.153423	5804.53				75	0.0104626	0.00672675	22422	0.0374445	0.905953	0.15392	5566.09
3	76	0.00911148	0.00482139	23883.5	0.0304858	0.914719	0.124793	9903.62				76	0.00698568	0.00457287	24032.3	0.0327556	0.914609	0.128653	9891.26					3	76	0.00911148	0.00482139	23883.5	0.0304858	0.914719	0.124793	9903.62				76	0.0118715	0.00531844	23760	0.0348598	0.915594	0.120551	8157.32
3	77	0.0122852	0.00407582	26754.6	0.0367155	0.918047	0.131569	7651.14				77	0.0115229	0.00386043	26325.4	0.0343959	0.91675	0.127063	7277.9					3	77	0.0122852	0.00407582	26754.6	0.0367155	0.918047	0.131569	7651.14				77	0.0135915	0.00445689	27240.1	0.0375605	0.914141	0.122059	6475.48
3	78	0.0112354	0.00584863	22586.9	0.0394658	0.912141	0.147276	5431.13				78	0.0120456	0.0059149	22603.7	0.0402777	0.914984	0.145387	4838.07					3	78	0.0112354	0.00584863	22586.9	0.0394658	0.912141	0.147276	5431.13				78	0.0124235	0.00618	22972.7	0.0390019	0.913344	0.145023	4593.45
3	79	0.0162307	0.00710783	25050.7	0.043028	0.926016	0.129531	7309.65				79	0.0144805	0.00752204	31392.2	0.0440718	0.904312	0.155014	2749.07					3	79	0.0162307	0.00710783	25050.7	0.043028	0.926016	0.129531	7309.65				79	0.0146775	0.00692557	24214.8	0.0427629	0.9245	0.125853	6410.39
3	80	0.0149193	0.00569952	16152	0.0420505	0.913813	0.148983	3734.43				80	0.0132661	0.00603088	16366.1	0.0398635	0.913109	0.151369	3894.77					3	80	0.0149193	0.00569952	16152	0.0420505	0.913813	0.148983	3734.43				80	0.0156404	0.00568295	15970.2	0.0424647	0.912906	0.147326	3539.83
3	81	0.0143042	0.00415866	21183.7	0.041686	0.901609	0.132249	4924.01				81	0.0153373	0.00437405	21216.9	0.0410895	0.899359	0.135513	6535.71					3	81	0.0143042	0.00415866	21183.7	0.041686	0.901609	0.132249	4924.01				81	0.0170378	0.00458944	21470.8	0.0451654	0.908078	0.140947	5148.67
3	82	0.0125814	0.00402611	23601.7	0.0365001	0.90325	0.13934	6447.55				82	0.0117615	0.00439062	22949.1	0.0354397	0.901094	0.132282	7688.72					3	82	0.0125814	0.00402611	23601.7	0.0365001	0.90325	0.13934	6447.55				82	0.010814	0.00412552	25562.9	0.0336669	0.898125	0.127957	6050.76
3	83	0.0143048	0.00465571	18531.5	0.0397972	0.903016	0.154682	5065.06				83	0.0151467	0.004606	18057.1	0.0397806	0.903328	0.153489	4514					3	83	0.0143048	0.00465571	18531.5	0.0397972	0.903016	0.154682	5065.06				83	0.0158531	0.00458944	17975.2	0.0396647	0.899234	0.151335	3981.03
3	84	0.00785244	0.00470541	31132.3	0.0349758	0.820312	0.1236	6812.31				84	0.00628236	0.00379415	23140.1	0.0319769	0.912484	0.128355	6812.31					3	84	0.00785244	0.00470541	31132.3	0.0349758	0.820312	0.1236	6812.31				84	0.0080658	0.0039267	21685.8	0.0355391	0.90325	0.12577	5563.87			15
			Difference Intra-observer											Mean intraobserver													Difference Intra-observer											Mean intraobserver
		Features>	1	2	3	4	5	6	7				Features>	1	2	3	4	5	6	7						Features>	1	2	3	4	5	6	7				Features>	1	2	3	4	5	6	7
		1	0.00125068	-0.000497051	-1080.67	-0.000497051	-0.0218125	-0.0335178	-659.047				1	0.00931072	0.00286633	20911.5	0.0321758	0.831594	0.106477	4439.4						1	0.00110946	-8.28418e-05	-6.91452	-0.00081185	0.0003125	-0.00203791	21.1153				1	0.00938133	0.00265922	20374.6	0.0323332	0.820531	0.0907366	4099.32
		2	-0.00213894	-0.000729008	-2017.54	0.00190536	-0.0470312	-0.0231129	3831.44				2	0.00193119	0.00265094	26181.9	0.0221933	0.860922	0.101854	12400.4						2	-6.44855e-05	1.65684e-05	73.3781	-0.000596461	0.001125	-9.94102e-05	15.3689				2	0.000893957	0.00227815	25136.4	0.0234442	0.836844	0.0903473	14308.4
		3	0.000675025	-0.000165684	-462.226	-6.62734e-05	-0.00453125	-0.00359533	-634.607				3	0.0071612	0.0039267	12067.6	0.0320266	0.886187	0.11201	10158.6						3	0.000249249	-1.65684e-05	26.4601	0.000662734	0.000734375	0.000994102	77.7818				3	0.00737409	0.00385214	11823.2	0.0316621	0.883555	0.109716	9802.42
		4	0.00255288	-0.00029823	-1580.36	0.0051859	-0.020375	-0.0195175	-2509.56				4	0.00708192	0.00371131	20178.3	0.0320515	0.87775	0.12196	5100.28						4	0.000610809	6.62734e-05	45.4398	0.000115979	0.000484375	-0.000248525	-2.26055				4	0.00805295	0.00352906	19365.4	0.0345865	0.86732	0.112325	3846.63
		5	0.000219767	-0.000662734	-2097.32	0.000994102	-0.0191563	-0.0421002	-3039.06				5	0.0113274	0.00281662	18632.2	0.0344622	0.895891	0.110304	6473.75						5	-0.00203634	-0.000115979	33.938	0.00140831	0.00229687	-0.000795281	-70.7316				5	0.0124555	0.00254324	17566.6	0.0342551	0.885164	0.0896514	4989.58
		6	0.00200215	-0.000182252	-1459	0.00205448	-0.0141406	-0.0218537	-902.317				6	0.0104602	0.00562496	15104.1	0.0377427	0.899398	0.140392	3129.13						6	0.00127893	-4.97051e-05	38.6238	0.000530188	0.00028125	0.000215389	9.04239				6	0.0108218	0.00555869	14355.3	0.0385049	0.892188	0.129357	2673.45
		7	0.00238563	-0.000579893	-1494.64	0.00139174	-0.00935937	-0.0240407	-2485.62				7	0.00929359	0.00436576	20090.7	0.0345947	0.88668	0.133947	4428.92						7	8.85272e-05	1.65684e-05	17.8735	-0.000563324	0.0003125	0.000795281	31.8279				7	0.0104421	0.00406753	19334.5	0.0355723	0.881844	0.121529	3170.19
		8	0.00241716	-0.00147458	-3374.99	0.0019385	-0.0149844	-0.0400789	-1483.7				8	0.00528655	0.00398469	22922.7	0.0290029	0.888477	0.120543	3986.89						8	0.000566301	0.000115979	-36.1116	-0.000994102	-0.000765625	-0.00091126	0.194612				8	0.00621199	0.00318941	21253.2	0.0304692	0.881367	0.100959	3244.94
		9	-0.000332531	-0.000695871	-3498.12	0.000497051	-0.0261094	-0.00593147	-3529.37				9	0.00238575	0.00250182	22958.3	0.0221022	0.872695	0.104215	9914.07						9	0.000632633	4.97051e-05	-74.5723	-0.000430777	0.00139063	0.00102724	-53.9587				9	0.00190316	0.00212903	21246.6	0.0225661	0.858945	0.100736	8176.36
		10	0.00264767	-0.000613029	-224.331	0.0016734	-0.021	-0.0127576	-1224.04				10	0.00479458	0.00449831	17858.3	0.0303615	0.880578	0.128239	5170.56						10	0.000170166	0.000132547	39.7647	0.000497051	-0.000828125	-0.00144145	1.00671				10	0.00603333	0.00412552	17726.2	0.0309497	0.870492	0.122581	4558.03
		11	0.00299461	-0.000430777	-3756.58	0.00536815	-0.0613438	-0.0194513	-1104.77				11	0.00527638	0.00308172	23405	0.0280171	0.842594	0.120005	3570.32						11	0.000581238	-1.65684e-05	-10.3595	0.00197163	-0.00084375	0.000430777	18.1552				11	0.00648306	0.00287461	21531.9	0.0297154	0.812344	0.110064	3008.86
		12	0.00119959	-0.000513619	-1597.92	0.000762145	-0.0165937	-0.0212241	-1124.31				12	0.00721557	0.00292432	22910.9	0.0270893	0.830828	0.110006	3310.44						12	6.27736e-05	-9.94102e-05	-53.112	0.00029823	0.000890625	-0.000347936	-3.89685				12	0.00778398	0.00271721	22138.5	0.0273212	0.822086	0.0995676	2750.23
		13	-0.000721	-0.000596461	-2812.64	3.31367e-05	-0.0191875	-0.0295745	-2142.17				13	0.00883631	0.00397641	22521.2	0.0313142	0.891422	0.113386	6510.74						13	0.000730304	-1.65684e-05	-18.6053	-0.00029823	0.00201562	-0.00235271	1.63339				13	0.00811066	0.00368646	21124.1	0.0314799	0.88082	0.0997747	5438.84
		14	0.00239098	-0.000463914	-214.722	-0.000745576	-0.00390625	-0.0116476	111.51				14	0.0125198	0.00679303	18555.2	0.0415949	0.910219	0.147052	5420.44						14	0.000423345	-8.28418e-05	-31.8706	-0.00231957	-0.0011875	0.00376102	-10.4337				14	0.0135036	0.00660249	18463.8	0.0423819	0.908859	0.139348	5481.41
		15	0.001396	-0.000265094	50.5263	0.00294917	-0.011	-0.0113659	-1638.88				15	0.00444644	0.00561667	32555.9	0.0329213	0.890734	0.120303	4365.89						15	-4.7168e-05	-3.31367e-05	14.2922	-0.00111008	-7.8125e-05	-0.000778713	2.88368				15	0.00516803	0.0055007	32574	0.034951	0.885273	0.115009	3545.01
		16	0.00186534	-0.00255153	-1145.68	-0.00457287	-0.0106094	-0.0245874	-2940.84				16	0.00317779	0.00755517	20815.8	0.037196	0.922148	0.151219	7061.39						16	0.00150022	-0.000795281	-976.377	-0.000894691	-0.00470313	-0.00637882	-1642.18				16	0.00336035	0.00667705	20731.2	0.0353569	0.919195	0.142115	6412.06
		17	0.000815101	-0.000563324	-1267.35	-0.000977533	-0.00820313	-0.0239247	-329.324				17	0.00740295	0.00642852	17357.2	0.0368895	0.903227	0.139125	4094.55						17	-0.00126693	0.000132547	53.0014	-0.00122606	0.00121875	0.00155743	-6.5231				17	0.00844397	0.00608059	16697.1	0.0370137	0.898516	0.126383	3933.15
		18	0.00181696	-0.000662734	-1352.45	-0.0019385	-0.0627187	-0.0181258	-1630.48				18	0.00342867	0.00323083	14776.9	0.0219448	0.850562	0.110544	3725.32						18	-0.000132413	1.65684e-05	12.8543	0	0.000109375	0.000364504	-6.11419				18	0.00440335	0.00289118	14094.2	0.0209755	0.819148	0.101299	2913.13
		19	0.00218357	-0.00132547	153.87	0.000844986	-0.0100781	-0.0213566	770.506				19	0.00624457	0.00495394	22151.8	0.0303118	0.881805	0.135819	4618.78						19	-0.000173476	0.000165684	18.3551	0.00081185	0.0005	0	-9.55667				19	0.0074231	0.00420836	22219.6	0.0303284	0.876516	0.125141	5008.81
		20	0.00348256	-0.00150772	-981.825	-9.94102e-05	-0.0183281	-0.0111671	-2137.92				20	0.00742442	0.00703327	22309.1	0.0345947	0.892711	0.147127	4472.79						20	-0.00021032	4.97051e-05	-24.5967	0	-0.000171875	-0.000281662	-7.74043				20	0.00927086	0.00625456	21830.5	0.034545	0.883633	0.141684	3407.7
		21	0.00286257	-0.00109351	-831.074	-0.00127576	-0.00142188	-0.00967592	-814.661				21	0.00540023	0.00724037	18531.5	0.0371877	0.912461	0.152512	3870.75						21	4.84922e-05	-3.31367e-05	2.56261	-0.00029823	0.00153125	-0.000331367	6.67622				21	0.00680727	0.00671019	18114.6	0.0366989	0.910984	0.147839	3460.08
		22	0.00325808	-0.000579893	-521.025	0.0013089	-0.0118125	-0.014431	-924.608				22	0.00571226	0.00506163	14156.6	0.0338574	0.893188	0.133168	5500.72						22	0.000928401	9.94102e-05	9.94249	-0.000248525	0.00053125	-0.00334681	6.14776				22	0.0068771	0.00472198	13891.1	0.0346362	0.887016	0.127626	5035.34
		23	0.00172842	-0.000281662	-841.387	0.00250182	-0.0186875	-0.00840016	-633.7				23	0.00459621	0.00574094	17865.3	0.0341888	0.871094	0.148544	2015.69						23	-0.00055681	0.000149115	15.9017	-0.000579893	0.00139062	0.00160713	3.18212				23	0.00573883	0.00552555	17436.6	0.0357297	0.861055	0.14354	1697.25
		24	0.00238609	-0.000414209	-577.596	0.00289946	0.00028125	-0.00632911	-963.963				24	0.00502575	0.00691729	24930.6	0.0357794	0.893906	0.149712	3828.53						24	-3.84394e-05	-4.97051e-05	-7.0007	0.000314799	0.00117188	-0.000331367	-22.968				24	0.00623801	0.00673504	24645.3	0.0370717	0.893461	0.146713	3358.03
		25	0.00308286	-0.000132547	-2221.73	1.65684e-05	-0.00539062	-0.0149115	-326.866				25	0.00566961	0.00516933	23883	0.0308751	0.915148	0.116061	7972.32						25	-0.000327778	6.62734e-05	-39.2889	0.000149115	-0.000515625	-0.000745576	-2.86374				25	0.00737493	0.00506992	22791.7	0.0308089	0.912711	0.108978	7810.31
		26	0.0037481	-0.000596461	-158.574	-0.000397641	-0.0115781	-0.0167837	221.079				26	0.00531792	0.00737292	21464.8	0.0360528	0.895789	0.158534	2967.64						26	-3.86948e-05	0	15.1994	-0.000265094	0.000953125	-0.000613029	15.3108				26	0.00721131	0.00707469	21377.9	0.0359865	0.889523	0.150449	3070.53
		27	0.00161442	-0.00117635	-1111.73	-0.000132547	-0.00507813	-0.015276	-505.407				27	0.00797541	0.00522732	27848.9	0.0354729	0.883555	0.138909	3027.05						27	-0.000699866	-1.65684e-05	43.4963	-0.00029823	-0.00101563	-0.00117635	4.19423				27	0.00913256	0.00464743	27271.3	0.0355557	0.881523	0.131859	2772.25
		28	0.00119847	-0.000729008	-3014.78	0.00178938	-0.0225781	-0.0261614	-2539.49				28	0.00881081	0.00395984	19414.3	0.0357545	0.885055	0.127038	4203.79						28	-0.000501952	-0.00019882	-8.21245	0.00101067	0.00128125	-0.000248525	-1.48175				28	0.00966102	0.00369474	17911.1	0.0361439	0.873125	0.114081	2934.79
		29	0.00477776	-0.000414209	-1344.03	0.00203791	-0.0188594	-0.0213069	-1564.96				29	0.00661846	0.00592319	20653.8	0.0345699	0.884648	0.140218	2880.19						29	-0.000204104	0.000115979	-5.37191	-0.000231957	0.00015625	-4.97051e-05	-5.94307				29	0.00910939	0.0056581	19984.4	0.0357048	0.875141	0.129589	2100.69
		30	-0.000571387	-0.00122606	-1334.65	-0.00165684	-0.017125	-0.0149778	-2290.63				30	0.00595827	0.00553383	19054.3	0.0338823	0.896156	0.126715	4752.23						30	0.000209036	-0.00019882	-31.2615	0.000662734	0.00179687	-0.00202134	-32.3312				30	0.00556806	0.00502021	18402.6	0.0327225	0.886695	0.120237	3623.08
		31	-0.00359583	-0.000480482	-559.948	-0.00334681	-0.023625	-0.00705812	-496.59				31	0.00340402	0.00632083	17617.9	0.0308503	0.874594	0.144294	2610.84						31	-7.7194e-05	0.000132547	13.9395	-0.000530188	0.00117188	0.000347936	0.531088				31	0.0016447	0.00601432	17330.9	0.029442	0.862195	0.140591	2362.28
		32	0.00144476	-0.00081185	1018.95	0.00376102	-0.00834375	-0.0136689	-139.533				32	0.00255129	0.00453145	31295.7	0.0287378	0.892	0.112723	11369.8						32	0.000453101	0	93.8206	-0.000894691	-0.0003125	0.00115979	-30.633				32	0.00304712	0.00412552	31758.3	0.0310657	0.887984	0.105309	11315.4
		33	-0.0040634	-0.00145802	320.849	-0.00425807	-0.00975	-0.00515276	-445.674				33	0.00445119	0.00757174	17776	0.0340563	0.902562	0.139481	7566.7						33	0.000270389	0.000165684	19.9914	0.00071244	0.0014375	-0.000314799	-19.2812				33	0.0022843	0.00675989	17926.4	0.031571	0.896969	0.137062	7353.5
		34	0.00190526	-0.00175625	-1108.15	-0.000248525	-0.015	-0.0236431	-1177.22				34	0.00602171	0.00637882	21239.1	0.0339237	0.9015	0.129788	4614.33						34	-0.000750164	0	11.1587	-0.000894691	0.0008125	0.00149115	6.49373				34	0.00734942	0.0055007	20679.5	0.0342468	0.893594	0.117221	4022.48
		35	0.00477015	-0.00081185	-544.196	-0.00115979	-0.0149063	-0.0134204	-983.843				35	0.0032506	0.00872324	19325.6	0.0413712	0.907891	0.145901	3830.12						35	0.000392741	0.000132547	-22.799	-0.000381072	-0.00267187	0.00152429	-4.83197				35	0.00543931	0.00825104	19064.9	0.0409818	0.901773	0.138429	3340.61
		36	-0.00282529	-0.00145802	-360.22	-1.65684e-05	-0.0140469	-0.00281662	-255.579				36	0.00261016	0.00810193	32613.9	0.0350338	0.884148	0.149298	3199.7						36	0.000553051	-0.00019882	11.4098	-0.00029823	-4.6875e-05	-0.000447346	-0.070718				36	0.00092099	0.00747233	32428.1	0.0351746	0.877148	0.148113	3071.94
		37	-0.00281819	-0.000579893	-558.356	-0.00104381	-0.0126406	-0.00243555	-52.87				37	0.00581967	0.0070167	24342.1	0.0336752	0.87918	0.137062	2145.7						37	-0.000612807	0.000115979	26.7152	-0.00019882	0.00148437	-0.00071244	-0.372268				37	0.00471698	0.00666877	24049.5	0.0332527	0.872117	0.1362	2119.45
		38	0.00358236	-0.000596461	-856.574	0.00137517	-0.0134219	-0.0123766	-859.7				38	0.00417622	0.00533501	22275.9	0.0308089	0.87943	0.134908	2878.06						38	0.000825193	0	24.2046	-0.000613029	-0.00225	0.002303	58.7259				38	0.0055548	0.00503678	21835.5	0.031803	0.873844	0.127568	2418.84
		39	0.0030405	-0.00142488	430.526	0.00183909	-0.00425	-0.0249685	-1167.89				39	0.00775533	0.00563324	24293.6	0.0357959	0.891797	0.141568	3520.37						39	-0.00063182	-9.94102e-05	-19.8206	-0.00159056	0.000515625	0.000397641	-4.98124				39	0.00959148	0.00497051	24518.8	0.0375108	0.889414	0.128885	2938.92
		40	-0.000258795	-0.00190536	-1095.07	-0.00407582	-0.0179531	-0.0236762	-945.051				40	0.00596816	0.00666877	36534.8	0.0338657	0.911727	0.132075	6121.68						40	0.000332385	-6.62734e-05	88.6005	-0.00104381	0.000984375	-0.000646166	7.99869				40	0.00567257	0.00574922	35942.9	0.0323497	0.902258	0.12056	5645.16
		41	0.00357607	-0.000844986	-958.533	0.00241898	-0.00873437	-0.0144145	-986.534				41	0.00477375	0.00724866	19526	0.0344953	0.900039	0.156372	3124.91						41	-0.000387653	3.31367e-05	12.3272	-0.000265094	0.000265625	-0.000629598	20.6622				41	0.00675561	0.0068096	19040.6	0.0358374	0.895539	0.14948	2621.31
		42	0.00269182	-0.000182252	-1075.08	0.00415866	-0.0141094	-0.00904633	-1000.67				42	0.00743002	0.00574094	14392.3	0.0338077	0.871383	0.154202	1723.34						42	-0.000436137	-6.62734e-05	15.7542	0.00071244	-0.00175	-0.00152429	0.276768				42	0.008994	0.00568295	13846.9	0.0355309	0.865203	0.150441	1222.86
		43	0.00280057	-0.000944397	-903.78	0.000861555	-0.00804688	-0.0116641	-916.07				43	0.00747771	0.00804394	19388.2	0.0402114	0.910336	0.164043	3477.67						43	-0.000240443	-3.31367e-05	43.2719	-0.000215389	0.000796875	0.00081185	-0.830461				43	0.00899822	0.00758831	18914.7	0.0407499	0.905914	0.157805	3020.05
		44	0.00290292	-0.00102724	-609.456	0.00309828	-0.00239063	-0.0131387	-833.556				44	0.00757246	0.00684273	18876	0.0368563	0.908086	0.151907	3436.5						44	0.000217869	8.28418e-05	40.5974	0.000927828	-0.0001875	-0.000778713	0.671319				44	0.00891498	0.00628769	18551	0.0379415	0.906984	0.145727	3019.39
		45	-0.00319506	-0.00115979	-89.6919	-0.00178938	-0.0220625	-0.00233614	-662.833				45	0.00635268	0.00902976	20729.5	0.0355557	0.887109	0.157739	1907.31						45	0.000541114	-0.00019882	29.9246	0.000347936	0.000828125	-0.00192193	1.0689				45	0.00448459	0.00854927	20669.7	0.034487	0.875664	0.157532	1575.36
		46	0.00241285	-0.000662734	-429.125	0.00127576	-0.00196875	-0.0146133	-935.823				46	0.00778682	0.00694214	21902.5	0.0368398	0.911203	0.149778	4137.99						46	0.000144362	0.00019882	-6.30513	0.00124263	-0.000125	-0.000629598	-3.12668				46	0.00892107	0.00651137	21691.1	0.0368563	0.910281	0.142786	3671.64
		47	0.00226699	-0.000662734	686.249	-0.00185566	6.25e-05	-0.00395984	953.858				47	0.00462317	0.0084333	25631.7	0.0395487	0.91225	0.16044	5025.77						47	0.000106635	-0.000115979	100.46	-0.000497051	0.00185937	-0.000795281	201.042				47	0.00570335	0.00815992	25924.6	0.0388694	0.911352	0.158857	5402.18
		48	0.0022603	-0.00114322	-620.021	0.00268407	-0.0139844	-0.0108854	-960.372				48	0.00469204	0.00593976	18737.9	0.0323083	0.899633	0.14856	4151.17						48	-0.00018374	-3.31367e-05	-30.3205	9.94102e-05	0.0001875	-0.000497051	3.84946				48	0.00591406	0.00538472	18443	0.0336006	0.892547	0.143366	3669.06
		49	0.00359306	-0.000927828	-822.297	0.00157399	-0.00215625	-0.0204454	-1119.32				49	0.00829306	0.00596461	19466.6	0.0363096	0.916656	0.140351	6217.89						49	-0.000313245	0.000149115	38.1054	-0.000745576	0.000578125	0.000844986	12.1133				49	0.0102462	0.00542614	19036.4	0.0374693	0.915289	0.129705	5652.18
		50	-0.00241629	0	1745.1	-0.00241898	-0.000609375	0.00202134	1865.55				50	0.0181354	0.00442375	32125.3	0.0437902	0.907055	0.13881	6994.46						50	-0.00320618	-0.000215389	4708.21	-0.002303	0.00246875	0.00596461	3056.18				50	0.0185303	0.00453145	30643.7	0.0437322	0.905516	0.136838	6399.14
		51	0.00216688	0.0012592	8548.77	0.00576579	0.00640625	-0.0035622	3331.26				51	0.0136668	0.00581549	32491.7	0.040841	0.926141	0.115042	15137.9						51	0.00985603	0.0019385	10953.3	0.0112002	0.0182813	0.00790311	7441.57				51	0.00982219	0.00547584	31289.4	0.0381238	0.920203	0.10931	13082.8
		52	0.00849304	0.00182252	4395.91	0.0103055	0.0165781	0.0150772	2494.22				52	0.0145988	0.00502021	23968.3	0.0415866	0.924242	0.113825	15641						52	0.00519641	8.28418e-05	4896.16	0.00810193	0.00892188	0.0156902	1740.88				52	0.0162471	0.00589005	23718.2	0.0426884	0.92807	0.113518	16017.6
		53	0.0037496	0.000430777	3717.7	0.0013089	0.00779688	0.00560011	3990.27				53	0.0102053	0.00502021	25360.1	0.0379995	0.916773	0.139191	7842.05						53	0.00205944	8.28418e-05	2447.97	-0.000397641	0.0129844	0.016966	2387.01				53	0.0110503	0.00519418	25994.9	0.0388528	0.91418	0.133508	8643.67
		54	-0.00130978	3.31367e-05	894.039	-0.00410895	0.0220938	0.00661078	-3879.18				54	0.0176923	0.00467228	31647.9	0.0442375	0.884156	0.129126	9868.3						54	-0.000608614	-3.31367e-05	2152.09	-0.000281662	0.00610937	0.00803566	481.555				54	0.0173417	0.00470541	31018.9	0.0423239	0.892148	0.128413	7687.94
		55	0.00323742	0.000381072	1527.07	0.00275035	0.00798437	0.0045563	1565.65				55	0.0151594	0.0043989	28743	0.0369143	0.906227	0.133947	8447.18						55	0.00160677	-0.000248525	1253.98	0.000977533	0.00684375	0.00899662	3357.98				55	0.0159747	0.0047137	28879.6	0.0378007	0.906797	0.131727	7551.02
		56	-0.000167407	0.000165684	1899.81	-0.00246869	0.00454687	0.00273378	701.509				56	0.0129838	0.00502021	32039.1	0.0372208	0.900789	0.148361	6193.53						56	-0.00169969	0.000778713	4126.18	-0.00278348	0.00665625	0.0272218	1377.18				56	0.0137499	0.0047137	30925.9	0.0373782	0.899734	0.136117	5855.7
		57	-0.00033423	0.000132547	2423.51	0.00394327	0.0025	0.00667705	1241.32				57	0.0153575	0.0055504	29265.9	0.0433263	0.922094	0.140541	8972						57	0.000601786	-4.97051e-05	4473.6	0.0035622	0.0015625	0.00724037	3180.74				57	0.0148895	0.00564153	28240.9	0.0435168	0.922562	0.140259	8002.29
		58	0.00102423	0.000215389	1061.57	-0.00253496	0.00395313	0.00376102	772.078				58	0.013568	0.00603917	28603	0.0398718	0.910617	0.147516	4949.78						58	-0.000142924	-3.31367e-05	963.315	-0.00271721	0.0034375	0.00409239	535.327				58	0.0141516	0.00616343	28652.1	0.0399629	0.910875	0.147351	5068.16
		59	-0.000166043	9.94102e-05	1664.46	-0.00154086	0.00203125	0.00828418	-1070.84				59	0.0107395	0.00564981	29829.6	0.0367072	0.900406	0.136374	6360.65						59	-0.000487423	-0.000132547	2137.3	-0.0032474	0.00190625	0.00318113	-227.347				59	0.0109002	0.00576579	29593.2	0.0375605	0.900469	0.138926	5938.91
		60	0.00149032	0.00029823	384.228	0.000265094	0.0011875	0.00505335	261.735				60	0.0196776	0.00883094	23308.4	0.0500696	0.919859	0.154094	4041.23						60	4.68568e-05	0.000596461	584.326	-0.000182252	0.00279688	0.00907946	556.036				60	0.0203993	0.00868182	23208.4	0.0502933	0.919055	0.152081	3894.08
		61	0.00339141	0.000265094	2070.19	0.00351249	0.0050625	-0.0055504	1730.86				61	0.0138115	0.00505335	26675	0.0394161	0.926641	0.114976	18276.5						61	0.00368884	-0.000265094	3323.18	0.00463914	0.000953125	0.000314799	4309.52				61	0.0136628	0.00531844	26048.5	0.0388528	0.928695	0.112044	16987.2
		62	0.00091952	-8.28418e-05	-68.3665	0.000795281	0.00220312	0.00506992	-3236.69				62	0.0140911	0.00529359	24666.4	0.0386043	0.908195	0.138445	7613.24						62	-0.000112832	-9.94102e-05	1425.87	0.000894691	0.00290625	0.00457287	1157.76				62	0.0146073	0.00530188	23919.2	0.0385546	0.907844	0.138694	5416.01
		63	0.00187765	0	2028.33	0.00417523	0.004	0.000265094	433.236				63	0.00721909	0.00357877	25408.2	0.0317947	0.911219	0.113212	12198.4						63	-0.00169386	-0.000463914	2059.81	0.000447346	0.00648437	-0.00019882	794.012				63	0.00900484	0.00381072	25392.5	0.0336586	0.909977	0.113444	12018
		64	0.00117602	-0.000397641	73.8207	0.00215389	-0.00207813	0.000480482	-194.11				64	0.0129205	0.00576579	26726.5	0.0388031	0.913148	0.139961	6329.82						64	0.00117183	-0.000480482	-46.073	0.000762145	-0.00326563	0.000149115	74.1281				64	0.0129226	0.00580721	26786.5	0.039499	0.913742	0.140127	6195.7
		65	-0.00101505	-1.65684e-05	395.543	-0.00175625	0.00589063	0.00354563	455.833				65	0.0146112	0.00469713	30735.1	0.0411889	0.894117	0.148237	4401.18						65	-0.00136541	-0.00019882	1519.84	-0.00106038	0.00592187	0.00912917	710.72				65	0.0147864	0.00478826	30173	0.040841	0.894102	0.145445	4273.74
		66	0.000586509	0	592.127	0.00114322	0.00151563	0.002303	233.677				66	0.016088	0.00473855	33828.2	0.0411475	0.895992	0.151145	3092.98						66	0.00430218	0.000679303	2478.05	0.00533501	0.0360625	0.0235768	819.287				66	0.0142302	0.0043989	32885.3	0.0390516	0.878719	0.140508	2800.17
		67	-0.00121914	-0.000729008	2036.22	-1.65684e-05	0.00171875	0.00730665	2751.98				67	0.00796338	0.0068593	28463	0.0386457	0.906641	0.138669	7874.04						67	-0.00211903	-0.00029823	2004.01	-0.000960965	0.000765625	0.0131718	2065.15				67	0.00841333	0.00664391	28479.1	0.0391179	0.907117	0.135736	8217.45
		68	-0.00132445	-0.000414209	476.635	-9.94102e-05	-0.0041875	-0.010289	11.5644				68	0.00907249	0.00484625	26319.6	0.0361853	0.912734	0.13335	6188.02						68	-0.00171137	-0.000762145	1037.36	-0.000364504	-0.00629687	-0.000745576	-236.07				68	0.00926595	0.00502021	26039.2	0.0363178	0.913789	0.128579	6311.84
		69	-0.000999327	-0.000430777	382.489	0.00165684	-0.0028125	0.000463914	424.877				69	0.0111967	0.00546756	27167.4	0.0385711	0.907016	0.138992	4274.63						69	-0.00188619	-0.000497051	-124.162	0.000314799	-0.0023125	0.00538472	-311.428				69	0.0116401	0.0055007	27420.7	0.0392422	0.906766	0.136532	4642.78
		70	0.0006664	-0.000497051	39.0928	0.000414209	-0.00375	-0.00535158	-207.19				70	0.00891006	0.00488767	24279.8	0.0344539	0.897406	0.13055	6910.32						70	-0.0011467	-0.00101067	1322.21	-0.00170654	-0.003	-0.00185566	920.296				70	0.00981661	0.00514448	23638.3	0.0355143	0.897031	0.128802	6346.58
		71	-0.00265652	-0.000530188	-619.549	-0.00608059	-0.00189062	-0.00929485	-1098.59				71	0.00679255	0.00444032	29079.2	0.0310077	0.898789	0.125017	6763.8						71	-0.00499921	-0.000281662	-79.8952	-0.00793624	0.00820313	-0.000132547	6.89707				71	0.0079639	0.00431606	28809.4	0.0319355	0.893742	0.120435	6211.06
		72	-0.00141902	-8.28418e-05	183.986	-0.000944397	0.000171875	0.00168997	116.938				72	0.0158472	0.00690072	19221	0.0440967	0.912133	0.154815	3838.99						72	-0.00361978	-0.000397641	681.868	-0.00246869	0.00275	0.0102061	766.585				72	0.0169476	0.00705812	18972	0.0448588	0.910844	0.150557	3514.17
		73	0.000678243	0.000132547	-136.695	0.000977533	-0.000921875	-0.00115979	20.1693				73	0.0136075	0.00599775	14992.1	0.0402363	0.905867	0.154251	2624.69						73	-0.000287855	1.65684e-05	300.502	-4.97051e-05	0.00146875	0.00400954	215.993				73	0.0140905	0.00605574	14773.5	0.0407499	0.904672	0.151667	2526.78
		74	0.000459848	-0.000115979	790.626	0.00140831	-0.001125	-0.00349592	523.257				74	0.0075408	0.00448174	19773	0.0317201	0.901547	0.138023	7717.54						74	-0.00107405	0.000265094	1273.87	-0.00217046	0.0122344	0.00296574	1928.48				74	0.00830775	0.00429121	19531.4	0.0335095	0.894867	0.134792	7014.93
		75	0.00129385	0.00019882	-365.206	0.0025681	-0.00189062	-0.00019882	-85.6558				75	0.00946723	0.00639539	22419.4	0.038596	0.90832	0.153522	5847.36						75	-0.000348409	-0.000231957	-185.25	0.00243555	0.00142188	-0.000497051	238.433				75	0.0102884	0.00661078	22329.4	0.0386623	0.906664	0.153672	5685.31
		76	0.0021258	0.000248525	-148.883	-0.00226987	0.000109375	-0.00386043	12.357				76	0.00804858	0.00469713	23957.9	0.0316207	0.914664	0.126723	9897.44						76	-0.00276003	-0.000497051	123.463	-0.00437405	-0.000875	0.0042415	1746.3				76	0.0104915	0.00506992	23821.7	0.0326728	0.915156	0.122672	9030.47
		77	0.000762268	0.000215389	429.23	0.00231957	0.00129688	0.00450659	373.234				77	0.0119041	0.00396812	26540	0.0355557	0.917398	0.129316	7464.52						77	-0.00130633	-0.000381072	-485.508	-0.000844986	0.00390625	0.00951024	1175.66				77	0.0129384	0.00426635	26997.4	0.037138	0.916094	0.126814	7063.31
		78	-0.000810232	-6.62734e-05	-16.7773	-0.00081185	-0.00284375	0.00188879	593.067				78	0.0116405	0.00588177	22595.3	0.0398718	0.913563	0.146332	5134.6						78	-0.00118813	-0.000331367	-385.765	0.000463914	-0.00120312	0.0022533	837.689				78	0.0118294	0.00601432	22779.8	0.0392339	0.912742	0.14615	5012.29
		79	0.00175015	-0.000414209	-6341.47	-0.00104381	0.0217031	-0.0254821	4560.58				79	0.0153556	0.00731493	28221.4	0.0435499	0.915164	0.142273	5029.36						79	0.00155312	0.000182252	835.876	0.000265094	0.00151563	0.00367818	899.264				79	0.0154541	0.0070167	24632.8	0.0428955	0.925258	0.127692	6860.02
		80	0.00165315	-0.000331367	-214.03	0.00218702	0.000703125	-0.00238584	-160.34				80	0.0140927	0.0058652	16259.1	0.040957	0.913461	0.150176	3814.6						80	-0.000721102	1.65684e-05	181.878	-0.000414209	0.00090625	0.00165684	194.601				80	0.0152798	0.00569123	16061.1	0.0422576	0.913359	0.148154	3637.13
		81	-0.00103316	-0.000215389	-33.2597	0.000596461	0.00225	-0.00326397	-1611.7				81	0.0148208	0.00426635	21200.3	0.0413878	0.900484	0.133881	5729.86						81	-0.00273358	-0.000430777	-287.158	-0.00347936	-0.00646875	-0.00869839	-224.668				81	0.015671	0.00437405	21327.3	0.0434257	0.904844	0.136598	5036.34
		82	0.000819872	-0.000364504	652.592	0.00106038	0.00215625	0.00705812	-1241.17				82	0.0121714	0.00420836	23275.4	0.0359699	0.902172	0.135811	7068.14						82	0.00176734	-9.94102e-05	-1961.16	0.00283319	0.005125	0.0113825	396.787				82	0.0116977	0.00407582	24582.3	0.0350835	0.900687	0.133649	6249.16
		83	-0.000841928	4.97051e-05	474.458	1.65684e-05	-0.0003125	0.00119292	551.061				83	0.0147257	0.00463086	18294.3	0.0397889	0.903172	0.154086	4789.53						83	-0.00154836	6.62734e-05	556.268	0.000132547	0.00378125	0.00334681	1084.03				83	0.0150789	0.00462257	18253.4	0.0397309	0.901125	0.153009	4523.04
		84	0.00157008	0.00091126	7992.2	0.00299887	-0.0921719	-0.00475512	0				84	0.0070674	0.00424978	27136.2	0.0334764	0.866398	0.125978	6812.31						84	-0.000213356	0.000778713	9446.47	-0.000563324	-0.0829375	-0.00217046	1248.45				84	0.00795912	0.00431606	26409.1	0.0352575	0.861781	0.124685	6188.09
								Bias	0.00116499	-0.00045346	-135.345	0.000658001	-0.00869978	-0.00927868	-379.765																	Bias	-2.42274e-05	-2.82057e-05	754.053	-3.3334e-05	0.00088058	0.00233121	515.355
								STD	0.00213412	0.000663033	2042.24	0.0025512	0.0166058	0.0117125	1578.14																	STD	0.00183955	0.000357678	1913.49	0.00231588	0.010655	0.0056909	1194.3
								lower LOA	-0.00301788	-0.001753	-4138.13	-0.00434235	-0.0412471	-0.0322352	-3472.93																	lower LOA	-0.00362975	-0.000729255	-2996.39	-0.00457247	-0.0200033	-0.00882296	-1825.47
								Upper LOA	0.00534786	0.000846084	3867.44	0.00565835	0.0238476	0.0136778	2713.4																	Upper LOA	0.0035813	0.000672844	4504.5	0.0045058	0.0217645	0.0134854	2856.18
			0	0.002	10000	0.02	0	0	0					-0.00301788	-0.001753	-4138.13	-0.00434235	-0.0412471	-0.0322352	-3472.93							0	0.002	10000	0.02	0	0	0					-0.00362975	-0.000729255	-2996.39	-0.00457247	-0.0200033	-0.00882296	-1825.47
			0.025	0.01	40000	0.055	1.0193	0.180448	20104.2					-0.00301788	-0.001753	-4138.13	-0.00434235	-0.0412471	-0.0322352	-3472.93							0.025	0.01	40000	0.055	0.96	0.18	20000					-0.00362975	-0.000729255	-2996.39	-0.00457247	-0.0200033	-0.00882296	-1825.47
			0	0.002	10000	0.02	0	0	0					0.00116499	-0.00045346	-135.345	0.000658001	-0.00869978	-0.00927868	-379.765							0	0.002	10000	0.02	0	0	0					-2.42274e-05	-2.82057e-05	754.053	-3.3334e-05	0.00088058	0.00233121	515.355
			0.025	0.01	40000	0.055	1.0193	0.180448	20104.2					0.00116499	-0.00045346	-135.345	0.000658001	-0.00869978	-0.00927868	-379.765							0.025	0.01	40000	0.055	0.96	0.18	20000					-2.42274e-05	-2.82057e-05	754.053	-3.3334e-05	0.00088058	0.00233121	515.355
			0	0.002	10000	0.02	0	0	0					0.00534786	0.000846084	3867.44	0.00565835	0.0238476	0.0136778	2713.4							0	0.002	10000	0.02	0	0	0					0.0035813	0.000672844	4504.5	0.0045058	0.0217645	0.0134854	2856.18
			0.025	0.01	40000	0.055	1.0193	0.180448	20104.2					0.00534786	0.000846084	3867.44	0.00565835	0.0238476	0.0136778	2713.4							0.025	0.01	40000	0.055	0.96	0.18	20000					0.0035813	0.000672844	4504.5	0.0045058	0.0217645	0.0134854	2856.18
	1
	2
	3
	4
	5
	6
	7
