# Supplementary material for: Characterization of interstitial diffuse fibrosis patterns using texture analysis of myocardial native T1 mapping
Source: PLoS One. 2020 Jun 1;15(6):e0233694. doi: 10.1371/journal.pone.0233694 (PMC7263579; doi:10.1371/journal.pone.0233694)
Supplement: S4 Data — (XLSX) [file pone.0233694.s008.xlsx]

## Sheet: sheet1
				Validation Dataset													Testing Dataset
	0.25					HCM-DCM
						Tx			T1									HCM-DCM
	1.1	1.45				x	y											x	y
						0.795833	1.39233		0.790625	1108.14								0.9	29.2762
						0.9	6.78103		0.80625	1119.44								0.80625	439.875
						0.786364	1.62236		0.821875	1107.38								0.8	269.337
						0.80625	3.72253		0.80625	1132.31								0.86875	446.671
						0.809091	1.69642		0.792857	1093.34								0.8375	637.911
						0.831818	1.56581		0.7875	1071.84								0.8	137.536
						0.80625	6.18235		0.790625	1124.98								0.8	172.744
						0.9	-0.930838		0.8375	1170.87								0.85	238.944
						0.80625	2.07702		0.853125	1107.95								0.816667	367.961
						0.80625	0.963984		0.8125	1071.66								0.816667	532.406
						0.8	5.55748		0.828571	1094.55								0.9	294.013
						0.85	5.42741		0.80625	1065.06								0.85	144.393
						0.80625	5.31441		0.86875	1128.98								0.95	273.949
						0.86875	5.93621		0.8	1085.1								0.9	131.787
						0.790625	3.45676		0.884375	1106.83								0.8	427.091
						0.8375	2.98301		0.8	1136.71								0.85	416.142
						0.80625	0.531975		0.9625	1169.29								0.93125	478.374
						0.8375	1.27275		0.915625	1105.91								0.9625	608.757
						0.821875	3.23022		0.821875	1124.91								0.95	148.781
						0.879167	1.08263		0.853125	1121.21								0.9	421.644
						0.8	0.0804517		0.816667	1103.56								0.95	419.411
						0.86875	0.514362		0.864286	1096.7								0.9	730.373
						0.920833	1.15618		0.884375	1126.13								0.99375	506.206
						0.86875	4.05278		0.915625	1122.51								0.9	550.157
						0.9625	1.34226		0.86875	1058.09								0.9	369.418
						0.8375	6.43667		0.86875	1117.54								0.85	194.45
						0.8	4.83657		0.816667	1045.53								0.8375	69.6706
						0.9	-1.32687		0.8375	1069.44								0.983333	314.63
						0.85	-0.10395		0.80625	1078.55								1	372.656
						0.8375	2.67733		0.85	1087.47								1	240.515
						0.85	4.71371		0.8375	1020.22								0.9	204.534
						0.854545	1.57165		0.946875	1121.71								0.983333	548.682
						0.93125	3.84933		0.93125	1115.86								1	150.843
						0.86875	5.1301		0.8625	1066.38								0.95	167.033
						0.8	4.39622		0.8875	1066.25								1	217.592
						0.9	4.58907		0.946875	1112.48								0.9625	75.5033
						0.877273	1.63976		0.9	1088.74								1.65	-589.731
						0.93125	6.00403		0.86875	1077.79								1.55	-393.856
						0.86875	1.97566		0.85	1143.07								1.55625	-511.134
						0.95	4.64286		0.93125	1133.93								1.5875	-441.045
						0.9625	2.84483		0.978125	1124.25								1.6	-422.089
						0.9	5.51359		0.9125	1070.7								1.65	-656.623
						1.00417	1.27861		0.9	1139.06								1.61875	-568.287
						0.9	0.2061		0.9375	1067.98								1.7125	-448.178
						0.93125	2.21579		0.8375	1154.98								1.65	-395.229
						0.9625	6.41735		0.816667	1053.57								1.5875	-216.419
						0.99375	2.2526		0.9	1002								1.54286	-107.908
						0.853125	3.60965		0.9	1046.55								1.68125	-545.901
						0.9	1.60961		0.9625	1067.92								1.56667	-324.106
						0.85	4.21235		0.93125	1076.28								1.7125	-226.544
						0.9	4.1197		0.93125	1057.82								1.5875	-259.74
						0.922727	1.51822		0.9625	1160.07								1.7	-417.907
						0.93125	5.16323		0.9	1052.73								1.74375	-521.796
						0.945455	1.68946		0.99375	1062.3								1.65	-29.3317
						0.968182	1.78169		0.9	1030.52								1.54583	-36.9876
						0.86875	0.802417		0.9875	1070.06								1.5875	-64.7691
						0.95	5.43365		0.9625	1023.58								1.62917	-29.3912
						0.990909	1.75411		1.0125	1071.01								1.67083	-51.7987
						1	5.35335		0.983333	1051.71								1.57857	-99.6436
						0.9	-2.777		0.9	1183.08								1.7125	-30.2901
						0.884375	3.50069		0.9	1091.81								1.61429	-138.786
						0.93125	0.394527		0.8375	1041.32								1.75417	-40.7073
						0.95	-0.0210533		0.9	1181.44								1.7125	-284.561
						0.99375	5.23687		0.99375	1074.19								1.75	-404.206
						1	4.52975		0.935714	1096.95								1.65	-117.305
						0.99375	3.88254		0.971429	1095.69								1.68571	-111.987
						0.93125	0.680395		0.95	1141.03								1.72143	-117.22
						1	0.0127561		0.9	1100.61								1.75714	-99.9064
						0.915625	3.38799		0.95	1087.18								1.65	-359.926
						0.99375	0.861443		0.983333	1100.76								1.73333	-346.92
						0.946875	3.60226		0.978125	1108.96								1.65	-709.775
						0.95	4.19801		1.00714	1093.22
						0.99375	0.474605		0.983333	1045.17
						0.9625	2.51012		1	1140.27
						1	4.43214		0.99375	1113.12
						1.01364	1.75008		0.9625	1039.1									326.368
						0.978125	3.32323		0.99375	1135.43									177.907
						0.9	6.98346		1	1081.72
						0.99375	6.04373		1.00937	1123.39
						1.00937	3.33338		1.00937	1108.95									-289.143
						1.56667	-1.60271		1.65	1034.5			2.05						205.721
						1.5875	-9.14028		1.5375	1121.67			1.9375
						1.54583	-2.73806		1.53889	1092.02			1.93889
						1.54062	-4.68691		1.56667	1093.25			1.96667
						1.53889	-3.30563		1.54062	1126.22			1.94062
						1.54286	-3.73626		1.57187	1127.21			1.97187
						1.53889	-4.30785		1.5625	1123.63			1.9625
						1.57187	-4.74086		1.56667	1075.13			1.96667
						1.60312	-4.84623		1.5875	1189.66			1.9875
						1.56667	-4.55245		1.53889	1132.98			1.93889
						1.65	3.04424		1.59444	1092.1			1.99444
						1.55	-7.74271		1.56667	1134.98			1.96667
						1.63437	-4.7605		1.5875	1073.07			1.9875
						1.56667	-3.15644		1.55625	1153.68			1.95625
						1.66562	-4.93501		1.5875	1041.65			1.9875
						1.59444	-4.63133		1.5875	1119.74			1.9875
						1.59444	-3.5128		1.54583	1085.08			1.94583
						1.5875	-2.99508		1.55625	1104.98			1.95625
						1.55625	1.24499		1.61875	1104.22			2.01875
						1.6	-7.54344		1.55	1114.93			1.95
						1.57857	-3.84571		1.55	1086.81			1.95
						1.62917	-2.95751		1.59444	1132.09			1.99444
						1.7125	-9.0174		1.65	1162.29			2.05
						1.65	-1.74047		1.56667	1113.49			1.96667
						1.53889	-6.23839		1.62222	1133.41			2.02222
						1.55625	-0.252104		1.65	1169.07			2.05
						1.73333	-1.98238		1.5875	1201.23			1.9875
						1.61875	-0.252836		1.6125	1119.35			2.0125
						1.65	-11.2371		1.60312	1129.9			2.00312
						1.54583	-7.04414		1.65	1131.73			2.05
						1.56667	-6.38704		1.55625	1170.31			1.95625
						1.62222	-4.4551		1.6	1115.48			2
						1.61429	-3.72991		1.54583	1142.77			1.94583
						1.61875	1.2293		1.5875	1100.94			1.9875
						1.56667	-0.94889		1.65	1193.33			2.05
						1.65	-4.3195		1.55625	1186.07			1.95625
						1.55	-6.1078		1.5875	1083.62			1.9875
						1.62222	-3.20581		1.7125	1099.56			2.1125
						1.59444	-6.25376		1.62917	1080.39			2.02917
						1.56667	-5.36857		1.6	1085.4			2
						1.68125	-0.134886		1.65	1035.98			2.05
						1.65	-3.40227		1.7125	1041.83			2.1125
						1.67778	-4.62425		1.65	1076.77			2.05
						1.62222	-6.38534		1.68125	1106.61			2.08125
						1.65	1.88253		1.67083	1081.15			2.07083
						1.5875	-10.7934		1.7125	1203.88			2.1125
						1.55625	-7.85232		1.56667	1141.72			1.96667
						1.61875	-7.87234		1.7125	1190.16			2.1125
						1.65	3.59559		1.62222	1091.25			2.02222
						1.5875	-1.44717		1.65	1093.51			2.05
						1.65	-3.75654		1.73333	1078.74			2.13333
						1.7125	-1.17057		1.5875	1141.99			1.9875
						1.68125	-7.81474		1.62917	1142.34			2.02917
						1.67778	-3.49307		1.63437	1126.5			2.03437
						1.69687	-4.72407		1.7125	1082.49			2.1125
						1.5875	-7.00189		1.67778	1134.32			2.07778
						1.65	-7.32445		1.6375	1122.92			2.0375
						1.62917	-7.21304		1.67083	1143.89			2.07083
						1.65	-6.57501		1.7125	1144.22			2.1125
						1.67083	-6.82228		1.61875	1184.81			2.01875
						1.65	-11.9184		1.61875	1157.39			2.01875
						1.7125	-10.8151		1.74375	1107.45			2.14375
						1.56667	-8.58269		1.70556	1134.4			2.10556
						1.74375	-8.14926		1.61875	1175.41			2.01875
						1.65	-8.80734		1.68125	1171.19			2.08125
						1.73333	-8.61865		1.74375	1171.21			2.14375
						1.7	-7.75376		1.75417	1146.41			2.15417
						1.55625	-2.33167		1.65	1111.61			2.05
						1.72812	-5.15617		1.5875	1150.36			1.9875
						1.6	-6.12056		1.66562	1128.88			2.06562
						1.68571	-3.72759		1.65	1115.91			2.05
						1.67778	-6.3278		1.65	1139.26			2.05
						1.5875	0.104553		1.73333	1130.54			2.13333
						1.65	-6.20051		1.68125	1157.14			2.08125
						1.7125	-6.7532		1.68125	1185.88			2.08125
						1.61875	-2.53264		1.6625	1123.56			2.0625
						1.70556	-6.256		1.7	1114.19			2.1
						1.67083	-2.77997		1.6875	1119.23			2.0875
						1.7125	-2.88152		1.7125	1121.01			2.1125
						1.68125	-2.35122		1.67778	1092.95			2.07778
						1.65	-5.43957		1.74375	1156.28			2.14375
						1.65	-0.549477		1.56667	1180.06			1.96667
						1.73333	-6.43725		1.7125	1152.22			2.1125
						1.70556	-4.39912		1.70556	1095.76			2.10556
						1.7	-5.79546		1.7375	1120.7			2.1375
						1.75417	-6.83486		1.69687	1129.86			2.09687
						1.76111	-6.65579		1.76111	1132.08			2.16111
						1.70556	-3.33935		1.75	1116.84			2.15
						1.75937	-5.14416		1.65	1175.69			2.05
						1.75	-7.35171		1.74375	1183.85			2.14375
						1.7125	0.0104519		1.7125	1072.14			2.1125
						1.74375	-2.49504		1.65	1088.81			2.05
						1.73333	-0.967694		1.73333	1137.37			2.13333
						1.74375	-0.0391751		1.73333	1109.48			2.13333
						1.68125	1.39075		1.72812	1126.61			2.12812
						1.75	-6.15715		1.73333	1178.49			2.13333
						1.73333	-3.52224		1.7	1088.78			2.1
						1.72143	-3.79474		1.75417	1084.2			2.15417
						1.73333	-5.47067		1.75937	1125.65			2.15937
						1.73333	-4.5943		1.65	1060.97			2.05
						1.75714	-4.05753		1.73333	1092.21			2.13333
						1.74375	1.51643		1.7625	1119.21			2.1625
						1.75417	-2.70483		1.75	1086.48			2.15
						1.76111	-3.44848		1.65	1066.41			2.05
						1.76111	-4.33627		1.76111	1094.94			2.16111
							2.902			1095.81
							2.14713			38.2335
							-4.42159			1122.59
							3.10152			37.8704
