# Supplementary material for: Characterization of interstitial diffuse fibrosis patterns using texture analysis of myocardial native T1 mapping
Source: PLoS One. 2020 Jun 1;15(6):e0233694. doi: 10.1371/journal.pone.0233694 (PMC7263579; doi:10.1371/journal.pone.0233694)
Supplement: S5 Data — (XLSX) [file pone.0233694.s009.xlsx]

## Sheet: Sheet1
Index	Diagnosis	GLRLM																																												LBP
	1-Healthy, 2-HCM; 3-DCM	SRE(0)	SRE(45)	SRE(90)	SRE(135)	LRE(0)	LRE(45)	LRE(90)	LRE(135)	GLN(0)	GLN(45)	GLN(90)	GLN(135)	RLN(0)	RLN(45)	RLN(90)	RLN(135)	RP(0)	RP(45)	RP(90)	RP(135)	LGRE(0)	LGRE(45)	LGRE(90)	LGRE(135)	HGRE(0)	HGRE(45)	HGRE(90)	HGRE(135)	SRLGE(0)	SRLGE(45)	SRLGE(90)	SRLGE(135)	SRHGE(0)	SRHGE(45)	SRHGE(90)	SRHGE(135)	LRLGE(0)	LRLGE(45)	LRLGE(90)	LRLGE(135)	LRHGE(0)	LRHGE(45)	LRHGE(90)	LRHGE(135)	1	2	3	4
1	1	0.00018003	0.000317244	0.000329381	0.000299866	16668.2	16714.7	16824.7	16689.4	48398.1	50820.9	46780.8	50783.1	649.842	660.068	621.716	660.493	0.365729	0.895625	0.852688	0.895922	0.94248	0.953741	0.938962	0.953423	1.33958	1.24641	1.59071	1.24317	0.00010289	0.000300683	0.000310989	0.000270292	0.000934196	0.000387963	0.000428134	0.00042211	15730	15991.8	15902.8	15946.2	22223.7	20549.1	25868.9	20564.6	0.0196169	0.000654772	0.00427669	0.000756036
2	1	0.000196804	0.000353897	0.000379014	0.000334621	15973.3	15979.5	16003.4	15989.1	47022.9	49318.1	41625	49832	637.591	650.223	593.029	658.287	0.361393	0.883766	0.808109	0.888312	0.93583	0.94708	0.914146	0.94927	1.39406	1.3115	1.94915	1.28618	0.000111068	0.000296796	0.000313973	0.000275323	0.00139823	0.000589834	0.000685691	0.000656216	14956.7	15144	14663.1	15199.2	22175.9	20833.4	31099.2	20442.8	0.0194844	0.000218336	0.00066604	0.000211104
3	1	0.000923476	0.00151162	0.00151857	0.00141229	18477.1	18503.7	18487.5	18481.1	50671.8	52745.7	47551.1	52318.6	615.962	626.937	586.399	624.415	0.372617	0.908594	0.861172	0.906109	0.953255	0.962659	0.941903	0.960623	1.26379	1.19109	1.54521	1.20026	0.000609744	0.00136975	0.00131138	0.00118188	0.00611121	0.00250433	0.00276833	0.00268363	17600.7	17818.1	17419.7	17742.8	23447.5	22026.4	28969.6	22250.2	0.0204288	0.000921398	0.000176124	0.000894894
4	1	0.00013771	0.000169924	0.000179169	0.000169674	21784.2	21803.4	21295	21832.9	48091.4	51601.5	45218	51912.8	451.543	470.672	448.153	469.191	0.361979	0.897344	0.832984	0.900266	0.943444	0.958517	0.934424	0.959757	1.47299	1.26603	1.94039	1.25026	0.000103777	0.00014116	0.000147048	0.000141147	0.000487407	0.000289861	0.000337152	0.000288044	20528.6	20879.4	19731.7	20941.9	32779.6	28008.6	47637.7	27487.7	0.0197826	0.000316253	0.0011286	0.000321126
5	1	5.59962e-05	5.58893e-05	5.67459e-05	5.60429e-05	20661.6	20670.7	20299.5	20654.2	43722.2	47542.2	41004.5	47297.7	585.585	611.32	568.193	604.078	0.349772	0.868609	0.792281	0.866891	0.919686	0.939119	0.915336	0.937787	1.55916	1.39789	2.50306	1.40102	5.14349e-05	5.23287e-05	5.20065e-05	5.2515e-05	8.73883e-05	7.84198e-05	0.000126253	7.83263e-05	19012.9	19442.7	18517.7	19381.4	32103.6	28864.4	57942.7	28912.2	0.0189211	0.0014695	0.00624629	0.0014724
6	1	6.76811e-05	6.773e-05	6.74583e-05	6.75342e-05	19843.7	19849.3	19880	19852.1	49141.5	51610.3	46964.1	51430.7	519.292	530.985	500.222	529.905	0.367721	0.900266	0.847578	0.898687	0.946224	0.957647	0.94225	0.956944	1.3173	1.23037	1.72643	1.24087	6.39288e-05	6.47776e-05	6.31408e-05	6.44196e-05	8.97598e-05	8.37448e-05	0.00011446	8.4934e-05	18797.9	19038.1	18812.7	19034.8	25916.3	24195.2	34874.9	24429.3	0.0219365	0.00261919	0.00119292	0.00262688
7	1	0.000208909	0.000485554	0.000505599	0.000484201	17765.4	17794.3	17842.6	17789.6	49207.1	51093.3	47301.5	51389.1	610.467	613.996	582.227	618.975	0.368405	0.897172	0.855453	0.899719	0.946212	0.955197	0.941758	0.956336	1.30436	1.24516	1.56909	1.22761	0.000110372	0.000430237	0.000446548	0.000428992	0.00242054	0.000710886	0.000763438	0.000708313	16817	17021.7	16868.2	17037.3	23164.8	22039.2	27778.6	21758.5	0.022533	0.000874385	0.00525241	0.000718934
8	1	4.48241e-05	4.24213e-05	4.2989e-05	4.20881e-05	34806	40728.8	41717	41016.2	39174.5	47094.6	42166.7	47248.3	441.811	427.639	396.663	434.332	0.325456	0.857578	0.799344	0.8615	0.904366	0.939891	0.922325	0.939789	3.41144	1.5769	2.23402	1.55311	4.13691e-05	3.99926e-05	4.01342e-05	3.94822e-05	7.85783e-05	5.85887e-05	8.27385e-05	5.82255e-05	29739.3	38009.4	38434	38452.6	339269	88704.3	110736	88166.1	0.0226655	0.00178831	0.00682625	0.00178831
9	1	5.41128e-05	5.40045e-05	5.4662e-05	5.39254e-05	23616	23652.1	23515.2	23681.6	51169.1	52883.4	43447.4	52766.7	511.364	519.026	466.613	521.028	0.3739	0.909312	0.821531	0.909391	0.955629	0.963327	0.924244	0.962571	1.24522	1.1897	1.86694	1.18483	5.17437e-05	5.20272e-05	5.07213e-05	5.18645e-05	6.66113e-05	6.40857e-05	9.60765e-05	6.41314e-05	22544.7	22775.7	21704.2	22809.4	29630.5	28174.6	45427.3	27979.4	0.0256313	0.00194193	0.0099245	0.00175722
10	1	0.000428846	0.000381496	0.00040467	0.00038078	23521.2	23637.6	23976.9	23668.5	45395.8	48905.3	43552.5	49136.2	527.663	544.661	494.729	546.498	0.355124	0.879328	0.820406	0.881047	0.928514	0.945482	0.925713	0.946537	1.49145	1.33756	1.93342	1.32828	0.000397618	0.000346941	0.000343341	0.000346314	0.000563758	0.000683658	0.000684554	0.000682285	21844.5	22434.2	22430.6	22500.6	35068.2	31162.4	43408	30823	0.0180264	0.000449029	0.00510349	0.000552873
11	1	0.000811769	0.00101048	0.000842402	0.000945492	20347.4	20368.9	20486	20368.3	49994.3	51516	47521.8	50980.1	552.518	558.596	526.485	555.399	0.370781	0.901062	0.854688	0.896656	0.949903	0.956828	0.94376	0.954532	1.27553	1.22175	1.61313	1.2434	0.000466526	0.000783551	0.000434574	0.000707659	0.0032165	0.00261954	0.00314753	0.00291193	19363.3	19538.6	19445.9	19498	25743.3	24583	32221.1	25078.1	0.0222844	0.000708372	0.00144297	0.000733148
12	1	0.000527677	0.00078095	0.000744437	0.0007454	16419.8	16434	16494.2	16423.6	52007.7	53191.7	48423.5	53472	537.357	541.468	511.684	542.617	0.376953	0.912469	0.867203	0.913906	0.959016	0.964429	0.945971	0.965787	1.20335	1.17007	1.46336	1.16587	0.000302415	0.000614425	0.000584467	0.000584744	0.00304906	0.00175347	0.00236977	0.00192198	15758	15874.8	15664	15877	19666.3	19110.4	23728.1	19055.4	0.0242229	0.00116881	0.00365722	0.000981798
13	1	0.000158964	0.000297063	0.000302277	0.000297111	13300.6	13392.3	13421	13386.6	44602	49247.4	47823.1	49678.1	756.521	783.505	762.578	787.22	0.353301	0.882781	0.86325	0.886984	0.923934	0.946771	0.942922	0.94856	1.51105	1.31325	1.48255	1.29079	0.000116264	0.000291432	0.000296603	0.000292421	0.00108876	0.000328054	0.00034621	0.00032296	12264.5	12710.1	12709.6	12723	20355.3	17429.9	19682.2	17137.2	0.0209424	0.000706502	0.0122606	0.000662256
14	1	0.000919947	0.00125581	0.000885866	0.00118539	19505.8	19543.8	19562.9	19514.2	50368.4	51844.7	46945.6	52124.6	453.762	458.864	430.138	458.524	0.371556	0.902547	0.852203	0.904281	0.951894	0.958524	0.940422	0.959859	1.2708	1.21649	1.61354	1.20994	0.00031336	0.000626083	0.000460876	0.000633266	0.00798531	0.00570619	0.0139111	0.0066605	18540.7	18733.9	18430.2	18707.7	24923.6	23775.9	31813.6	23700.6	0.0190205	0.000914841	0.00228739	0.000681356
15	1	0.000870485	0.00103107	0.000804762	0.00117685	20415.1	20422.9	20676	20412.7	49899.4	51741.9	46090.7	51262.8	473.118	477.379	436.312	474.844	0.370469	0.901719	0.841406	0.898266	0.9495	0.958119	0.937778	0.955935	1.28044	1.22232	1.73296	1.23815	0.000347995	0.000532172	0.00036488	0.000657191	0.00736273	0.00635873	0.00996225	0.00512479	19392.8	19591.3	19544.8	19531.3	25893.9	24747.7	34055.3	25122.7	0.0208596	0.000106089	0.00336403	0.000106089
16	1	0.000916545	0.00175666	0.00185079	0.00179308	10388.3	10321.8	9942.05	10365.7	43506.5	47546.9	39323.1	48005	432.186	449.849	414.166	454.177	0.34735	0.867984	0.782016	0.870328	0.920014	0.939359	0.904469	0.941905	1.64156	1.40642	2.70655	1.40044	0.00045797	0.000754309	0.000757585	0.000809838	0.0452259	0.0126735	0.0151051	0.0127794	9610.95	9726.19	8902.89	9810.9	16129.7	14284.1	38586.9	13995.5	0.0179435	0.000691796	0.00495494	0.000873359
17	1	0.000866381	0.000990937	0.000836751	0.00105976	18637.1	18696.8	18894.9	18693.1	49945.5	52433.1	45869.9	52296.7	545.061	555.251	510.211	553.296	0.370905	0.906781	0.843266	0.906203	0.949533	0.961162	0.935317	0.960424	1.2756	1.19816	1.66673	1.19737	0.000528231	0.00080618	0.000547945	0.000862794	0.00293125	0.00273346	0.0039325	0.00239164	17728.9	18014	17825	17990.5	24281.7	22183.5	30138.6	22170.9	0.0199483	0.00128063	0.00112714	0.00123872
18	1	0.00040604	0.000729589	0.000770878	0.00073555	13583.3	13581.9	13540.2	13596.2	45603.8	48464	46815.6	48885.8	505.408	521.503	499.364	521.956	0.355469	0.876078	0.849031	0.879484	0.929848	0.943423	0.940545	0.945287	1.49718	1.35747	1.65921	1.33512	0.000231442	0.000365402	0.000404992	0.000374122	0.0153105	0.0051231	0.00525019	0.00506806	12631.9	12818.1	12716.5	12871.3	20120.1	18326	22419.3	18037.8	0.018424	0.00231976	0.0026178	0.00223868
19	1	0.000125184	0.000141501	0.000149908	0.000141472	20889.6	20916.1	20957.7	20937.4	47906	49952.8	42336.3	49619.7	586.035	595.05	537.945	596.684	0.364036	0.88925	0.807469	0.886969	0.940237	0.949758	0.920496	0.948173	1.36734	1.27783	2.07198	1.2888	0.000108296	0.000138571	0.000145046	0.00013828	0.000199377	0.000157451	0.000208559	0.000158817	19638.5	19876.7	19372.8	19879.7	28641.1	26674.6	44113.7	26858	0.0201637	0.000360063	0.000514687	0.000244472
20	1	0.000578333	0.000720898	0.000728532	0.000664778	23349.7	24154.6	24551.3	24415.1	42285.4	48931.2	43741.4	49492.3	542.649	582.98	537.175	584.426	0.341185	0.877687	0.821281	0.881313	0.916132	0.946288	0.927039	0.949147	1.90379	1.36516	2.08074	1.35909	0.000388657	0.000643869	0.000550495	0.000561382	0.00258811	0.00179096	0.00156253	0.00206776	21194.7	22925.8	23051.6	23395.5	51251.9	32498.1	49661.1	31541.2	0.0213898	0.00186693	0.00516957	0.00181506
21	1	0.000100415	0.000117187	0.0001037	0.000117672	18217.1	18228.1	18209.3	18232.9	44529.9	47889.1	39311.6	46709.7	652.34	677.58	595.08	668.324	0.351562	0.869344	0.779672	0.861766	0.924952	0.941436	0.905012	0.93529	1.60411	1.41065	2.34894	1.44239	6.79307e-05	0.000100028	6.76513e-05	9.99838e-05	0.000247558	0.000196414	0.000302889	0.00019913	16855.4	17162.4	16513.8	17068.7	29522.6	25747.4	43928.2	26383.3	0.0169163	0.000507955	0.00410979	0.000582037
22	1	4.78718e-05	4.78498e-05	4.79669e-05	4.78757e-05	23352.7	23358.5	23334.6	23345.5	45147.6	47671	38316.4	47578.5	660.39	677.753	598.524	675.54	0.354121	0.870109	0.775312	0.867641	0.927476	0.939582	0.897914	0.93989	1.51553	1.38682	2.35256	1.42715	4.44135e-05	4.49729e-05	4.31754e-05	4.49991e-05	7.21071e-05	6.61281e-05	0.000111497	6.77114e-05	21678.9	21971.5	20936.6	21967.2	35227.1	32226	54574.6	33277.2	0.0188714	0.00238225	0.000100781	0.00247088
23	1	0.000106319	0.000140138	0.000125861	0.000139538	22036.3	22038.4	22088.7	22020.9	44726.5	48203.5	44147.7	49000.2	734.785	761.192	721.404	768.559	0.352832	0.875203	0.833297	0.881125	0.925289	0.941844	0.925418	0.945618	1.53811	1.35554	1.69856	1.32398	5.50489e-05	9.45484e-05	7.46548e-05	9.44186e-05	0.000612933	0.000408008	0.000517278	0.000404086	20425.9	20801.2	20514	20858.2	33498.3	29559.4	36913.1	28928.6	0.0200146	0.000301745	0.00732389	0.00020715
24	1	0.000542562	0.00077549	0.000651057	0.000739695	17216	17237.8	17377.8	17283	48651.9	51337.8	46399.2	51455.6	619.923	632.607	591.429	634.408	0.366217	0.89925	0.848734	0.899484	0.943974	0.956152	0.937534	0.956876	1.34024	1.2311	1.64031	1.23414	0.000197382	0.000470402	0.000357243	0.00042355	0.00630932	0.0047361	0.00658942	0.00525815	16246.6	16483	16369.2	16565.2	23225.3	21212.5	27671.9	21121.5	0.0216051	0.00126835	0.00167742	0.0013337
25	1	0.0023607	0.00331547	0.00271028	0.00352318	18178.7	18185.7	18081.5	18210.1	48767.5	50552	43866.3	50572.7	448.408	456.233	409.918	456.273	0.364857	0.889813	0.820266	0.8895	0.946223	0.953999	0.928422	0.954206	1.45527	1.33051	2.01825	1.32592	0.000623554	0.000999793	0.000850189	0.00107514	0.163956	0.107773	0.186369	0.0975058	17181.3	17350	16742	17391.9	23953.2	22615.5	34880.9	22592.7	0.0217046	0.00239473	0.000846447	0.00226115
26	1	0.000444366	0.000646948	0.000530048	0.000546073	22561.6	22600.7	22545.2	22541.4	47860.4	50079.9	42844	49290.7	545.505	555.043	493.118	550.889	0.363581	0.890844	0.8145	0.882969	0.940244	0.950196	0.921948	0.94711	1.37091	1.26885	1.93044	1.31941	0.000184318	0.000518508	0.00036953	0.00040639	0.00196923	0.0013986	0.00236327	0.0019441	21170.3	21442.1	20746.2	21281.3	31331.8	28832	44380.4	30141.7	0.0184737	0.000634284	0.0038439	0.000861623
27	1	0.000625422	0.00160657	0.00168325	0.0016478	18147.2	18149.2	18192.5	18179.1	46082.5	50283.2	47415.4	49770.6	594.93	615.537	586.578	613.638	0.357409	0.889672	0.857219	0.886156	0.93211	0.951914	0.94217	0.949474	1.52486	1.28998	1.5633	1.3061	0.000210077	0.000818867	0.00087453	0.000900705	0.0910769	0.0207149	0.0216227	0.0211156	16917	17306.1	17184.2	17303	26016.9	23010.7	27730.3	23185.7	0.0181755	0.000993134	0.0101399	0.0012293
28	1	0.00110318	0.00323734	0.00340077	0.00327491	22663.8	22612.7	22408.3	22725.8	42779.8	48176	43920	48001.4	319.94	334.828	317.1	336.57	0.330697	0.843187	0.801891	0.842219	0.932185	0.954789	0.937362	0.953689	11.5838	2.61293	3.12804	2.46937	0.000574884	0.00134182	0.00136906	0.00135427	0.509596	0.06472	0.0679184	0.064505	21283	21213.8	20566.6	21241.1	1.5517e+06	233292	258188	208821	0.0170323	0.000524251	0.00821797	0.000480998
29	1	0.000660767	0.0015316	0.00153002	0.00154862	15428.7	15452.4	15433	15426.6	50133.2	52216.6	47688.5	52138.9	617.696	625.825	597.951	626.381	0.370937	0.905438	0.863609	0.904297	0.950845	0.96014	0.941917	0.959968	1.28984	1.20256	1.48186	1.21147	0.000209375	0.000782388	0.000732836	0.000771931	0.0272744	0.00896838	0.0100701	0.0086043	14663.9	14860.9	14554.4	14816	19562.4	18411.9	22847.6	18613.6	0.0226655	0.00126173	0.00278664	0.00157536
30	1	5.21112e-05	5.24966e-05	5.2668e-05	5.24138e-05	26856.4	26667.9	26633.4	26767.7	45926.9	49220.9	43997.4	49027.1	472.099	485.788	458.09	481.915	0.357454	0.882828	0.823734	0.880109	0.930664	0.946597	0.928089	0.946053	1.44908	1.31357	1.98562	1.33286	4.82733e-05	4.96237e-05	4.88188e-05	4.94741e-05	7.77852e-05	6.90275e-05	9.94209e-05	7.02598e-05	25165.1	25316.6	24794.6	25457.3	37550.3	34639.7	54210	34946.3	0.0191365	0.00134459	0.00362847	0.00139726
31	1	7.31172e-05	7.33294e-05	7.29405e-05	7.32804e-05	15930.3	15929.4	15993.6	15943.5	46123.5	49755	46934.9	49252.9	719.658	741.4	710.123	735.85	0.358939	0.888437	0.851719	0.884078	0.931083	0.948657	0.940346	0.946494	1.4226	1.27921	1.61181	1.30334	6.78516e-05	6.95269e-05	6.82861e-05	6.92713e-05	0.000104588	9.38367e-05	0.000118649	9.56434e-05	14868.1	15148.3	15118.6	15138.3	22450.3	20174.7	25513.9	20528.9	0.0196004	0.00113263	0.00697599	0.00116507
32	1	0.000132636	0.000269826	0.000248432	0.00023571	31615.9	32959.6	33793.3	33417.3	41724.6	48573.8	42418.7	47529.3	506.485	534.949	484.971	524.107	0.337012	0.868297	0.806797	0.859812	0.915222	0.94725	0.921651	0.942427	2.58773	1.53389	2.1341	1.55855	5.77032e-05	0.000213445	0.000157896	0.000151451	0.00140302	0.000501837	0.000638767	0.000581957	28357.8	31030.2	31243	31341.5	200989	76224.4	90461.4	69825	0.0223507	0.000689697	0.00815246	0.000515796
33	1	0.000491147	0.000736335	0.00063395	0.000733622	14605.2	14629.9	14682.9	14630.4	46917.1	48538.3	42083.9	48826.4	768.309	782.174	712.182	786.943	0.359486	0.87725	0.813703	0.879547	0.936587	0.94367	0.915837	0.944964	1.44963	1.35509	1.86839	1.3379	0.000154252	0.000337878	0.000259626	0.000351663	0.0118869	0.00733443	0.0104347	0.00767194	13651.8	13795.8	13467.2	13815.3	21328.5	19923.7	27306.8	19666.8	0.0194181	0.000267148	0.00220664	0.000198832
34	1	0.00093372	0.00135668	0.00129867	0.00137334	21716.6	21905.3	21783.9	21945.1	38879.5	44947.6	39713.3	45958.8	563.39	607.7	566.294	618.778	0.328717	0.844437	0.783625	0.851688	0.897514	0.927841	0.90755	0.933153	2.06021	1.58008	2.43109	1.54564	0.000256293	0.000651241	0.000456851	0.000645483	0.0279597	0.0175576	0.0216644	0.0197039	19447.9	20365.3	19804.3	20541.9	45372.3	34098.5	55751.2	33167.1	0.017927	0.000813494	0.00162404	0.000760209
35	1	0.000138782	0.00015423	0.000158831	0.000154968	19499	19509.3	19502.7	19471.5	46491.4	50116.4	46909.6	49632.8	648.396	671.135	641.223	667.582	0.359225	0.890297	0.854172	0.886828	0.933604	0.950574	0.93934	0.948314	1.43085	1.27447	1.56317	1.29158	0.000120481	0.000150866	0.000155133	0.000151707	0.000221802	0.000172331	0.000191644	0.000172775	18232.2	18583.7	18362.7	18485.5	27612.3	24581.7	30302.6	25053.7	0.017579	0.00132821	0.00576772	0.00131293
36	1	0.000187352	0.000216589	0.000204102	0.000218448	16877.5	16931.7	16801.5	16895.1	42721.6	49720.5	47104.1	50402.4	529.465	574.976	561.734	577.244	0.344238	0.883109	0.853859	0.888109	0.916974	0.950074	0.941205	0.953293	1.78175	1.33785	1.70059	1.31955	0.000136616	0.000197386	0.00017039	0.000200934	0.000441751	0.000308359	0.000369539	0.000297742	15506.8	16145.3	15870.4	16145.8	29910.9	22230.4	32135.5	22053.1	0.0174465	0.000651676	0.00825385	0.000578459
37	1	0.0010355	0.00148299	0.00124596	0.00151154	16962.4	16918.9	16543.2	16924.1	46585.9	49926.2	44003.4	50594.4	390.065	402.698	382.445	405.609	0.357363	0.884766	0.823297	0.889938	0.93586	0.950984	0.928313	0.953929	1.50535	1.32765	2.00061	1.29823	0.000383236	0.000821878	0.000589326	0.000867419	0.011511	0.00662675	0.0152477	0.00637117	15872.3	16066.3	15218.3	16133.2	25477.7	22597.9	38868.9	22157.1	0.0171317	0.0010295	0.0011102	0.00100932
38	1	0.000911185	0.0013464	0.00125445	0.00159847	17256.3	17243	17145.2	17271.5	45766.6	49776.2	47811.1	50008.5	551.02	570.27	557.942	571.526	0.354668	0.884703	0.863328	0.886687	0.931901	0.950067	0.943009	0.950977	1.57531	1.33449	1.50739	1.31356	0.000289941	0.000420042	0.000409215	0.000531515	0.087517	0.0443776	0.0480833	0.035144	16094.4	16398.1	16136.4	16454.2	25825.9	22390	26125.8	22035.5	0.0160547	0.000852871	0.00898019	0.000579712
39	1	0.000380094	0.00114698	0.00118337	0.00113095	17932.3	17919.3	17956.1	17914.5	48343.1	51598.1	47220.7	51349.8	514.09	522.994	495.348	521.772	0.365163	0.899734	0.85625	0.897594	0.942544	0.957726	0.941046	0.956706	1.35856	1.23519	1.5677	1.24778	0.000190122	0.000910222	0.000919814	0.000879534	0.0158804	0.00248467	0.00266539	0.00252804	16900.4	17162	16925.2	17137.3	24160	22174.7	28166.2	22427.6	0.0190536	0.000331935	0.00414209	0.000350148
40	1	0.000661125	0.00101609	0.00089537	0.000910116	18821.9	18830.9	18878.2	18828	51183.9	52607.2	48426	53324.7	514.152	518.146	493.513	521.217	0.374447	0.908078	0.867344	0.912797	0.955384	0.961893	0.945959	0.965163	1.23745	1.19025	1.46892	1.17123	0.00028591	0.000557021	0.000465738	0.000472467	0.0117141	0.00570786	0.00798128	0.00697357	17988.5	18131.5	17905.3	18186	23067.5	22261.9	27312.5	21884	0.0197163	0.000335603	0.00190543	0.000142246
41	1	0.000387287	0.000665713	0.00063816	0.000733156	20063.1	20076.3	20071.2	20059.5	50038.8	51855	48248.3	52265.9	478.303	482.995	462.052	485.787	0.370566	0.901641	0.864891	0.905	0.9504	0.95886	0.945611	0.960605	1.28874	1.22676	1.50875	1.21019	0.000124276	0.000228129	0.000213141	0.000301467	0.0193967	0.0105812	0.0123798	0.00998748	19069.3	19265.3	19015.1	19276.8	25517.4	24384.5	30405.2	24126.6	0.0186228	0.0010332	0.00237211	0.00100771
42	1	0.000205829	0.000275914	0.000249645	0.000258806	14762.6	14770.3	14867.3	14784.7	49577.3	51422.7	46801	50752.8	572.955	581.07	542.386	577.72	0.369004	0.899281	0.851688	0.894375	0.948434	0.956683	0.939425	0.953676	1.32303	1.23279	1.59988	1.25762	0.000156261	0.000258905	0.000214009	0.000227849	0.000611114	0.000348691	0.000504606	0.000388419	13998.2	14132.3	14016	14112.3	19753.4	18244.9	23232.6	18578.5	0.0199152	0.00068839	0.00396264	0.000731587
43	1	0.000272477	0.000556408	0.000574599	0.000556555	19330.7	19360.2	19373.1	19342.6	45059.8	50466.2	47630.5	49422.9	535.672	556.515	536.075	551.036	0.353809	0.891344	0.859969	0.883078	0.92699	0.952586	0.942797	0.947973	1.51392	1.27483	1.55809	1.32084	0.000152849	0.000513788	0.000530035	0.000509888	0.0035041	0.000732138	0.000772252	0.000749943	17939.8	18482.1	18312.2	18369.2	29046.8	24407.6	30064.9	25357.5	0.0170157	9.46818e-05	0.00990823	7.65436e-05
44	1	4.69151e-05	4.68439e-05	4.69036e-05	4.68515e-05	24931.5	24955.2	24942.2	24967.4	47022.3	48706.6	40974.1	48944.9	552.787	561.189	507.471	560.801	0.361198	0.879969	0.797031	0.880469	0.935983	0.943933	0.912915	0.945494	1.3987	1.32466	2.17651	1.33182	4.40136e-05	4.43021e-05	4.28341e-05	4.43647e-05	6.4466e-05	6.1341e-05	9.81901e-05	6.15755e-05	23300.3	23525.3	22761.7	23592.1	35290	33320.1	55823.5	33496.1	0.0198158	0.000985462	0.0017766	0.0011033
45	1	0.000186851	0.000287865	0.000284626	0.000254278	24853.7	24839.2	24572.5	24790.8	51213.7	53134.4	47348.1	52714.5	469.869	478.576	453.357	475.676	0.373398	0.910578	0.858234	0.90725	0.956259	0.964543	0.941346	0.962829	1.25958	1.18445	1.54736	1.20285	0.000113274	0.000270689	0.000240769	0.000200552	0.000758869	0.000434749	0.000473664	0.000471354	23765.6	23955.6	23000.8	23838.1	31307.5	29527.3	39812.2	30123.9	0.0172808	0.00102166	0.00134204	0.000996262
46	1	0.000111186	0.000127738	0.000113426	0.000127538	23340.1	23329.4	23279.9	23306.7	45982.3	48582.9	44440.8	48788.5	523.312	532.787	509.213	537.758	0.358138	0.878687	0.830578	0.879891	0.930593	0.943474	0.928914	0.944555	1.43403	1.33505	1.7966	1.33305	8.02916e-05	0.00011146	8.15608e-05	0.000111286	0.000242612	0.000197974	0.000265672	0.0001979	21744.9	22038.4	21632.8	22031.1	33334.9	31109.3	42455.2	31169.4	0.0164358	0.00124742	0.00395987	0.00135167
47	1	0.000712388	0.000977296	0.000933506	0.000994427	15845.6	15805.6	15584.8	15831.8	50040.6	52263.9	48042.5	52374.8	401.238	408.709	392.202	409.743	0.37002	0.904141	0.859391	0.90475	0.950839	0.960767	0.946141	0.961377	1.30786	1.21493	1.6127	1.21729	0.000401837	0.000643623	0.000679101	0.000676431	0.00992825	0.00608295	0.00842312	0.00611307	15062	15155.3	14670	15205	20867	19453.2	28003.8	19426.9	0.0175128	0.000784988	0.000199509	0.000569445
48	1	8.02775e-05	0.000114766	0.000116872	0.000114752	20146.7	20215.1	20252.5	20227.7	45186.9	49233.9	46554.7	49313.2	607.173	627.26	605.742	627.995	0.354811	0.881828	0.850578	0.882844	0.927166	0.947032	0.937944	0.9473	1.49023	1.32672	1.6103	1.32031	5.97337e-05	0.000111563	0.000113164	0.000111642	0.000255143	0.000133937	0.000152004	0.000133703	18670.7	19183.8	19061	19200.6	30080.3	26629.2	32494.5	26382.6	0.0196666	0.00047792	0.0105897	0.000438967
49	1	0.00144132	0.00180779	0.00126261	0.00193215	22126.2	22173.5	21890.6	22091.6	52231.4	53635.6	44885.5	53325.8	406.298	412.107	380.236	410.111	0.376576	0.913656	0.830984	0.911703	0.960738	0.966854	0.932347	0.965443	1.22164	1.17245	1.8759	1.18035	0.000529776	0.000891308	0.000570572	0.00115607	0.0136064	0.0104715	0.0248971	0.0111444	21268.2	21483.1	20358.2	21317.7	26805.5	25623	43322.1	25995.8	0.0202962	0.00166897	0.00782028	0.00155381
50	1	0.00101931	0.00126483	0.000660791	0.00120799	30021.5	29884.6	29829.1	29735.8	44696.1	50628.2	43688.1	47662.5	412.215	434.332	400.13	423.238	0.347422	0.884516	0.817797	0.859156	0.930188	0.956302	0.928088	0.943729	1.99314	1.45585	2.11192	1.61718	0.000157582	0.000266593	0.000180852	0.000234552	0.0554088	0.0435266	0.124509	0.0471527	28047.7	28557.7	27631.1	27943.5	99083	60928.2	80099.8	63147.7	0.0201968	0.000360823	0.00545139	0.00056811
51	1	0.000461047	0.000701148	0.000617914	0.000631619	13603.2	13618.8	13632.5	13635.1	46367.9	49035.8	44825.6	48585.2	624.05	638.288	605.616	633.655	0.359401	0.881687	0.834187	0.878281	0.932522	0.945694	0.93076	0.943567	1.41823	1.3197	1.79681	1.33663	0.000232904	0.000387055	0.000298173	0.000325313	0.00688866	0.00371906	0.00483345	0.00398657	12688.4	12903.9	12713.3	12891.7	19145.9	17843.1	24200.3	17982.4	0.0188548	0.000347092	0.00709134	0.000427302
52	1	0.00012224	0.000191613	0.000195323	0.000190173	17887	17879.8	17938.8	17886.8	49794	52370.9	48304.4	51963.1	635.496	649.016	615.554	645.547	0.370462	0.907016	0.867344	0.904	0.948807	0.960687	0.945059	0.958886	1.27863	1.19299	1.45635	1.20693	8.57976e-05	0.000188421	0.000189994	0.000185481	0.000428923	0.000206624	0.000235466	0.000211736	16989.8	17193.5	16999.3	17171.3	22742	21251	25705	21475	0.0196004	0.000652296	0.00490449	0.000609212
53	2	0.000335932	0.000330965	0.000410671	0.000331684	24758.1	24768	24795	24767.7	50679.7	52932.4	49900	52705.7	588.491	598.918	580.528	597.498	0.373132	0.911141	0.883156	0.908828	0.952895	0.963154	0.951252	0.962328	1.24579	1.17422	1.34496	1.18731	0.000302703	0.000277792	0.000408358	0.000278335	0.000626544	0.00054494	0.000427351	0.000546755	23606.7	23875.3	23611.4	23855.5	30773.8	28967.1	32980.7	29307.2	0.0206939	0.000902397	0.000179214	0.00126002
54	2	4.51281e-05	4.50405e-05	4.50523e-05	4.50143e-05	26434.2	26458.9	26480.4	26469.6	48216.2	52301.2	50426.7	52182.3	616.302	640.166	628.429	638.378	0.365078	0.906703	0.891219	0.905406	0.941723	0.960331	0.952428	0.959955	1.35231	1.19371	1.27824	1.20395	4.26723e-05	4.34036e-05	4.30467e-05	4.33369e-05	5.95708e-05	5.29246e-05	5.65461e-05	5.341e-05	24879.5	25398.6	25228.9	25405.9	36023	31665.2	33883.8	31906.7	0.0238916	0.000782573	0.012907	0.00109765
55	2	0.000804525	0.00152863	0.00158511	0.0015854	25374.8	25319.1	25157.4	25320.4	51169.2	53726	49899.9	53206.6	511.826	519.618	499.769	517.624	0.373431	0.914578	0.881094	0.911281	0.956048	0.967178	0.951988	0.964813	1.26791	1.16744	1.38606	1.18045	0.000328422	0.000825252	0.000839686	0.000894798	0.0233338	0.00807954	0.00821588	0.00783491	24300.4	24511.1	23943.6	24459.8	31378.7	29342.9	36345.1	29688.2	0.0225495	0.000622178	8.28418e-05	0.000806903
56	2	5.91858e-05	5.79011e-05	5.83455e-05	5.79557e-05	28621.7	28624.7	28646.1	28601.3	44503.4	50925.9	48787.7	50766	571.224	619.31	605.148	618.048	0.350671	0.896656	0.872516	0.895516	0.925512	0.954163	0.947051	0.953423	1.61387	1.24103	1.44195	1.24631	5.6246e-05	5.60948e-05	5.62099e-05	5.61357e-05	8.25007e-05	6.72729e-05	7.57355e-05	6.7395e-05	26499.3	27324.5	27168.7	27266.8	46187	35487.6	41389	35707.3	0.0241732	0.00112096	0.0132878	0.000985305
57	2	0.000476778	0.000763115	0.000583226	0.000724185	23023.7	23023.8	23021.9	23003.5	50763.9	52702.7	49067.5	53043.9	486.052	494.18	473.885	495.856	0.372799	0.908188	0.872969	0.910469	0.953753	0.962497	0.948766	0.964053	1.26286	1.19345	1.43558	1.18452	0.000191629	0.000347557	0.000242797	0.000357685	0.0131173	0.00593514	0.00879525	0.0067838	21974.2	22181.6	21855.8	22186.3	28661.7	27222.9	32699.4	27061.2	0.0189708	0.000931484	0.00190651	0.0010274
58	2	5.9862e-05	5.97214e-05	5.97812e-05	5.97622e-05	19173.5	19176.5	19172.3	19145	43610	49290.3	46157.1	49042.2	698.735	743.072	712.981	740.147	0.349004	0.884578	0.850875	0.881969	0.919584	0.946614	0.934797	0.945732	1.58584	1.30069	1.55711	1.32194	5.51725e-05	5.662e-05	5.5944e-05	5.65934e-05	9.33484e-05	7.706e-05	9.18171e-05	7.79995e-05	17644.8	18165	17938.4	18106.6	30315.8	24858.5	29783.5	25394	0.0192856	0.000574133	0.00949438	0.000584188
59	2	0.000528577	0.00114647	0.0011866	0.00112935	27469.3	27473.6	27446.7	27453.7	51033.3	54117.7	51657.6	54098.5	596.993	611.943	599.152	611.83	0.373594	0.918422	0.899906	0.918453	0.954959	0.968591	0.958046	0.968466	1.25136	1.14582	1.23568	1.14489	0.000315265	0.00109417	0.00114584	0.00106423	0.00553988	0.00135648	0.00135223	0.00139053	26222.2	26604.8	26281	26570.5	34351	31491.7	34073.2	31524.9	0.02303	0.000283241	0.00951232	3.20854e-05
60	2	0.00195667	0.00268094	0.00215374	0.00258324	39507.2	39494.9	38949.2	39561.4	56525.6	57252.2	52560.3	57170.1	247.111	248.096	237.956	247.664	0.387878	0.936063	0.896125	0.935625	0.979845	0.982704	0.965476	0.982318	1.11061	1.08493	1.43671	1.08557	0.000820171	0.00154914	0.00115162	0.00133221	0.0219073	0.0161099	0.0253966	0.0155137	38706	38784.5	37398	38889.9	43872	42835.2	64758.4	42767.2	0.022301	0.00227745	0.00611483	0.00178056
61	2	0.000304786	0.000554239	0.000642601	0.000727311	25386.8	25258.4	25034.1	25287.7	51117.3	54156.7	51139.2	53622	429.259	442.512	428.368	438.97	0.373229	0.917969	0.887156	0.914094	0.955681	0.968924	0.959043	0.966662	1.25677	1.14982	1.52841	1.16851	0.00012898	0.000324819	0.00037155	0.00052056	0.00546393	0.00222946	0.00189585	0.00155588	24293	24434.8	23913.2	24423.1	31561.5	29282.4	40955.4	29670.9	0.0240076	0.00151392	0.0141163	0.001831
62	2	0.000272582	0.000546295	0.000491928	0.000545243	19607.3	19653	19642.9	19684.1	48617.7	51473.8	48224	51730.8	492.202	503.845	486.555	505.629	0.366478	0.900453	0.868391	0.901937	0.943542	0.956695	0.944217	0.957965	1.33272	1.22379	1.44427	1.21918	0.000122173	0.000491553	0.000424231	0.000490495	0.00214282	0.000768078	0.00109515	0.000767268	18457.2	18771.9	18533.3	18845.9	26636.1	24270.9	28885	24091.3	0.0199152	0.000730697	0.00545303	0.00103986
63	2	0.000101611	0.000426673	0.000435843	0.00042711	22583.2	22597.7	22652	22616.7	49899.7	52977.5	50459.5	52930.4	631.467	647.325	628.227	644.32	0.369863	0.910875	0.889078	0.90975	0.949972	0.963465	0.953336	0.963503	1.30366	1.17627	1.30486	1.18659	6.36805e-05	0.000270465	0.00027531	0.000270688	0.0103797	0.001053	0.00108411	0.0010548	21443.7	21775.3	21625.3	21809.5	29315	26551.9	29220.2	26739.2	0.0220691	0.000794459	0.0116973	0.000355646
64	2	0.000305744	0.000578917	0.000516785	0.000647198	18417.9	18461.8	18527.4	18480	48518.3	52154.3	49421.3	52294.9	650.447	670.156	649.915	671.208	0.365866	0.905219	0.880859	0.906281	0.943286	0.959825	0.948644	0.960421	1.34505	1.20365	1.34638	1.19792	0.000107604	0.000295947	0.000212792	0.00030971	0.0114073	0.00573454	0.00619924	0.0046244	17332.4	17710.1	17604.9	17753.8	24894.9	22224.7	24666	22098.3	0.0227318	0.000156617	0.00943067	7.15413e-05
65	2	8.11031e-05	0.000149243	0.000154872	0.000149681	28362.7	28344	27768.6	28342	47036.6	51175.1	47419.8	50750.6	519.756	541.035	533.97	539.28	0.360475	0.897906	0.857375	0.894141	0.936677	0.955472	0.942354	0.953779	1.42448	1.23913	1.62119	1.26225	4.63698e-05	0.000147381	0.000152584	0.000147743	0.000387428	0.000158975	0.000175342	0.000160428	26586.9	27104.8	26020.5	27054.1	40149.4	35061.6	50793.6	35719.7	0.0220856	0.000862502	0.00991288	0.000882964
66	2	0.000632629	0.00199264	0.001982	0.00193446	21846.8	21927.2	21957.2	21930.6	47168.7	52100.1	49276.5	51276.1	448.559	464.628	449.814	461.956	0.361113	0.904078	0.876563	0.89875	0.937309	0.959718	0.948974	0.955883	1.45146	1.20938	1.3893	1.23373	0.000177794	0.00107502	0.00105657	0.0011152	0.0613799	0.0134797	0.0144817	0.0149516	20430.6	21064.3	20864.5	20979.6	30879.8	26305.1	30104.1	26795	0.0205448	0.000361214	0.0110689	0.000124755
67	2	5.10542e-05	5.05446e-05	5.02354e-05	5.06459e-05	24493.4	24700.8	24776.9	24652.5	44968.1	50568.7	49379.8	50077.6	505.142	533.878	524.914	529.541	0.352845	0.891906	0.875891	0.888625	0.927201	0.953123	0.95015	0.950778	1.55079	1.27375	1.42448	1.28918	4.76195e-05	4.82645e-05	4.77138e-05	4.82957e-05	7.49573e-05	6.35725e-05	7.28462e-05	6.39897e-05	22618.7	23533.4	23545.7	23403.6	39475.2	31569.8	34773	32121.8	0.0217543	0.000773594	0.0121644	0.000750155
68	2	9.7081e-05	0.000110672	9.47162e-05	9.3845e-05	29090.1	29228.5	29305.7	29224	47009.1	53369.5	50798.1	52726.9	613.34	661.511	650.1	658.071	0.358822	0.914047	0.892875	0.909969	0.93789	0.965114	0.954515	0.962171	1.48733	1.16173	1.28769	1.17858	8.11063e-05	0.000109376	7.98031e-05	7.95682e-05	0.000168869	0.000116647	0.000158803	0.00015189	27211.3	28197.7	27997	28107.1	44141.1	34003.1	37361.5	34518.6	0.0312314	0.000102056	0.0178938	0.000555487
69	2	7.24092e-05	0.000140344	0.000144914	0.000140365	35213.1	35185.8	35211.5	35213.6	50972.7	53160.3	48991.7	52961.2	578.75	590.67	564.721	589.36	0.373737	0.911469	0.874625	0.911344	0.954443	0.964508	0.947648	0.963269	1.24287	1.17883	1.40324	1.17289	3.99593e-05	0.000139195	0.000143213	0.000139182	0.00035893	0.000146112	0.000157721	0.00014593	33636.2	33942.1	33391.3	33947.6	43593.3	41384.9	49221.8	41127.9	0.0184406	0.000208591	0.000478192	0.000449336
70	2	0.00131468	0.00184492	0.00169453	0.00184985	25678.4	25637	25550.7	25660.1	47921.1	51810.1	47925.5	51203.1	444.495	459.338	439.054	457.234	0.360651	0.896266	0.859734	0.891359	0.943578	0.960645	0.945284	0.95804	1.67647	1.35528	1.61729	1.36246	0.000424164	0.000471125	0.000351207	0.000440881	0.299888	0.148576	0.161458	0.129563	24261.3	24670.8	24147.8	24643.1	35057.6	30904.7	37593.8	31512.7	0.0217708	0.00146349	0.0062305	0.00115714
71	2	4.21687e-05	4.19137e-05	4.16988e-05	4.20853e-05	27280.9	27431.9	27554.3	27318.3	45331	49985.5	46885.7	49809.8	530.787	556.862	538.894	556.687	0.354779	0.889938	0.858484	0.888391	0.92839	0.949805	0.937711	0.949067	1.50762	1.27281	1.50119	1.28259	3.92364e-05	3.98049e-05	3.90233e-05	4.00421e-05	6.18934e-05	5.3266e-05	6.40791e-05	5.32222e-05	25284.2	26074.6	25896	25881.1	41886	34799.7	40321.4	35387.9	0.0221685	0.000146714	0.0120303	0.000389828
72	2	0.000807011	0.00115499	0.000958462	0.00119025	28088.7	28052.5	27830.2	28055.4	52870.7	54773.9	49888.8	54384.1	382.637	389.86	374.322	388.477	0.378626	0.921703	0.878547	0.919	0.963469	0.971731	0.952946	0.97008	1.19638	1.13635	1.45969	1.14921	0.000534876	0.000936775	0.000649131	0.000995302	0.00488232	0.00263629	0.00409568	0.00258047	27090.8	27267.6	26504.3	27226.6	33379.1	31822	43770.8	32175.8	0.0191862	0.00115036	0.000305505	0.00141709
73	2	5.65464e-05	5.66413e-05	5.69504e-05	5.65745e-05	24535.6	24515.6	24449.5	24539.1	52223.5	53847	48523.3	53697.9	453.157	459.695	434.812	459.808	0.376921	0.915188	0.868094	0.9155	0.960463	0.967752	0.94665	0.96676	1.21323	1.16527	1.4975	1.15825	5.4363e-05	5.49633e-05	5.41021e-05	5.48213e-05	6.76193e-05	6.48615e-05	8.08059e-05	6.47606e-05	23549.6	23695.7	23098.9	23699.7	29975.4	28857.1	37571.7	28556.5	0.0187057	0.000263602	0.000351077	0.000464172
74	2	0.000201935	0.000389112	0.000407165	0.000385643	23125.8	23151.3	23096.7	23161.1	50121.2	52545.7	47573.6	52165.2	532.097	540.511	511.435	539.572	0.371283	0.907516	0.861781	0.905219	0.950435	0.961676	0.941766	0.959875	1.26942	1.1945	1.50854	1.20333	9.71287e-05	0.000348416	0.000363394	0.000341506	0.00140948	0.000553915	0.000595018	0.00056425	21955.8	22257.2	21730.1	22232.6	29488	27683.3	35399.7	27871.4	0.0183412	0.000671762	0.00240264	0.000684358
75	2	6.64789e-05	0.000153917	0.000162337	0.000154323	27654.9	27689.9	27791.9	27653.5	48160.5	50326.9	43714.1	49638.3	547.681	556.064	515.65	554.215	0.365091	0.890375	0.826703	0.887609	0.941252	0.951972	0.924551	0.948108	1.34441	1.28201	1.80495	1.28322	4.65607e-05	0.000151861	0.000159059	0.00015215	0.000705182	0.00016568	0.00019727	0.000165951	26002.8	26353.6	25727	26191.5	37375.6	35554.7	49411	35710.1	0.0186394	0.00103334	0.00252498	0.000822471
76	2	6.23957e-05	7.89573e-05	8.3027e-05	7.946e-05	26660.7	26677.2	26576.8	26683.4	43187.2	47435.7	40710.4	47527.5	696.839	729	671.987	729.494	0.34763	0.869656	0.799875	0.870156	0.917337	0.938081	0.909953	0.938634	1.60623	1.38517	2.21863	1.38535	4.49832e-05	7.60684e-05	7.93867e-05	7.69927e-05	0.000142959	9.61397e-05	0.000128956	9.5149e-05	24447.7	25018.6	24158.4	25035	43030.5	37004.1	61315.3	36917.1	0.0205945	0.00111715	0.00586541	0.000908646
77	2	0.000197583	0.000247853	0.000241884	0.000214068	17814.9	17808.6	17764.9	17781.8	49519.5	51224.8	45655.5	51069.8	566.415	575.526	533.919	571.916	0.369225	0.899031	0.842094	0.897359	0.947756	0.955482	0.934355	0.954941	1.29522	1.2298	1.72598	1.24069	0.000146302	0.000204986	0.000192546	0.000156093	0.000644158	0.000423076	0.00055085	0.000527317	16915.1	17052.3	16622.2	16997.8	22824.3	21719.5	31137.2	21975	0.0214726	0.00125788	0.00121051	0.00144059
78	2	0.00032951	0.0003221	0.000187923	0.000338218	26030.9	26048	26141.3	26057.8	48486.1	51547.3	48366.4	51973.4	648.646	667.935	644.26	669.274	0.365736	0.900937	0.871844	0.904641	0.943074	0.957052	0.944166	0.958788	1.34005	1.22196	1.41718	1.2021	0.000271254	0.000278036	8.01911e-05	0.000284682	0.000646094	0.000695429	0.00122742	0.000553821	24525.2	24916.4	24714.7	24974	35090	31962.5	36658.5	31400.9	0.0230797	0.00131008	0.00538513	0.00121411
79	2	0.000170882	0.000326006	0.000335686	0.000326486	16060.9	16075.2	16063	16080.5	47919.6	50843.4	47119.4	50411.1	588.934	604.662	580.647	603.857	0.364382	0.895953	0.862781	0.893984	0.940092	0.953806	0.937906	0.951498	1.35604	1.24438	1.44638	1.24904	0.000103803	0.000226004	0.000230776	0.000226028	0.00330813	0.000885672	0.00093138	0.000887838	15113.7	15350.1	15075.3	15323.7	21731.2	19884.9	23130.4	19955.8	0.0201306	0.00042609	0.00639558	0.000373664
80	2	0.000640066	0.00121231	0.00109795	0.00114114	19334.2	19328.7	19447.2	19327.8	48044.8	49928.7	45156.9	49962.9	575.001	583.04	549.171	584.913	0.365124	0.889297	0.836094	0.889391	0.940494	0.949611	0.932594	0.949826	1.34761	1.27826	1.76703	1.27904	0.000296955	0.000892786	0.000695464	0.00081728	0.0103332	0.00406285	0.0048387	0.00459116	18212.8	18389.1	18206.4	18388.6	25735.5	24501.9	33078.2	24495.8	0.0179601	0.00150795	0.0014614	0.00130716
81	2	0.000189769	0.000256556	0.000230126	0.000240246	20492.4	20538.3	20657	20512.9	50459.2	52370.1	47596.8	51744.3	536.227	546.978	517.221	543.522	0.371855	0.905953	0.860281	0.901828	0.952294	0.96097	0.942287	0.958111	1.26806	1.20226	1.514	1.222	0.000143936	0.000238807	0.00018288	0.000209331	0.000730308	0.000406813	0.000517503	0.000443868	19502.2	19758.2	19538.5	19657.2	26041	24604.3	30467	25062.6	0.0211412	0.0010301	0.00160722	0.000928205
82	2	0.000150316	0.000182889	0.000170573	0.000183297	21568.6	21577.9	21595	21567	49706.7	52230.6	47654.4	51871.8	629.511	642.677	612.995	639.67	0.369993	0.906219	0.866172	0.903375	0.948543	0.960019	0.940837	0.958493	1.28574	1.19628	1.44382	1.21077	0.000121135	0.000180764	0.000153683	0.000181071	0.000271051	0.000193267	0.000248943	0.000194363	20468.7	20730.8	20337.9	20683.2	27694.5	25738.1	30985.7	26092.7	0.0226821	0.00110227	0.000682528	0.00136304
83	2	0.000185055	0.000269276	0.00029457	0.000287046	12734.5	12723.1	12760.1	12752.9	47351.6	51013.4	47080.3	50577.8	760.096	789.307	757.242	784.84	0.361921	0.896891	0.860578	0.893984	0.93787	0.95466	0.938341	0.952616	1.39864	1.24095	1.47252	1.25474	0.000133011	0.000252133	0.000288781	0.000282614	0.00068832	0.000342731	0.000338163	0.000310521	11941.6	12139.9	11989.5	12159	17816.9	15851.6	18699.3	15939.9	0.0197992	0.0017409	0.00591528	0.00151431
84	2	0.000215504	0.000259558	0.000271253	0.000275448	27392.6	27375.1	27304.9	27402.3	42948.2	48477	44205.6	49265	562.493	601.095	566.913	606.543	0.344316	0.874047	0.829203	0.881484	0.918367	0.944196	0.927651	0.94736	1.73585	1.38519	1.839	1.33135	0.000165236	0.00022692	0.000211528	0.000244068	0.00102148	0.000597984	0.000533668	0.000484864	25256	25943.5	25404.4	26072.2	46632.1	37271.1	49942.7	35740.5	0.0184074	0.00040007	0.00952687	0.000422718
85	2	4.64234e-05	4.62404e-05	4.59793e-05	4.61584e-05	25982.9	26096.8	26248	26147.3	48104.1	51665.9	47729.8	52761.3	488.168	505.085	483.131	508.714	0.363197	0.902062	0.864844	0.909375	0.942444	0.957535	0.941887	0.962524	1.40678	1.21697	1.47021	1.18385	4.38963e-05	4.43699e-05	4.32537e-05	4.44796e-05	6.32426e-05	5.55576e-05	6.8118e-05	5.4331e-05	24411.1	24957.5	24763.4	25162.5	37517.5	31999.2	38001.4	30955.6	0.0216217	0.00170692	0.00551736	0.00194184
86	2	0.000354542	0.00115189	0.00116594	0.00113175	18808	18784.3	18837.5	18771.2	47296	50690.8	48142.3	50839	619.88	637.062	613.724	639.657	0.361582	0.894078	0.868578	0.896312	0.937736	0.953342	0.943518	0.95369	1.42354	1.25842	1.43464	1.24189	0.000174304	0.000629894	0.000638231	0.000620913	0.035732	0.00461058	0.00489827	0.00473783	17658.4	17928.7	17825	17913.9	25994.3	23508.5	26642.8	23230.2	0.0176122	0.000362299	0.0064123	0.000155282
87	2	0.0002965	0.000965406	0.000982713	0.000966439	18727.6	18769.2	18824.9	18776.2	46467.8	51226.2	49448.1	51189.6	633.517	661.508	646.664	661.21	0.358613	0.898344	0.881266	0.897328	0.934054	0.955696	0.948698	0.955716	1.48049	1.23665	1.34139	1.24432	0.000130324	0.000740772	0.000753242	0.000741574	0.0119094	0.00186747	0.00190926	0.00187	17507.5	17974.6	17925.6	17982.6	27786.6	23039.4	24811.3	23146.9	0.0214229	0.000679075	0.0123274	0.00112496
88	2	0.000517715	0.000864131	0.000957731	0.00088428	25609.8	25733.6	25611.8	25607.3	45683.7	50548.3	46638.4	50383.3	542.847	567.425	548.982	571.198	0.355462	0.892766	0.85275	0.890203	0.930623	0.952714	0.937834	0.952466	1.52226	1.26314	1.5749	1.28907	0.000269912	0.000766692	0.000872464	0.000787529	0.0029947	0.00145393	0.00131289	0.00135292	23808.6	24538.3	23977.3	24362.7	39743.3	32432.8	41146.7	33709	0.0222182	0.000554447	0.0107202	0.000510711
89	2	0.000127981	0.000250291	0.000254869	0.000248533	21702.4	21709.4	21811.8	21764.8	45906	48981.6	47495.6	49992.1	633.988	648.347	628.785	653.049	0.357467	0.88125	0.860531	0.888391	0.930546	0.94546	0.941528	0.950287	1.45078	1.32333	1.50674	1.28902	9.2735e-05	0.000247446	0.000251718	0.000245864	0.00108075	0.0002668	0.000281582	0.000263971	20186.2	20524.6	20592.4	20713.1	31542.2	28780.8	32452	27861.5	0.0213732	0.000269792	0.00999074	0.000206172
90	2	0.0010334	0.00327855	0.00343709	0.00336987	22134.1	21703	21664.8	21804.4	47323.9	53329.8	50025.8	52994.7	412.162	427.456	411.802	428.417	0.356283	0.907828	0.874906	0.903969	0.943133	0.966912	0.955055	0.965958	1.98465	1.2669	1.51238	1.29678	0.000433601	0.00128846	0.0013926	0.00134034	0.45872	0.110427	0.114489	0.108131	21004.4	20992.7	20694.7	21120.7	31311.4	25328.7	30976.4	25598	0.0191862	0.000883075	0.00763889	0.000972215
91	2	0.000243914	0.000345107	0.000326562	0.000344362	30432.4	30449.6	30406.2	30448.6	48074.3	50383.9	45423.4	50643.6	562.459	574.341	548.45	578.995	0.363867	0.8905	0.839719	0.892687	0.941641	0.952379	0.933318	0.953505	1.38222	1.28488	1.74173	1.27463	0.000142023	0.000290692	0.000240346	0.00030082	0.000937398	0.00056591	0.000687542	0.000599222	28649	29007.6	28383.1	29046.4	42255.4	39314.8	54334.8	39059	0.0209755	0.00159359	0.00551749	0.00152869
92	2	0.000249567	0.000323502	0.000370153	0.000342281	28870.4	28900.3	28820.9	28849.8	41809.6	49233.4	46375.2	48948.4	574.086	628.511	606.986	626.444	0.34071	0.881938	0.852047	0.878766	0.912061	0.94701	0.936185	0.946056	1.78965	1.32634	1.61215	1.3535	0.00019057	0.000212651	0.000271324	0.000244323	0.00223155	0.00084988	0.000777952	0.000818252	26313.1	27360	26953.1	27260.2	52065.8	38406.2	47636.7	39410.8	0.0205282	0.00122754	0.0118833	0.00138112
93	2	0.000328058	0.000561352	0.000574564	0.000544902	27479.9	27465.4	27479.9	27483.4	51792.4	54078	51316.6	53989.7	556.628	566.921	551.261	565.266	0.376074	0.918438	0.89425	0.917781	0.958236	0.968352	0.957441	0.967955	1.21762	1.14485	1.28117	1.14692	0.000202007	0.000465799	0.000496726	0.000447056	0.00250197	0.00109552	0.00120111	0.00116406	26339.4	26600.9	26323.3	26617.8	33342.9	31418.9	35117.5	31428.4	0.0190039	0.00054847	0.00482185	0.000638723
94	2	0.000326818	0.000494336	0.000517385	0.000476311	19411.3	19350.9	19232	19353.2	47406.6	50831.2	46486.5	50875.4	556.888	570.313	541.708	573.553	0.361543	0.894156	0.850031	0.893609	0.93849	0.954245	0.938	0.954738	1.40601	1.26191	1.67873	1.27128	0.000180062	0.0003498	0.000364671	0.000365518	0.00292968	0.00150675	0.00160184	0.00178971	18240.5	18465.6	18011	18478.5	26936	24430.5	33717.7	24626.4	0.0200974	0.00061675	0.00460603	0.000411327
95	2	9.93802e-05	9.63657e-05	9.7975e-05	9.60893e-05	29902.2	30093.3	30086.1	30128.4	45643.7	51029.3	48553.6	51474.6	472.878	502.84	490.21	504.4	0.355104	0.897	0.871469	0.900078	0.930432	0.95476	0.945986	0.956833	1.50539	1.24164	1.5149	1.22878	9.65281e-05	9.45963e-05	9.57855e-05	9.43411e-05	0.000118021	0.000105539	0.000116948	0.000105018	27686.9	28661.5	28406.1	28778.4	46709.7	37830.3	46691.8	37333.9	0.0272384	0.000298408	0.0161897	0.000280987
96	2	0.00052531	0.000690465	0.000769597	0.000670098	19089	19067.4	19171.4	19091.4	47070.9	49868	44451.2	50397.4	571.272	587.08	546.498	589.707	0.360553	0.886766	0.831313	0.890656	0.936982	0.949943	0.928736	0.952423	1.44949	1.30069	1.77464	1.28501	0.000345116	0.000604513	0.000680161	0.000594485	0.00178213	0.00123869	0.00115869	0.00137324	17942.1	18163.8	17912.3	18245	27366	24566	33149.8	24180.5	0.0217874	0.000304901	0.000283605	0.000299765
97	2	0.000312824	0.000422998	0.000417028	0.000441283	32649.2	32618.2	32634	32648.7	45052.1	49993.8	47093.6	49813.3	573.835	602.632	580.733	600.917	0.354056	0.890328	0.863437	0.888703	0.926796	0.949738	0.93764	0.948996	1.52323	1.26962	1.44629	1.27985	0.000235361	0.000408137	0.000398809	0.000439556	0.000919131	0.000484578	0.000576424	0.000450589	30270.7	30962.8	30627.1	30977	49962.7	41891.6	47953.4	42074.1	0.0197661	0.000365681	0.0108855	0.000131369
98	2	0.000471214	0.00101607	0.00103406	0.00106551	17201.6	17239.7	17291.2	17225.8	47685.9	51139.3	47967	51526.7	545.163	563.553	537.912	566.175	0.361738	0.896984	0.864047	0.899422	0.940456	0.955459	0.943774	0.95732	1.42343	1.24469	1.48491	1.2343	0.000235943	0.000727465	0.000694503	0.000791991	0.00959036	0.00275829	0.00273325	0.00247261	16175.1	16492.3	16358.8	16502.3	24556.5	21382.7	25255.9	21240.5	0.0163033	0.000495389	0.00806963	0.000567695
99	2	0.0013917	0.00258661	0.00253041	0.00281432	11606.4	11631.4	11650.2	11618.4	49853.7	52846.8	49685.5	52670.1	504.045	514.759	495.015	514.367	0.369023	0.908094	0.877922	0.906953	0.950508	0.963558	0.951577	0.962719	1.36784	1.20809	1.41979	1.20985	0.000411792	0.00107434	0.000952015	0.00112224	0.0952721	0.0420266	0.042168	0.0371815	11044.7	11247.7	11129.2	11220.2	14916.7	13505.6	15915.6	13605.4	0.0227152	0.000803471	0.00803593	0.000872054
100	2	0.00217502	0.00331303	0.00285666	0.0036212	17688.6	17683.7	17580.3	17685.4	53593.6	55142.2	52404.4	55166.6	361.699	366.48	359.039	366.21	0.379492	0.922391	0.899766	0.923141	0.967666	0.973853	0.96312	0.973759	1.23661	1.14797	1.2836	1.13722	0.000671254	0.00127665	0.00103612	0.0014458	0.0772915	0.0382107	0.0469929	0.0309566	17134.2	17247	16913.9	17256.2	20764	19770.3	22667.5	19701.8	0.0208264	0.000832727	0.00231963	0.000491477
101	2	0.000226974	0.000237823	0.000247735	0.000240278	18958.1	18971.7	19121.4	18978.4	48932.1	52514.5	48465.6	52338.3	589.746	604.991	574.952	607.631	0.367858	0.907422	0.867141	0.905797	0.944679	0.961496	0.946416	0.960804	1.30641	1.19397	1.47954	1.20236	0.000209874	0.000233632	0.000243939	0.000237659	0.000300483	0.000256967	0.000280106	0.000253589	17917.9	18262	18197.4	18259	24707.6	22566.9	27469.7	22706.2	0.0201803	0.000870222	0.00851672	0.00113506
102	2	0.000711805	0.000942333	0.000714632	0.00114533	20183.3	20362.2	20371.3	20363.4	47219	51689.4	49683.2	52457.4	495.64	517.694	506.715	523.22	0.358815	0.899875	0.879094	0.905234	0.939507	0.958312	0.951294	0.961788	1.50611	1.24055	1.41367	1.21698	0.000254908	0.000383261	0.000276979	0.000605957	0.0133669	0.00656929	0.0115311	0.00500846	18882.4	19522	19398	19594.5	31388.6	25278.4	28793.3	24791.3	0.0232951	0.00137799	0.00709405	0.00111375
103	2	0.000511489	0.00106009	0.00101945	0.00104365	17521.8	17521.1	17564.1	17562	46062.6	50071.3	47282.8	49681.6	683.806	709.298	678.731	706.662	0.35776	0.889391	0.860719	0.886109	0.93146	0.950539	0.939857	0.948846	1.44857	1.28255	1.49345	1.29996	0.000208561	0.000836277	0.000801941	0.000793085	0.006825	0.00278305	0.00372401	0.00279934	16346.8	16694	16568	16723.1	25045.4	22236.8	25738.4	22403.9	0.0207105	0.000974165	0.011252	0.000853061
104	2	0.000132713	0.000499095	0.0005324	0.00049938	34193.9	34057	33339.9	34078.7	46945.2	52574.1	46880.4	52429.7	430.645	453.893	432.99	453.056	0.357949	0.905	0.845703	0.904578	0.938073	0.962556	0.942829	0.9617	1.52693	1.2192	1.92299	1.21593	5.38695e-05	0.000143449	0.000151418	0.000143591	0.0307437	0.0049093	0.00526745	0.00491132	32131.5	32795.7	31278.8	32808.7	50286.4	41397.2	73925.7	41253.6	0.0216051	0.00244515	0.00922859	0.00239137
105	2	0.000161677	0.000228598	0.000233041	0.000228605	17088.4	17071.3	16960.6	17053.6	46350.4	51068.8	48616.3	51130.1	543.732	565.223	551.397	566.049	0.357962	0.896047	0.874047	0.896906	0.933474	0.955312	0.945104	0.955442	1.4558	1.25419	1.39034	1.24605	0.000112564	0.000225106	0.000228965	0.000225179	0.000454418	0.000248996	0.000260147	0.000247597	15994.8	16343.1	16026	16321.3	24491.7	21122.2	24109.3	21064.3	0.0214063	0.000779846	0.0138682	0.000908177
106	2	0.00165312	0.00282698	0.00242309	0.00221243	19902.1	19810.1	19983.2	19922	47304.5	53093.8	50970.4	52034.9	339.59	360.11	347.275	352.943	0.356895	0.906094	0.885469	0.897875	0.941736	0.965748	0.958198	0.961392	1.60999	1.23932	1.41479	1.31098	0.000706496	0.00191314	0.0012095	0.000910757	0.0405092	0.0177385	0.0200101	0.0197727	18758.9	19131	19234.5	19205.6	31157.7	24677.5	27654.7	25806.2	0.0226821	0.00269141	0.0162043	0.00267579
107	2	0.00033751	0.00057218	0.000506735	0.000484519	14473.6	14562.2	14595.1	14597.5	47597.5	52832.4	51782.5	52974.6	460.216	480.975	476.053	481.653	0.361895	0.909578	0.900031	0.910297	0.939687	0.9629	0.958821	0.963606	1.41231	1.18328	1.23784	1.18135	0.000184549	0.00045789	0.000348732	0.000325963	0.00292933	0.0012611	0.00145464	0.00150349	13536.2	13993.5	13988	14063.6	21131	17394.6	18111.9	17290	0.0221353	0.000767547	0.0153756	0.000382833
108	2	0.000497177	0.000849452	0.000946358	0.000950247	19976.8	20051	20084.9	20032.2	50232.7	53016.8	49787	53184.6	388.922	398.32	385.114	398.753	0.370729	0.909969	0.880344	0.910969	0.951681	0.963996	0.951379	0.964771	1.30493	1.18689	1.37468	1.1827	0.000208114	0.000649709	0.000779683	0.000771527	0.00484094	0.00245935	0.00234006	0.00201311	18961.4	19319	19114.3	19306.2	26576.9	23908.1	27658	23885.1	0.0194181	0.000206884	0.00135901	0.000263058
109	2	0.00032143	0.000644294	0.000619814	0.000601991	13386	13423.2	13469.3	13416.8	46899.9	51048.7	49358.5	51657.2	631.189	653.243	637.224	659.385	0.359173	0.895531	0.877375	0.900734	0.936714	0.95534	0.949355	0.957821	1.45781	1.2622	1.38966	1.22768	0.000149668	0.000449754	0.000403094	0.000402178	0.00610888	0.00216906	0.00229475	0.0023362	12544.3	12852.7	12849.9	12881.8	19378.8	16699.2	18306.3	16296.6	0.0196832	0.000508306	0.0123611	0.000412143
110	2	0.000401046	0.000497802	0.000456778	0.000496661	19462.1	19506.1	19533	19481	49471.6	51865.7	49408	52335.4	543.867	553.992	533.803	556.4	0.368398	0.902953	0.877656	0.905422	0.948036	0.958562	0.949644	0.96091	1.31474	1.21418	1.39181	1.20696	0.000249516	0.000367892	0.000307377	0.000377828	0.00208148	0.00144557	0.0017452	0.00147584	18450.4	18719.1	18586.8	18720.1	25751.4	23627.1	27023.1	23521	0.0184903	0.000471461	0.00675229	0.000828134
111	2	0.000216385	0.000229743	0.000233632	0.000213028	16933.9	16961.4	17001.1	16965.8	48425.3	52166.1	49850	51646.3	555.02	569.855	554.3	567.445	0.365592	0.904594	0.881922	0.901234	0.942772	0.960031	0.951326	0.957597	1.34342	1.20807	1.36545	1.22214	0.000198411	0.000226647	0.000229768	0.000196781	0.000296987	0.000245629	0.000260913	0.000281865	15979.6	16319.4	16238.8	16283.5	22647.5	20302.4	22979.1	20520.1	0.0205945	0.000197414	0.0107933	0.000172207
112	2	0.000330829	0.000446169	0.000351987	0.000340015	39831.5	39817.2	39765.1	39872.8	53647.5	55083.1	47388.2	55234.7	336.062	339.13	308.6	339.503	0.381048	0.924063	0.854422	0.924906	0.966732	0.972972	0.94325	0.973675	1.16684	1.12452	1.67229	1.12201	0.000171776	0.000302389	0.000231282	0.000216563	0.00165637	0.00109707	0.0020442	0.00178079	38536.5	38763.4	37503.3	38874.6	46312	44677.6	67298.2	44411.1	0.0248857	0.00351089	0.0067781	0.00334521
113	2	0.00111298	0.00157637	0.00122458	0.00172095	23001.1	23019	22756.2	23002.7	49830	52524.9	47690.4	52016.5	431.108	442.882	422.163	440.933	0.36849	0.904875	0.856766	0.901469	0.950553	0.962373	0.944814	0.960026	1.34173	1.22444	1.74472	1.23736	0.000789815	0.00124345	0.000810292	0.00137036	0.0126102	0.00588847	0.00984985	0.00483625	21865.5	22170.8	21442.6	22089.3	30716.8	28091.1	42412.3	28422.7	0.0221685	0.000798891	0.00367833	0.000721255
114	2	0.00060534	0.00136117	0.00134147	0.00129605	16401.9	16394.4	16411.6	16409.3	49606.1	53075.9	49718.1	52528.4	414.658	425.72	410.989	424.893	0.368704	0.909563	0.874875	0.906344	0.948752	0.964449	0.952817	0.961862	1.32591	1.19127	1.49075	1.20339	0.000265919	0.000868838	0.000751699	0.000795412	0.0287556	0.00691331	0.00717464	0.00731988	15608.4	15864.6	15719.4	15846.5	21039.3	19183.8	25098.8	19343.7	0.0210915	0.00151018	0.00679305	0.00132857
115	2	5.58731e-05	7.51499e-05	7.78519e-05	7.48058e-05	37314.8	37377.6	37461.1	37406.4	47408.4	50724.3	45587.3	51365	613.048	631.722	591.355	636.884	0.361478	0.893125	0.843063	0.898641	0.938581	0.953901	0.933401	0.956535	1.40789	1.2718	1.67322	1.23982	3.94462e-05	7.38292e-05	7.59229e-05	7.35256e-05	0.000132197	8.28377e-05	9.7393e-05	8.17802e-05	34975.7	35648.7	34991.2	35796.6	52863.3	47577.7	62055	46335.5	0.0191365	0.000738307	0.00133794	0.000876761
116	2	0.000390119	0.000777972	0.000743894	0.0007575	19827.6	19833.7	19899.9	19881.6	45671.1	50449.9	48155.7	50964.7	593.425	620.77	605.357	624.685	0.356081	0.892813	0.869234	0.897	0.929906	0.952082	0.943347	0.954302	1.48177	1.26104	1.42176	1.23864	0.000140716	0.000546798	0.000498835	0.000525372	0.00473244	0.00186186	0.00213503	0.00192142	18445.1	18894.2	18813.7	19012.2	29428.2	25023.9	27977.4	24446.8	0.0233117	0.000869604	0.0132713	0.000971652
117	2	0.000242668	0.000580473	0.000591165	0.000597653	23229.2	23257.4	23260.3	23264.8	48907	52729	50513.7	52722.7	525.955	543.717	531.324	543.861	0.36735	0.909438	0.891422	0.909375	0.944867	0.962312	0.952925	0.962284	1.31973	1.18253	1.27703	1.18275	0.000124514	0.000403886	0.000410533	0.000423407	0.00635508	0.00151741	0.00155156	0.00144886	21927.7	22372.9	22163.4	22386.4	30778.4	27539.4	29750.7	27539.3	0.0212903	0.000623765	0.0118307	0.000589199
118	2	0.000252293	0.000280588	0.000340063	0.000297903	23048.2	23189.1	23303.9	23194.8	49430.9	52839.3	49847.3	52787.8	453.748	465.921	451.909	466.48	0.368262	0.910156	0.883687	0.909219	0.947947	0.962821	0.950677	0.962764	1.32601	1.17995	1.33079	1.18739	0.000190467	0.000211915	0.000297523	0.000231475	0.00093932	0.000633058	0.000517915	0.000565534	21753.8	22287.4	22174.5	22301.5	31547.2	27564.6	30681.6	27763.5	0.0231791	0.000813687	0.00513686	0.00109729
119	2	0.000112791	0.000145594	0.000146674	0.000149015	30432	30346.4	30338.5	30335.1	43636.7	53163.5	52187.9	52552.6	529.584	587.032	580.769	581.3	0.347083	0.912172	0.904953	0.907188	0.921585	0.964314	0.960094	0.961855	1.67032	1.17135	1.20631	1.20034	8.6796e-05	0.000142092	0.000143153	0.000147523	0.000315403	0.00016078	0.000162564	0.000156807	28084.3	29283.3	29141.5	29188.2	50010.8	35425.5	36500.2	36323.6	0.0427132	0.00229819	0.0386548	0.00228786
120	2	0.00061803	0.000954936	0.000842166	0.000833586	24158.5	24256.2	23667.6	24229.9	46044.6	51504.1	46613.8	51385.2	471.719	500.49	483.202	501.279	0.355605	0.898203	0.848469	0.896531	0.933548	0.957654	0.93941	0.957347	1.56636	1.25514	1.70881	1.27097	0.000199072	0.0005159	0.000561466	0.000532876	0.0265861	0.0159971	0.0300241	0.0243949	22540.7	23263.1	22068.3	23209.7	37848.5	29995.5	45736.5	30261.5	0.0207105	0.000933267	0.00367833	0.000638931
121	2	0.000854028	0.00141257	0.00130522	0.00146981	22400.7	22448.5	22479.5	22415.9	47707.4	51214.6	49006.1	50534.4	443.973	457.547	441.842	454.704	0.362552	0.896109	0.871641	0.891891	0.940028	0.956255	0.948791	0.952931	1.40921	1.25905	1.45057	1.27443	0.000297693	0.000877897	0.000871609	0.000883761	0.0247673	0.0161149	0.0224645	0.0144085	21078.5	21530.3	21387.9	21400.7	30942.8	27627.2	31494.5	28075.8	0.0186394	0.00083426	0.0101421	0.00106485
122	2	0.000280579	0.000377243	0.000389943	0.000361091	23861.6	23901.5	23951.7	23868.4	47775.4	51752.3	48481.9	51316.3	532.142	548.436	524.348	547.495	0.363822	0.901687	0.868031	0.898453	0.93944	0.958168	0.946152	0.956212	1.36081	1.22156	1.46431	1.23654	0.000203653	0.000358808	0.000346683	0.000329515	0.000996824	0.000648625	0.000575764	0.00068623	22433.4	22950.9	22717.5	22849.2	32281.3	28890.5	34280.1	29318.7	0.0189873	0.000318933	0.00705843	0.000340138
123	2	0.00026348	0.000595959	0.000619639	0.000651189	24679.6	24862.9	24844.5	24783.8	44155.5	51402.1	50236.6	50802.4	559.346	603.163	595.763	600.864	0.348125	0.898141	0.888484	0.893906	0.92493	0.956891	0.951972	0.954128	1.69285	1.24375	1.3026	1.26349	0.000109756	0.000424323	0.000459186	0.000518051	0.00472503	0.00128563	0.00126616	0.0011869	22757	23806.6	23659.9	23623.1	42934.8	30826.2	32350.1	31602.6	0.0249354	0.00071043	0.0197503	0.000797938
124	2	0.000288591	0.000594386	0.000595925	0.00057799	23383.6	23398.1	23240.1	23458.9	50225.2	53069.9	50392.9	53667.8	414.889	424.589	413.046	426.1	0.370436	0.909937	0.884156	0.913953	0.951751	0.964339	0.954575	0.967017	1.29538	1.18933	1.42063	1.17313	0.000132967	0.000356	0.000362521	0.000352732	0.00650777	0.00243528	0.00264946	0.00255468	22214.5	22527.1	22122.5	22686.6	30825.2	28259.2	35106.8	27757.5	0.0197992	0.00025363	0.0107033	0.000114384
125	2	0.00211268	0.00279013	0.00165395	0.00247566	17511.4	17521.9	17484.3	17480.6	51941	53837.6	50353.3	53666.2	368.553	373.729	361.997	373.229	0.375111	0.913531	0.880625	0.911891	0.96013	0.96832	0.955568	0.967777	1.28639	1.19396	1.4774	1.21297	0.000526964	0.000788173	0.000585099	0.000743601	0.0914183	0.0575438	0.140804	0.069938	16844.5	17021.4	16715.1	16942.8	20886.2	19834.7	23475.3	20089.9	0.019501	0.000401318	0.00235323	0.000574733
126	2	0.000294086	0.00112848	0.00117959	0.00118241	29995	30026.6	29875.5	30025.2	44390.8	50546.6	48087.4	50584.5	563.95	597.465	577.772	595.436	0.350495	0.892312	0.864766	0.891016	0.924497	0.952916	0.944683	0.953565	1.59072	1.27205	1.54359	1.28786	0.000115486	0.000823204	0.00086544	0.000894541	0.0225992	0.00281925	0.00284718	0.00264904	27692.9	28612.2	28198.5	28627.9	47557.1	38409.4	48362.8	38864.3	0.0205779	0.00145732	0.0143984	0.00132417
127	2	0.000171318	0.000185445	0.000172175	0.000185879	25777.8	25808.1	25838.8	25795.2	49788	52699.1	49499.1	52408.3	496.974	510.483	495.033	508.267	0.369746	0.909047	0.879016	0.906344	0.949306	0.962228	0.949904	0.961102	1.29727	1.18527	1.39663	1.19988	0.000155809	0.000183705	0.000156424	0.000184094	0.000237334	0.000193866	0.000244841	0.000194884	24458.7	24840.9	24576	24790.2	33547.9	30577.1	36047	30985.6	0.0196169	0.000502991	0.0066113	0.000466969
128	2	0.00175672	0.00214838	0.00138462	0.00192056	16234.8	16204.7	16335.8	16239.6	51445.3	53853.8	51178.5	53586.3	413.343	423.213	408.934	421.122	0.373678	0.914906	0.887	0.912531	0.957639	0.967911	0.958978	0.966901	1.26418	1.16907	1.3861	1.1839	0.000707473	0.000994715	0.000625979	0.000860952	0.0240773	0.01786	0.0406014	0.0217975	15581.8	15711.6	15745.4	15747.2	19990.6	18635.5	21327.1	18730.4	0.0198489	0.000258624	0.00642989	0.000252548
129	2	3.78384e-05	3.77766e-05	3.77523e-05	3.78233e-05	29044.5	29062.2	29092.5	29027.5	45728	49774.3	46832.2	50268.1	676.598	705.713	679.926	706.645	0.356204	0.887406	0.856891	0.890484	0.930256	0.949144	0.937934	0.9516	1.48243	1.29394	1.54195	1.2814	3.51843e-05	3.58032e-05	3.53353e-05	3.59721e-05	5.60248e-05	4.90999e-05	5.84279e-05	4.85054e-05	27071.2	27654.6	27374	27667.6	42653.2	37177.8	44245.7	36899.6	0.0205116	0.00032926	0.00949542	0.000335103
130	2	0.00206611	0.00325924	0.00282621	0.00314924	23098.8	23037.9	23070.9	23028.5	55102.8	57206.2	54611.1	57171	318.595	323.089	315.007	322.98	0.384408	0.936266	0.914172	0.935891	0.973551	0.982356	0.973169	0.982279	1.14184	1.08096	1.28617	1.08433	0.000935434	0.00212735	0.00161756	0.00202389	0.0217536	0.011445	0.0153887	0.0126071	22557.7	22682.4	22481.5	22663.9	25665.8	24597.6	28101.1	24682.1	0.0289118	0.000791019	0.0132065	0.00110334
131	2	0.000205026	0.000372916	0.000346272	0.000356007	27150.6	27192.5	27173.4	27157.4	50355.8	53128.6	50405.6	52965.3	608.598	621.73	605.329	621.594	0.371712	0.911406	0.888734	0.910734	0.951706	0.964311	0.953088	0.963439	1.2674	1.17792	1.30902	1.17759	7.5446e-05	0.000238095	0.00021664	0.000230696	0.00214231	0.00106601	0.00134327	0.00120396	25835.5	26247.6	25911	26167.5	34404.5	31878	35473.7	31960.3	0.0214063	0.00031265	0.0074889	0.000665197
132	2	8.30915e-05	0.000166995	0.000168417	0.000167362	24606.2	24621	24599.1	24583.3	47661.5	53081.1	51654.8	52736.7	743.678	780.545	769.994	777.737	0.362923	0.912031	0.902094	0.91	0.939304	0.96383	0.957439	0.962209	1.38179	1.17009	1.21571	1.17795	4.96946e-05	0.000165375	0.000166558	0.000165732	0.000584233	0.000174579	0.000177778	0.000174984	23118	23746	23552.9	23642.9	33979	28737.2	29913.7	29017.4	0.0292432	0.000118442	0.0225663	0.000452803
133	3	0.00167491	0.00178143	0.00124328	0.00192154	15226.4	15272.3	15363.1	15228	50522.3	52433.3	45095.7	52506.8	481.714	491.062	448.706	491.003	0.372428	0.906453	0.836266	0.907781	0.952309	0.961228	0.931849	0.961346	1.25486	1.19918	1.72359	1.1903	0.00106748	0.00129864	0.000638401	0.00145817	0.0069358	0.00664823	0.0124271	0.00593916	14526.8	14736.9	14406.3	14669.1	18952.6	17988.9	25346.1	17977.4	0.0215223	0.00100254	0.00490561	0.00130592
134	3	6.08689e-05	7.79057e-05	8.02768e-05	7.79022e-05	27030.3	27033.6	27072.3	27037.8	51101.7	52465.7	46510.3	52422.4	525.739	530.157	490.716	530.046	0.374557	0.908875	0.851844	0.907953	0.954708	0.960804	0.937044	0.960772	1.22749	1.18006	1.56088	1.1867	4.58615e-05	7.6227e-05	7.75471e-05	7.61777e-05	0.0001229	8.56209e-05	0.000103857	8.59549e-05	25802.6	25970.2	25392.3	25986.6	33180.6	31887.3	42101.5	32098	0.0258466	0.00115478	0.00696258	0.00112204
135	3	7.99453e-05	9.16088e-05	9.30723e-05	9.1551e-05	22708	22726.9	22864.3	22904.3	42106.8	48359.8	44029.1	48081.7	578.031	623.81	587.545	620.29	0.343249	0.875062	0.822937	0.871891	0.912231	0.942986	0.928638	0.941937	1.69565	1.36376	1.97486	1.3827	6.44567e-05	8.84987e-05	8.86872e-05	8.82462e-05	0.000158168	0.000111396	0.000148746	0.000112871	20701.3	21414.5	21320.9	21654.5	39834.7	31679.6	45945.5	31451.8	0.0216051	0.00187644	0.0046226	0.00184746
136	3	0.000152268	0.000255017	0.000273543	0.000255895	22664.7	22621.9	22576.5	22598.6	49077.9	51278.2	43963.4	50596.2	551.918	562.679	509.507	559.746	0.368659	0.899312	0.824797	0.895281	0.945126	0.955749	0.927242	0.952393	1.29223	1.22868	1.88399	1.24427	9.12541e-05	0.000252537	0.000269654	0.000253194	0.00055707	0.000267584	0.000317793	0.000269315	21438.3	21610.9	20922.5	21497.6	29243.9	27923.4	43882	28333.9	0.0257969	0.00297768	0.00770457	0.00312253
137	3	3.89922e-05	3.91318e-05	3.893e-05	3.9197e-05	27308.8	27274	27425.1	27222.5	43336.7	45194.5	37463.4	45913.7	788.623	787.851	707.864	797.569	0.347982	0.854469	0.768078	0.858703	0.918114	0.926145	0.892352	0.930275	1.59439	1.4486	2.28037	1.43556	3.57029e-05	3.62448e-05	3.45898e-05	3.65088e-05	6.26206e-05	5.66394e-05	8.94785e-05	5.59294e-05	25131.3	25292.5	24611.3	25322.3	43186	39272.9	61511.3	39060.8	0.0204619	0.00514981	0.00253691	0.00504962
138	3	4.18241e-05	4.18475e-05	4.19824e-05	4.18195e-05	27722.6	27736.5	27740.9	27730.3	48165	50311.9	46019.3	51197.2	607.775	617.579	580.987	621.635	0.366003	0.893188	0.846688	0.898531	0.940658	0.951053	0.935316	0.955422	1.32346	1.25345	1.63401	1.2325	3.93947e-05	3.9879e-05	3.93525e-05	4.001e-05	5.48997e-05	5.19554e-05	6.64153e-05	5.11377e-05	26075.3	26389.9	25977.8	26500.9	36664	34727.7	45709.3	34152.1	0.0227815	0.000465692	0.000672806	0.000342761
139	3	0.000391435	0.000661129	0.000724344	0.000798378	27509.1	27511.6	27616.1	27483.2	48545.4	51360.4	47696	52107.3	580.062	591.78	559.38	594.903	0.367428	0.900422	0.863187	0.905141	0.942336	0.956012	0.941983	0.959523	1.30957	1.22273	1.47397	1.20199	0.000189994	0.000324309	0.000386218	0.000455071	0.0149919	0.00610891	0.00616286	0.00472524	25962.4	26354.9	26119.5	26410.7	35374	33221.8	39723.4	32770.3	0.0258135	0.00138838	0.00263484	0.00125286
140	3	0.000240142	0.000393519	0.000386866	0.000356798	20408.8	20442.8	20175.4	20441.8	49956.2	51972.1	44669.2	51480.3	447.064	454.165	424.367	451.588	0.370924	0.903656	0.831203	0.900297	0.949548	0.95902	0.930831	0.956772	1.27118	1.2096	1.91432	1.22494	0.000140623	0.00028543	0.000252458	0.000230299	0.00196887	0.000828867	0.00104024	0.000943206	19366.4	19617.3	18768.1	19566.1	26012.7	24677	44454.9	24979.8	0.0221188	0.00177346	0.0023859	0.00167206
141	3	9.38997e-05	0.000126451	0.000116632	0.000127222	39984.6	39902.4	38915.8	39882.4	48941.3	52657.4	45665.2	51638.5	429.534	444.77	418.216	440.317	0.367428	0.9075	0.836547	0.899969	0.945016	0.962376	0.936484	0.957897	1.31538	1.19728	1.8839	1.23407	4.65177e-05	8.40828e-05	6.76644e-05	8.43301e-05	0.000564325	0.000374004	0.000493156	0.000378018	37837	38397.8	36189.5	38180.9	52489.2	47993.1	91315.4	49446.4	0.0235271	0.000350227	0.00543442	0.000348003
142	3	0.000319662	0.000417243	0.000386764	0.000417746	29587	29589.4	29343.2	29595.8	51391.6	53635.7	47390.3	53368.4	412.521	423.991	401.28	423.295	0.373405	0.914125	0.859406	0.912047	0.957447	0.966755	0.941135	0.965655	1.26789	1.16898	1.54122	1.18007	0.00014508	0.000301317	0.000244967	0.000290777	0.00207575	0.00172342	0.00202569	0.00169411	28343.2	28626	27552.8	28606	37338.1	34444.4	47337.1	34765.8	0.0280668	0.00338226	0.0104231	0.00332075
143	3	0.000604306	0.00106936	0.00111072	0.00105729	23123.5	23083.7	22007.3	23095	47510.8	49758.8	41172.7	51149.6	502.791	517.613	492.893	524.37	0.360918	0.884734	0.791438	0.895297	0.939704	0.949736	0.917484	0.956052	1.42959	1.31576	2.65056	1.26445	0.000236173	0.000646043	0.000497847	0.000676405	0.0108549	0.00529042	0.00561021	0.00547063	21850.4	22029.2	20033.7	22191.3	32063	29663.3	73054.5	28453.5	0.0216217	0.0042869	0.00175632	0.00420626
144	3	0.00150184	0.00194074	0.0013729	0.0018216	29951.8	29944	29993.5	29931.7	53009.4	53506.9	43499.4	53586.1	485.624	487.596	430.799	487.454	0.379141	0.913656	0.81975	0.913578	0.964041	0.966098	0.925391	0.966667	1.19225	1.16989	1.91545	1.17638	0.000618972	0.000970339	0.000634531	0.000975487	0.0200571	0.0140915	0.0317872	0.0169997	28874	28938.5	27764.7	28927.1	35224	34751.6	56389.1	34886.1	0.0352906	0.00490572	0.0250351	0.00492743
145	3	0.00026646	0.000261784	0.000243034	0.000350775	19607.5	19667.4	19562.2	19643.1	49387.1	51581.8	41754.6	50972.9	576.027	585.463	523.823	582.421	0.368861	0.9015	0.806391	0.896531	0.947177	0.9571	0.916071	0.95454	1.30342	1.21738	2.08665	1.24549	0.000119775	0.000142992	0.00010713	0.00016909	0.00314361	0.00332797	0.00434706	0.00205652	18541.5	18836.1	17927.2	18747.5	25656.1	23824.5	43554.6	24454.8	0.0209755	0.00101257	0.00838523	0.00106926
146	3	0.000506385	0.00101263	0.000772739	0.000743899	35164	35097.5	34869.3	35137.4	52088.9	53831.1	48311.6	53633.5	273.941	277.71	263.834	277.853	0.375951	0.914937	0.862703	0.913125	0.960253	0.967731	0.946978	0.967009	1.23766	1.16699	1.57593	1.18012	0.000181666	0.000522145	0.000390092	0.000389261	0.022626	0.00878504	0.0155877	0.014683	33787.7	33965.7	32934.5	33994.4	42734.6	40873.5	56798.8	41046.3	0.0175625	0.00184041	0.000933139	0.00181749
147	3	8.7759e-05	8.77513e-05	8.74724e-05	8.77483e-05	15664.5	15697.8	15846.4	15701	47554.3	49720.7	45658.7	50679.2	546.65	557.427	523.517	564.118	0.363535	0.888266	0.837187	0.894797	0.938108	0.948463	0.936099	0.95307	1.36206	1.27914	1.87779	1.25147	8.24122e-05	8.32359e-05	8.14934e-05	8.36631e-05	0.000119197	0.000111661	0.000154868	0.000109404	14707.3	14917.4	14987	14989.9	21338.8	19931.2	31514.2	19462.4	0.0222347	0.000599506	0.000252362	0.000665779
148	3	0.000365591	0.000602661	0.000533447	0.000637289	26839.6	26828.1	26845.6	26814.7	51640.5	53334	46711	53166.7	552.647	559.388	514.706	560.472	0.375937	0.913172	0.851078	0.912469	0.957349	0.965126	0.938905	0.964275	1.2163	1.16828	1.59838	1.1698	0.000129474	0.000318953	0.00028342	0.000353705	0.00948819	0.0060169	0.00808536	0.00567919	25723.4	25922.3	25257.1	25879.2	32254.6	31091.6	42715.5	31179	0.0265425	0.00050964	0.0100409	0.000454901
149	3	0.00017741	0.000348457	0.000368779	0.000383827	21258.6	21289.5	21317.4	21282.6	50765.8	52026.6	45712.7	51598.8	630.277	635.473	586.907	635.472	0.373444	0.904906	0.847828	0.903094	0.953302	0.959061	0.932392	0.956834	1.24684	1.20137	1.5689	1.20634	7.54921e-05	0.000152871	0.000158875	0.000164199	0.0110509	0.00438418	0.00469268	0.00397672	20245.2	20423.9	19892.6	20369.2	26379.5	25477.2	33145.5	25623.4	0.0300219	0.000567027	0.0139562	0.00090639
150	3	0.000138209	0.00015382	0.000142647	0.000119672	24390.5	24414.7	24312.5	24408.1	49574.9	51872	46415	51305.1	522.717	534.078	496.069	529.325	0.36972	0.903016	0.846516	0.898891	0.947825	0.958561	0.93847	0.956072	1.28782	1.21295	1.69858	1.23569	0.000122473	0.000151742	0.000125726	0.000102093	0.000204935	0.000164633	0.000229037	0.000270106	23111.2	23412	22824.1	23339.1	31416.7	29526.3	42695.5	30090.7	0.0241235	0.00351666	0.00768779	0.00360906
151	3	0.000226474	0.000292019	0.000334376	0.000292462	24263.5	24284.2	24266.9	24248.3	51906.6	53881.8	50744	53703.6	559.233	567.435	550.656	565.376	0.376634	0.917156	0.89075	0.915797	0.958585	0.967455	0.95467	0.966719	1.20731	1.14914	1.29659	1.15593	0.000140167	0.000213729	0.000279525	0.000214077	0.000962646	0.000606114	0.000559274	0.000607078	23265.3	23517.6	23174.9	23440	29225.6	27787.2	31350.3	28032.8	0.0205448	0.00123947	0.000230771	0.00106238
152	3	0.000593881	0.000706136	0.000666182	0.000792312	26773.3	26799.3	26780.4	26769.3	55675.6	55987.2	51055.1	56497.5	406.788	407.052	389.72	409.569	0.386725	0.930047	0.890109	0.933109	0.975498	0.97684	0.956998	0.979071	1.10799	1.10005	1.32136	1.08887	0.000414125	0.000570778	0.000539106	0.000703292	0.00176225	0.00139724	0.00252278	0.00114866	26090.7	26172.7	25620.3	26180.6	29757.5	29495.1	35591.4	29253.8	0.0335509	0.00221094	0.021474	0.00209148
153	3	0.00250707	0.00337371	0.00240354	0.00322268	24491.3	24522.3	24329.3	24433.7	54974.9	55680.3	49256.4	55476.9	279.361	280.281	259.925	279.825	0.38373	0.926594	0.869672	0.924828	0.973326	0.975992	0.951513	0.975247	1.16296	1.12526	1.61483	1.1371	0.000999207	0.00156739	0.00102858	0.00160918	0.0480496	0.0325366	0.0657402	0.0373095	23841.8	23979.7	23103	23809.1	27527.1	26851.6	39270.3	27245	0.0255815	0.00216393	0.0110016	0.00210242
154	3	0.000765632	0.00165896	0.0016018	0.00160741	29636	29737.6	29590.1	29710.8	50187.4	53483.8	48401.6	53260.1	379.778	391.845	371.064	391.742	0.369173	0.911516	0.864922	0.911609	0.952535	0.96651	0.946757	0.965049	1.33526	1.18786	1.51853	1.17872	0.000293545	0.00123507	0.00111557	0.0012109	0.0120113	0.00411874	0.00492897	0.00449488	28220.4	28793.2	27996.9	28702.6	39606.3	34979.1	45499.1	34764	0.0209424	0.000559328	0.00394383	0.000556545
155	3	3.28321e-05	3.28468e-05	3.26006e-05	3.28705e-05	33953.8	33933.5	34211.4	33929.8	49438	51382.8	42751.4	50306.8	559.193	569.091	509.502	562.476	0.37	0.900563	0.814625	0.894297	0.9467	0.956109	0.920964	0.950721	1.27625	1.22194	1.89669	1.24368	3.1061e-05	3.13932e-05	2.98866e-05	3.12507e-05	4.20009e-05	4.01808e-05	6.34868e-05	4.08039e-05	32188.9	32478.5	31659.1	32292.8	43063.2	41294.4	62663.8	42060.7	0.0282656	0.00321625	0.0123935	0.00321432
156	3	0.00127513	0.00177109	0.00119332	0.00150077	26263.7	26258.4	26339.3	26272.8	53523.1	54819.3	51297.7	54718.5	490.086	495.051	478.07	493.787	0.380742	0.922703	0.894078	0.921828	0.966183	0.971761	0.957411	0.971364	1.17038	1.12956	1.28649	1.13382	0.000643392	0.00129591	0.000702483	0.00092202	0.00949098	0.00655331	0.0130677	0.00744259	25375.9	25522.4	25260.1	25531.3	30560.8	29563.5	33302.8	29623.9	0.0239081	0.000440805	0.00341344	0.000549051
157	3	7.60214e-05	0.000110213	0.000113482	0.000110167	28972.5	28982.5	29145.3	29019.9	46503.1	49864.8	46498.8	49879.9	580.104	595.679	562.359	593.351	0.361074	0.889281	0.848562	0.889297	0.932294	0.949161	0.938431	0.949293	1.38205	1.27484	1.64447	1.27762	4.63313e-05	0.000108235	0.00011098	0.00010817	0.000198928	0.000120827	0.00013881	0.000121072	27035.9	27537.2	27476.1	27596.9	39900	36763.7	46943.9	36717.9	0.0219034	0.000830262	0.00449006	0.000741859
158	3	3.24744e-05	3.2408e-05	3.2458e-05	3.24262e-05	35153.8	35174.6	35207	35195.1	51347.9	53408.1	48723.3	53215.7	574.159	585.037	556.471	583.511	0.375234	0.913219	0.873094	0.912594	0.955846	0.965608	0.946276	0.964544	1.21893	1.17212	1.41208	1.16995	3.10652e-05	3.1272e-05	3.07088e-05	3.12674e-05	3.94388e-05	3.80955e-05	4.56277e-05	3.79682e-05	33605.1	33982	33354	33983.8	42775	41059	49388.5	40970.7	0.0178276	0.000835899	0.000762145	0.00106175
159	3	0.000100291	0.000100186	0.000111062	6.6571e-05	42084.7	42050.7	41937	42081.1	55231.6	55597	41763	55205.3	434.296	434.959	376.195	432.678	0.385579	0.927188	0.804703	0.924687	0.973565	0.975257	0.916929	0.973549	1.11963	1.11304	2.15398	1.12281	9.95454e-05	9.95124e-05	0.000108654	4.04897e-05	0.000103611	0.000103219	0.000142511	0.000171297	40954.1	40966.7	38439.5	40952.5	47219.2	47004.2	93911.7	47374.3	0.0480151	0.000655205	0.0390683	0.000256755
160	3	8.11246e-05	0.000115084	0.000117466	0.000115028	26396.6	26379.1	26428.7	26425.3	50667.2	52538.3	49101.1	52529.8	657.775	666.86	642.368	666.569	0.373275	0.907875	0.877578	0.908109	0.952715	0.9615	0.947455	0.961423	1.24168	1.18959	1.37324	1.18915	5.29303e-05	0.000113447	0.000115143	0.000113375	0.000196118	0.000122994	0.000133521	0.000123105	25151.4	25364.9	25072	25432.3	32720.6	31437.5	36142.2	31277.4	0.02023	0.000782207	0.00286709	0.000307803
161	3	0.00100638	0.00142296	0.0015069	0.0014041	28762.7	28831.9	28854.9	28862.1	50583.4	52532.9	48676.6	52695.1	513.516	519.381	488.279	519.48	0.373112	0.908156	0.866859	0.909297	0.952309	0.961395	0.947851	0.962142	1.24582	1.18705	1.48709	1.18319	0.00072308	0.00120282	0.0012268	0.00119677	0.00581479	0.00315141	0.00287839	0.00345657	27340.2	27684.6	27356.3	27749.3	36740.2	34609.4	43436	34418	0.0317118	0.00100195	0.0119464	0.000793023
162	3	0.00032485	0.000461385	0.000390095	0.000495707	29558.2	29616.5	29061.3	29573.8	51601.3	52746.5	44140.8	52905	378.159	381.709	345.823	381.365	0.375163	0.908937	0.826797	0.909922	0.957586	0.962554	0.928022	0.963296	1.23009	1.18779	1.86216	1.18334	9.59817e-05	0.000208766	0.000168266	0.000219472	0.00641591	0.00463184	0.00677545	0.00414493	28223.4	28468.1	26678.4	28420.1	36744.6	35373.4	58720.3	35356.3	0.0262443	0.0016098	0.0141992	0.00145234
163	3	0.00202345	0.00216727	0.000825507	0.00217137	37823.1	37847.7	37931	37790.7	53446.1	54087.8	43452.1	53565.3	317.039	319.681	275.016	318	0.375514	0.906344	0.804125	0.902781	0.970574	0.97293	0.931984	0.9707	1.56109	1.4524	2.9325	1.48458	0.00177301	0.00193199	0.000316582	0.00193185	0.0044047	0.00358294	0.0171822	0.00360671	36615.4	36757.7	35461.6	36579.3	53281.4	50383.8	103462	51497.1	0.0385877	0.00485162	0.0294421	0.00503384
164	3	0.000181849	0.000283802	0.000278918	0.000301	26511.7	26483.3	26130.1	26489.7	52781.2	53717.8	46421.5	53372.7	467.355	470.525	433.287	469.182	0.378457	0.915078	0.843484	0.91375	0.963148	0.967027	0.939752	0.965248	1.2189	1.16401	1.89434	1.16614	0.00010157	0.000172742	0.000152318	0.000202333	0.0021027	0.000957109	0.00116009	0.000924801	25434	25496	24598.8	25461	32528.3	31256.9	76944.8	31298.6	0.0260786	0.00117947	0.0098425	0.00121258
165	3	0.00022192	0.000459627	0.000457505	0.000425604	30787.8	30775.8	30698.4	30814.3	52730.7	53613.1	45930.3	53502.8	533.494	537.146	499.659	537.129	0.378464	0.915063	0.845359	0.914578	0.96272	0.966347	0.935277	0.965801	1.19893	1.15942	1.68741	1.16078	8.62154e-05	0.000161636	0.000128726	0.000122636	0.0104472	0.00394881	0.0044374	0.00408779	29683.1	29791	28743.9	29837.9	36331	35361.4	52680.5	35311.6	0.0308834	0.00201631	0.0139009	0.00199716
166	3	5.27429e-05	5.26707e-05	5.30503e-05	5.2684e-05	23839.4	23796	23749.5	23815.8	46927.5	51254.6	45091.5	50596.9	536.339	565.493	521.28	558.345	0.359785	0.898531	0.839922	0.893563	0.936415	0.955802	0.93067	0.952791	1.4368	1.23445	1.7057	1.25666	4.94582e-05	5.04231e-05	4.95934e-05	5.02657e-05	7.44459e-05	6.44764e-05	8.63093e-05	6.55116e-05	22368	22755.7	22112.1	22724.8	33993.9	29253	41028.8	29778.2	0.024488	0.00229379	0.00181407	0.00216744
167	3	2.76634e-05	2.76232e-05	2.78913e-05	2.76067e-05	39856.2	39894.2	39419.9	39939.9	46782.8	49216.8	38605.1	48698.1	526.344	537.301	478.736	534.509	0.360039	0.882141	0.772219	0.877734	0.935002	0.946787	0.902181	0.944485	1.4138	1.32118	2.66432	1.34512	2.58481e-05	2.61191e-05	2.51977e-05	2.60388e-05	3.90845e-05	3.6681e-05	7.00927e-05	3.74284e-05	37324.7	37845.4	35506.6	37814.1	56016	52183.3	111741	52957.1	0.0219199	0.00438828	0.000647015	0.00452058
168	3	3.07733e-05	3.07752e-05	3.10944e-05	3.07746e-05	39074.7	39029.2	38789.3	39048.9	55148.3	55218.9	42531.1	55850.6	430.775	432.919	375.007	433.848	0.385352	0.925375	0.811359	0.929312	0.973173	0.973471	0.920452	0.976233	1.12012	1.11799	1.95336	1.10276	2.99448e-05	2.99725e-05	2.87149e-05	3.00407e-05	3.44583e-05	3.44434e-05	5.79574e-05	3.39184e-05	38041.1	37960	35618.8	38117.9	43706	43667	78090.1	43088.9	0.0343628	0.00517255	0.0239579	0.00508901
169	3	0.000347318	0.000514841	0.000478438	0.000514328	21707.1	21697.8	21715.3	21678.5	53151.7	54364.8	46904.1	54507.2	453.954	456.265	418.176	458.115	0.379909	0.919641	0.849016	0.920734	0.964347	0.969789	0.941326	0.970346	1.17452	1.14294	1.67525	1.13649	0.000197937	0.00038061	0.000275994	0.000380292	0.00217562	0.00120409	0.00147922	0.00120229	20936.5	21045.3	20495.8	21024.5	25445.8	24821.8	36848.1	24710.5	0.0297568	0.00236028	0.0161873	0.00222917
170	3	0.000361686	0.000601431	0.000613651	0.000616444	23701.9	23675.7	23753.2	23690	52257.5	52640.3	44658.2	53230.8	531.7	531.26	484.358	534.013	0.377513	0.908937	0.833641	0.912391	0.960259	0.961902	0.929402	0.964699	1.19932	1.18487	1.75638	1.17247	0.000146463	0.000394886	0.000344048	0.000401177	0.00338986	0.00196864	0.00213348	0.0018239	22772.5	22775.1	22097.9	22861	28315.1	28067.5	40965.3	27717.7	0.0273378	0.00401978	0.0135712	0.00384231
171	3	0.000382323	0.000445221	0.000362133	0.000461622	21116.6	21158.1	21167.3	21132.3	51517.7	52647.2	44017.3	52039.8	516.175	520.155	461.305	515.598	0.375605	0.908797	0.826281	0.904844	0.956747	0.961964	0.926947	0.959163	1.21821	1.18546	1.805	1.20224	0.000235827	0.000328376	0.000259951	0.000334064	0.00135635	0.00114449	0.00236826	0.00105179	20194.5	20374.3	19639.9	20270.6	25784.9	24997	38030.5	25405.3	0.0309994	0.00190696	0.0165851	0.00216119
172	3	5.7303e-05	5.72661e-05	5.76517e-05	5.72582e-05	21278.5	21301.4	21221.5	21286.1	48524.9	50189.5	39085.7	49932.5	619.529	628.021	540.621	626.087	0.366634	0.891359	0.780031	0.889734	0.942759	0.950756	0.903031	0.949539	1.32284	1.26597	2.34097	1.27612	5.40114e-05	5.4438e-05	5.21507e-05	5.43533e-05	7.52682e-05	7.22607e-05	0.000127661	7.28087e-05	20058.1	20260.5	19183.4	20208.1	28248.4	26949	52362.5	27195.8	0.0233945	0.00281566	0.0104381	0.00286243
173	3	0.00423565	0.00598678	0.00445354	0.00563948	20576.2	20661.2	20462.6	20513.2	52790	53953.3	51725.7	54569.3	309.945	313.367	307.415	315.733	0.376934	0.914797	0.894547	0.91825	0.964212	0.968568	0.960258	0.971517	1.24155	1.17574	1.30918	1.16761	0.00141429	0.00285017	0.0018382	0.00274383	0.0627262	0.0440847	0.0698786	0.0481756	19863.3	20053.5	19611.1	19910	25829.4	24015.1	27441.9	24481.9	0.0225992	0.00132303	0.000538918	0.000952872
174	3	0.000819502	0.00156069	0.00163363	0.0017015	16120.1	16125.9	16136	16111.9	52002.8	52803.3	48450.6	53477.6	472.784	473.971	450.241	476.946	0.376413	0.908312	0.865187	0.913531	0.959376	0.963102	0.947019	0.965928	1.21836	1.19604	1.51965	1.16974	0.000320968	0.00119766	0.00120431	0.00117064	0.0132908	0.00783981	0.00716936	0.00458749	15470.6	15544.1	15315.8	15569.7	19483.4	19166.5	24640.5	18815.7	0.0216548	0.00199072	0.00419297	0.0020366
175	3	0.000501245	0.000872818	0.000821126	0.000853099	20499.2	20539.1	20651.2	20529.5	52780.9	53846.2	49222.3	54342	507.875	510.21	480.217	513.435	0.378646	0.916078	0.874328	0.919188	0.962912	0.967533	0.94948	0.969767	1.19543	1.1581	1.42967	1.14571	0.000252627	0.000657292	0.000539427	0.000591013	0.00606663	0.00315149	0.00360295	0.00297026	19720	19886.6	19686.5	19918.3	24524.7	23696.4	28910.1	23470.8	0.0249685	0.00155882	0.00324778	0.00150199
176	3	0.000347151	0.00039712	0.000479109	0.000432146	24693	24690.9	24723.7	24684.5	51586	52402.8	41456	52250.3	545.305	548.283	482.144	546.896	0.375482	0.906422	0.806297	0.905266	0.957377	0.961111	0.913246	0.960467	1.23692	1.20198	1.93791	1.20921	0.000285931	0.000354145	0.000445829	0.000404478	0.000825981	0.000647587	0.000639497	0.000545	23619.5	23707.4	22595.4	23676.7	30647.3	29807.4	48191.7	29986.6	0.036119	0.00061941	0.0276365	0.000521404
177	3	0.000475975	0.000956557	0.000878199	0.000866336	21695.1	21681.2	21733.4	21700.8	51945.8	53470	49964.5	54225.9	414.614	418.609	398.4	420.647	0.375996	0.913422	0.881016	0.918203	0.959282	0.965902	0.952534	0.969318	1.22664	1.16991	1.39771	1.1513	0.000202127	0.000651522	0.000560985	0.000566965	0.0123377	0.00519413	0.00611456	0.00574577	20811.6	20933.3	20729.7	21038.5	26487.1	25392.2	30230.1	24931.6	0.0208099	0.00239103	0.00248879	0.00214813
178	3	0.000630461	0.000828588	0.00074541	0.000846083	43883	43906.7	43637.2	43909.8	55501.9	56328.2	48838.2	56149.8	317.459	319.22	296.247	318.76	0.386211	0.931734	0.865437	0.930906	0.974778	0.978416	0.949761	0.977592	1.11338	1.09527	1.59493	1.09765	0.000378399	0.000674604	0.000516237	0.000714782	0.00216818	0.00151936	0.00211559	0.00152075	42794.3	42994.4	41495.6	42966	48738.6	47890.1	75442.6	47996.5	0.0339154	0.00162407	0.0211916	0.00159415
179	3	0.000962565	0.00130956	0.00119102	0.00124275	32333.5	32345.6	32322.7	32346.9	56642.1	57139.4	53673.6	57201.8	320.008	320.609	311.976	320.535	0.388789	0.936531	0.9105	0.936625	0.979927	0.981924	0.96794	0.982255	1.09337	1.07761	1.2036	1.07834	0.000661484	0.00112254	0.000949617	0.00102613	0.00443348	0.00258155	0.00327805	0.00278139	31696.9	31787.3	31294.1	31798.9	35217.3	34720.1	38870.8	34736.6	0.0320598	0.00178571	0.0149462	0.0012887
180	3	0.000501526	0.000698951	0.000682245	0.000756662	40748	40814.4	40258	40695.4	53316.4	54803.1	49049.2	53955.9	374.988	378.735	358.636	376.699	0.380234	0.92225	0.866516	0.916828	0.965212	0.971769	0.950887	0.96802	1.17485	1.13273	1.57087	1.15514	0.000219549	0.000388375	0.000387758	0.000427048	0.00796625	0.00561359	0.00816748	0.00523205	39348.2	39719.4	38186.8	39379	47637.3	45785.6	68526.6	47019.3	0.0222016	0.000587241	0.00311556	0.000889114
181	3	0.000264217	0.000431318	0.000424728	0.00039615	22255.6	22288	22275.2	22285.3	47500.8	51442.9	48683.5	51531.1	591.332	611.11	592.319	610.762	0.362897	0.900047	0.874172	0.901344	0.938176	0.956605	0.945614	0.956838	1.37586	1.22674	1.39478	1.21825	0.000177152	0.000348482	0.000359913	0.000320813	0.00213255	0.000842392	0.00105248	0.0010487	20871	21333.6	21075.9	21337.2	30694.6	27284	31135.6	27123	0.0205282	0.000408545	0.00754042	0.000662315
182	3	0.00360003	0.0045581	0.00362143	0.00453417	25645	25584	25545.4	25593.5	53900.6	54879.6	49959.8	55350	285.859	288.616	275.251	289.19	0.37888	0.916719	0.873375	0.919562	0.970386	0.974159	0.955514	0.976226	1.32425	1.24265	1.68738	1.22276	0.00202597	0.00299743	0.00159038	0.00281662	0.0373888	0.0273046	0.0364069	0.0249273	24977.7	24996.4	24478.9	25064.8	32370.4	30767.2	42009.2	30298.4	0.0204785	0.00178813	0.00283324	0.00180133
183	3	0.000280861	0.000515994	0.000514082	0.000499196	21491.5	21508.6	21459.9	21495.8	55050.4	55665	51932.8	55571.4	394.766	396.184	386.06	396.688	0.384355	0.92725	0.894922	0.926922	0.973398	0.975681	0.961538	0.975203	1.16412	1.11573	1.32697	1.11572	0.000192334	0.000514212	0.000497792	0.000484685	0.00154597	0.000524028	0.000589615	0.000558184	20906.2	20985.9	20681.1	20950.9	25115.2	24014.3	29936.5	24029.9	0.0254324	0.00121036	0.00674536	0.00149972
184	3	0.000588235	0.00124401	0.00129826	0.00126301	31160.8	31184.2	31198.6	31179.3	52296.3	54259.7	50974.5	54009.3	432.827	438.556	422.529	437.469	0.377031	0.918219	0.891516	0.917016	0.961091	0.969568	0.956017	0.968331	1.25777	1.15424	1.2979	1.1564	0.000258156	0.00072039	0.000781124	0.000742791	0.0238074	0.00623764	0.00639211	0.00621084	29955.6	30278.3	29880	30235.5	38104.6	35580.3	40020.3	35682.3	0.0226158	0.000269309	0.000781528	0.000371144
185	3	0.000400323	0.00070126	0.000701844	0.000716622	31325.8	31387.4	31398.7	31385.4	51440.4	53897	48785.1	53690.9	411.033	417.333	392.036	417.267	0.375195	0.916328	0.867844	0.915453	0.956536	0.967779	0.94843	0.966723	1.2262	1.15723	1.49296	1.15824	0.000221146	0.000482518	0.00049012	0.0005191	0.00480007	0.00157729	0.0019644	0.00158344	29958.5	30406.9	29836.6	30376	38481.7	36183.1	47042.1	36241.1	0.0276029	0.000878205	0.011333	0.001071
186	3	0.00149317	0.00179641	0.00127811	0.00191636	29639	29646.2	29218.3	29678	52876.4	54599.5	49505.2	54497	364.447	369.76	356.653	369.175	0.378268	0.919438	0.875578	0.918906	0.963899	0.971419	0.951185	0.970884	1.22392	1.16226	1.4544	1.16222	0.000460025	0.000665598	0.000393137	0.000678105	0.047507	0.0369507	0.0545483	0.0353399	28632.9	28862.2	27654.3	28894.8	35552.5	33712.5	44428.2	33573.9	0.0250348	0.00147298	0.00750576	0.00135032
187	3	0.00045859	0.00059113	0.00054766	0.000643402	21862.8	21827.2	21912.7	21844.6	49704.2	51925.7	47258.9	51742.2	433.444	441.691	412.897	441.382	0.369473	0.902766	0.854156	0.901656	0.949018	0.959055	0.942058	0.958166	1.32579	1.22159	1.60425	1.2259	0.000274765	0.000330509	0.000312586	0.000398382	0.00656163	0.00346144	0.00492246	0.00325865	20813.4	20982.9	20737.2	20996.7	28464.2	26338.6	34336	26414	0.0229637	0.00359707	0.00122651	0.00360526
188	3	0.000332855	0.00044789	0.000345259	0.000449295	30178.9	30174.6	29880.1	30180.6	51397.5	53679	48192.1	53073.8	406.313	413.176	395.051	411.463	0.375039	0.914453	0.863734	0.911312	0.956354	0.966937	0.945709	0.963978	1.22758	1.16767	1.55817	1.17615	0.000139759	0.000244543	0.000136307	0.00024097	0.00495969	0.00317152	0.00438185	0.00301122	28858.1	29176.3	28185.5	29087.7	37218.3	35514.2	50098.2	35663.2	0.0262609	0.00104957	0.00680968	0.000880625
189	3	0.000141865	0.000157404	0.000145345	0.000157665	27934.1	27951.5	27794.9	27974.6	52151.3	54345.6	49261.6	53956.3	496.353	505.97	478.414	504.987	0.377194	0.919656	0.874203	0.917063	0.959779	0.969656	0.949703	0.967941	1.20248	1.14149	1.43499	1.15218	0.000124566	0.000143215	0.000116078	0.000143321	0.000289481	0.000215034	0.000271648	0.000216094	26835.2	27136.4	26400.9	27128.7	33468.5	31713.5	41296.1	31967.5	0.033932	0.00148537	0.0130733	0.00153852
190	3	0.000522854	0.0010991	0.00106542	0.00110309	32265.5	32246.9	31667.1	32191.7	51752	53343.3	47049	53058	342.992	347.317	327.026	345.825	0.375677	0.912703	0.852234	0.910344	0.958386	0.965346	0.941192	0.964197	1.25804	1.1758	1.62976	1.18729	0.00014247	0.000351196	0.000337678	0.000337208	0.0551265	0.0193268	0.023019	0.0183105	30896.3	31103.6	29557.3	30984.2	39143.6	37589.4	55713.7	38163.3	0.0272881	0.000441354	0.0125423	0.000476869
191	3	0.000632627	0.00148453	0.00144425	0.00153628	32350	32327.1	31921.1	32368.3	51920	53398.8	48094.5	53428.7	340.825	344.396	326.815	344.339	0.375944	0.913016	0.861766	0.913141	0.959324	0.965585	0.945642	0.965734	1.29923	1.17263	1.58501	1.17181	0.000223116	0.000433199	0.00039831	0.000442258	0.0994679	0.0165886	0.0200515	0.0154215	30965.6	31170.3	30013.8	31241.7	39353.7	37934.2	54301.7	37816.1	0.024952	0.000101132	0.00999085	0.00041346
192	3	4.92444e-05	8.37961e-05	8.78242e-05	8.37998e-05	38161	38217.6	38246.9	38194.8	49137	50740.8	44983.8	50969.7	554.541	562.78	513.796	563.008	0.368965	0.896453	0.835656	0.897172	0.945313	0.953006	0.931181	0.954319	1.28721	1.23755	1.72409	1.23848	3.20326e-05	8.24548e-05	8.58417e-05	8.25267e-05	0.000198285	9.04749e-05	0.000108146	9.03273e-05	36013.3	36399	35628.3	36414.5	49531	47471.3	66194.6	47589.1	0.0258632	0.00112055	0.00575008	0.00130374
193	3	0.000128104	0.000194821	0.00020022	0.000246054	33817.2	33945.5	34201.4	33926.8	52159.9	54093.6	51220.1	53985.5	418.257	423.008	403.934	423.237	0.377402	0.918125	0.885797	0.917312	0.959723	0.968506	0.959499	0.968055	1.20043	1.147	1.38773	1.15092	4.36588e-05	6.88816e-05	6.91859e-05	9.72341e-05	0.00417152	0.00237852	0.0024737	0.00183567	32400.7	32907.6	32986.6	32866.6	40798.8	38728.3	46029.6	38931.2	0.0271555	0.000768741	0.0075386	0.000856636
194	3	0.00158726	0.00249339	0.00196247	0.00241229	28473.8	28465.1	28342.2	28452.2	54724.9	55455.7	50423.9	55329.4	266.248	267.753	254.678	266.777	0.382188	0.923203	0.878109	0.921984	0.973028	0.975639	0.956781	0.975227	1.25852	1.15931	1.49914	1.17305	0.000639509	0.00101581	0.000618719	0.000997489	0.122726	0.048341	0.0658234	0.0550128	27778.7	27876.7	27199.6	27845.6	32215.2	31495.8	42001.1	31765.8	0.0292266	0.00111922	0.0171483	0.00101173
195	3	0.000164988	0.000248674	0.000221711	0.000214916	29776.8	29860.1	29979	29826.3	52877.7	54266.9	50306.4	54050.4	429.262	433.161	411.732	432.978	0.379421	0.919375	0.881766	0.918094	0.962957	0.969238	0.954508	0.968251	1.17741	1.14133	1.3905	1.14616	0.000104827	0.000221836	0.000166324	0.00016248	0.000635388	0.00035665	0.000451473	0.000425434	28603.6	28924.5	28711.6	28839.2	35523.1	34237.1	42174.2	34456.7	0.030668	0.000823714	0.0126932	0.000827475
196	3	0.000142728	0.000141697	0.00016672	0.000141606	37194.2	37215.2	37440.8	37223.9	52755.7	54222.2	48037.1	54197.2	432.106	436.445	406.503	436.768	0.378887	0.918375	0.860484	0.918719	0.962519	0.969232	0.945583	0.969005	1.18456	1.14863	1.57684	1.14579	0.000115641	0.00011511	0.000151105	0.000114992	0.000252289	0.000248856	0.000244883	0.000248811	35830.1	36118.8	35550.2	36118.8	43882.8	42517.3	56870.5	42367.4	0.0303201	0.000141434	0.0129731	7.24663e-05
197	3	0.000770618	0.0010531	0.000798426	0.00105391	36694.1	36727.7	36354.3	36791.4	51796.9	53454.6	47211.2	53480.5	393.289	398.608	371.427	397.434	0.376003	0.913703	0.851375	0.914016	0.958316	0.965729	0.942737	0.965796	1.21966	1.16716	1.6789	1.16444	0.000370141	0.000669104	0.000415379	0.000662014	0.00654994	0.00372998	0.00845456	0.00372637	35160.7	35485.2	34177.1	35580.6	44882.6	42898.9	64813	42579.5	0.0268739	0.00191417	0.0103057	0.00183337
198	3	0.000912919	0.000901565	0.000701562	0.00100465	36736.3	36796.3	36649.1	36849.4	51963.9	53704.4	48053.5	53465	377.096	382.599	359.015	381.692	0.376048	0.914359	0.860609	0.913594	0.959467	0.967148	0.945761	0.965855	1.24091	1.17131	1.59948	1.16993	0.000688081	0.000741901	0.000453993	0.000815745	0.00254879	0.00316305	0.00464285	0.00210582	35218.2	35599	34637.2	35636	45481.3	42982	60076.6	42807.6	0.027984	0.00195124	0.0128407	0.00207392
199	3	0.000258767	0.000392508	0.000426359	0.000409109	31975.3	32028.1	31966.3	32044.4	50708.1	52885.6	49168.2	53063.9	436.395	442.526	422.218	443.594	0.372995	0.909859	0.870188	0.911156	0.95316	0.963174	0.950355	0.963934	1.24869	1.18301	1.48237	1.17639	0.000165711	0.000313705	0.00035687	0.000343274	0.00145523	0.000709078	0.000715416	0.000673681	30520	30920.5	30435.2	30964.1	39890.7	37630.7	47964.7	37344.9	0.0231626	0.000506949	0.00238791	0.000517559
200	3	7.05959e-05	0.000104195	0.000106123	0.000104244	26081	26148.6	26113.3	26103.2	52724.8	54481	50890.3	54460.6	419.555	423.757	408.931	424.558	0.378867	0.920578	0.887656	0.919875	0.962345	0.970237	0.956632	0.970279	1.18449	1.13726	1.34057	1.1421	5.33733e-05	0.000102587	0.000103764	0.000102628	0.000217497	0.000111601	0.000123908	0.000111819	25085.8	25401	24995.6	25330.3	30989.2	29578.7	34988.6	29820	0.0226324	0.000931398	0.00193914	0.00117107
201	3	0.000262397	0.000400583	0.00037383	0.000415925	32450.2	32413.4	32575	32419.6	48894.9	52142	51232.5	52385.8	444.235	455.499	444.194	457.24	0.367884	0.905	0.887437	0.906797	0.944427	0.959761	0.959129	0.960839	1.30579	1.20356	1.36851	1.19535	0.000111219	0.000315705	0.000286398	0.000322171	0.00146287	0.000895827	0.00112704	0.000792621	30656.7	31094	31317.1	31131.1	42355.6	39130.2	43952.3	38811.9	0.0177281	0.00273619	0.000915018	0.00278639
202	3	0.000288198	0.000665487	0.000670647	0.000645766	28632.1	28623.2	28695.2	28622.7	50141	51908.7	48949.4	52466.9	480.802	488.171	469.317	489.891	0.371628	0.903578	0.871062	0.907422	0.950349	0.958654	0.948431	0.961193	1.26359	1.20912	1.44809	1.19266	0.00012599	0.000464311	0.000459047	0.000443242	0.00536239	0.00162572	0.00176694	0.0016869	27258.8	27484.7	27296.6	27555.6	35876.1	34395.8	41019.1	33927.9	0.0223342	0.00227927	0.000613253	0.00237519
203	3	8.22012e-05	8.12429e-05	8.23829e-05	8.11698e-05	26118.5	26236.9	26327	26171.9	48326.7	50868.9	48260.1	51362.3	517.108	528.006	507.952	531.877	0.365326	0.895406	0.864719	0.899297	0.942383	0.95419	0.945523	0.956336	1.3623	1.25387	1.48274	1.23308	7.96523e-05	7.91144e-05	7.97804e-05	7.91892e-05	9.80131e-05	9.28734e-05	0.00010478	9.15611e-05	24602.6	25110.3	25009.8	25062.6	35515.8	32466.7	38123.8	32103	0.0234774	0.00146307	0.00458956	0.00141834
204	3	0.000431633	0.000493416	0.000643289	0.000546509	29724.8	29785.5	29884.9	29769.6	50170.5	52577.3	47920.1	52182.6	625.36	633.144	594.421	632.695	0.37166	0.908062	0.863875	0.905453	0.950636	0.961767	0.943431	0.959955	1.28702	1.19292	1.48141	1.20382	0.00030675	0.000401674	0.000641133	0.000493265	0.00109035	0.000861889	0.000661207	0.00076106	28217	28654	28270	28578.5	38198.6	35434.1	43800	35817.6	0.029094	0.000925124	0.0061311	0.0010943
205	3	0.000493461	0.000984134	0.0009239	0.000968854	28924.6	28857.3	28807.4	28889.8	49979.8	52750.2	47882.6	52422.2	520.189	534.315	506.122	532.481	0.37054	0.909109	0.865047	0.907234	0.950041	0.96252	0.942798	0.960952	1.2875	1.18578	1.47954	1.19257	0.000185542	0.000477843	0.000428008	0.000488934	0.0165174	0.00601019	0.00762576	0.00660841	27532.4	27801.1	27155	27808.8	36539.4	34053.3	42827.5	34156.6	0.0214229	0.00251703	0.00288294	0.00257738
206	3	0.000140382	0.00013949	0.000144032	0.000154138	33300.4	33318.4	33291	33318.8	52735.4	53875.8	49370.3	54506.6	525.645	530.211	509.95	532.999	0.379082	0.917328	0.879078	0.920875	0.962281	0.967381	0.948853	0.970324	1.18055	1.1478	1.36851	1.13577	0.000113339	0.000112818	0.000115577	0.000138961	0.000249524	0.000246723	0.000263254	0.000215433	32038.4	32244.5	31597.3	32337.8	39301.4	38198.8	45810.3	37773.4	0.0310988	0.000442539	0.0152276	0.000252679
207	3	0.00025325	0.000455211	0.000489002	0.000438948	38903.6	38949.8	38941.8	38958.4	50925.2	53124.4	46023.7	52785.7	481.978	488.602	449.206	487.786	0.373594	0.911797	0.844609	0.909484	0.954223	0.964176	0.936085	0.962639	1.24463	1.17402	1.66319	1.18333	0.000142421	0.000305571	0.000326644	0.000275877	0.00357183	0.00128314	0.0013969	0.00132128	37123.5	37600	36513	37551.9	48258.1	45500.4	64665.9	45829.3	0.0227152	0.000403921	0.00432434	0.000334526
208	3	8.23092e-05	0.000116458	0.000119078	0.00011612	27327.2	27347.9	27413.9	27365.6	49408.4	51646.2	48847.7	52270.8	532.996	542.384	520.696	543.246	0.369466	0.901953	0.870516	0.906109	0.946852	0.957411	0.947985	0.960311	1.28652	1.21673	1.46454	1.1985	5.34892e-05	0.000114663	0.000116812	0.000114455	0.000200417	0.000125425	0.000138299	0.000124345	25858.3	26173	26030	26273.8	35405.8	33399.3	40172.9	32821.1	0.0178441	0.00161777	0.00202466	0.00129106
209	3	0.000848125	0.0014018	0.00145035	0.00146792	26897.5	26852.4	26786.3	26883.4	53277	54800.2	50489	54408.6	396.802	401.465	384.644	399.79	0.380117	0.922234	0.879984	0.919984	0.965068	0.971754	0.956496	0.969944	1.1795	1.13261	1.45819	1.13993	0.000353836	0.000787067	0.00075537	0.000782871	0.0163198	0.00776632	0.00793787	0.00698061	25980.5	26094.9	25620.9	26094.5	31514	30526.7	40093.3	30622.1	0.024488	0.00184966	0.00686058	0.0016396
210	3	0.000168614	0.000378611	0.00039123	0.000378809	26582.1	26554.5	26188.5	26541.3	47032.9	49795	48033.5	49680	611.511	624.1	607.262	621.294	0.36224	0.887484	0.855922	0.887062	0.935259	0.94914	0.947352	0.948519	1.37045	1.28682	1.71902	1.28806	7.10095e-05	0.000323627	0.0003342	0.000323793	0.00184176	0.00060205	0.000636055	0.00060225	24900.1	25214.1	24784.4	25179.4	36337	34142.1	52025.3	34225.7	0.0176453	0.000575032	0.00361194	0.000631655
211	3	0.000677832	0.00101122	0.00115124	0.00107777	27174.2	27176.8	27276.4	27185.4	51593.9	53368.9	48475.2	53662.8	512.092	520.969	494.107	521.111	0.375345	0.913375	0.868266	0.915	0.957453	0.965287	0.946145	0.966676	1.22866	1.16751	1.46949	1.16154	0.000468997	0.000853329	0.00105178	0.000960991	0.00379241	0.00171993	0.00164065	0.00154604	26025.1	26249.1	25881.5	26299.1	33296.8	31674	39563.3	31480.6	0.0237093	0.000571758	0.00167373	0.000425368
212	3	0.000115676	0.000200688	0.000205333	0.000200544	22899.8	23018.9	22978.9	22978.7	50171.6	52409.9	49738.3	52569.5	454.178	461.687	446.997	462.748	0.371478	0.906438	0.878828	0.908031	0.95064	0.961066	0.951506	0.961681	1.26669	1.19841	1.39006	1.19021	7.01423e-05	0.000198387	0.000202478	0.000198368	0.000497984	0.000212097	0.000226462	0.000211193	21709.3	22128.8	21872.1	22077.2	29536.2	27592.4	32369.3	27509.6	0.0215057	0.000569092	0.00719136	0.000758571
213	3	0.00079011	0.00100546	0.000742733	0.000986253	35056.8	35070.6	34818.6	35099.8	55023.3	55696.1	49281.5	55952.9	311.385	313.228	295.319	313.799	0.384362	0.927016	0.870781	0.929031	0.973075	0.975886	0.951151	0.976885	1.13879	1.11723	1.51541	1.10707	0.000405858	0.000612704	0.000418295	0.000581553	0.00609746	0.00431419	0.0104589	0.0043388	34092.1	34217.1	33056.8	34292.4	40109.3	39342	55849.8	38856.6	0.0283485	0.000260617	0.0135534	0.000211254
214	3	5.58066e-05	0.000125627	0.000132585	0.000125526	37063.1	37095.5	37125.5	37069.9	45955	49388.8	43743.9	49545.7	593.065	613.771	577.648	614.488	0.357767	0.884969	0.824984	0.886016	0.930729	0.947212	0.925311	0.947922	1.44589	1.30192	1.81075	1.29428	3.63131e-05	0.000124067	0.000130344	0.000123994	0.000505712	0.000134532	0.000156463	0.000134147	34477.1	35144	34396.9	35131.6	53580.2	48213.7	67109.4	48015.6	0.0187388	0.0008203	0.00142959	0.000925274
215	3	0.000110566	0.000178523	0.000202513	0.00017843	32126.3	32187.7	32229.7	32203.4	50395.4	52079.6	48811.2	52197.5	574.713	581.97	555.079	581.583	0.372168	0.905109	0.868797	0.90575	0.951658	0.959363	0.94822	0.959907	1.25822	1.20224	1.47377	1.19821	7.89832e-05	0.000164114	0.000200648	0.000164061	0.000591594	0.00023745	0.000218925	0.000237185	30547.3	30891.4	30609.9	30932	40631.8	38658.4	47419.8	38477.5	0.0215554	0.00125523	0.00301585	0.00123967
216	3	0.000745498	0.00114484	0.00109481	0.00112585	23402.6	23468.9	23649.7	23438.2	50796.2	53443.7	48835.9	53511.6	463.394	472.54	444.585	473.571	0.372454	0.911984	0.863797	0.912219	0.954252	0.96611	0.950246	0.966517	1.29224	1.18139	1.58667	1.18338	0.00039755	0.000795345	0.000621607	0.000775971	0.0072351	0.0033827	0.00377623	0.00352211	22325.8	22717.6	22598.6	22680.6	30165.7	27490.2	36353.7	27627.6	0.0268242	0.000876722	0.00406141	0.000790079
217	3	0.000387699	0.000470834	0.00040413	0.000487676	27559.5	27569.8	27287.1	27519.2	51779.9	52862.4	47826.3	52868.1	435.759	441.083	422.655	442.238	0.3736	0.904844	0.85575	0.905656	0.960584	0.964794	0.945919	0.964597	1.43072	1.26831	1.68854	1.25537	0.00027341	0.000355908	0.000241816	0.00037677	0.00216712	0.00124323	0.00180258	0.00120713	26532.9	26673.4	25772.8	26587.2	37977.2	34093.6	48355.1	33896.8	0.0237259	0.00367883	0.00565042	0.00360043
218	3	0.000534184	0.000801418	0.000727373	0.000649925	28849.3	28873.8	28935.5	28896.8	51784.7	53588.2	49905.9	53186.9	481.911	487.388	468.56	486.781	0.376556	0.915172	0.877016	0.911844	0.957832	0.966163	0.95329	0.964535	1.20514	1.15788	1.43031	1.17458	0.00029528	0.000692772	0.000511471	0.0004915	0.00234168	0.00138871	0.00160147	0.00201131	27670.1	27951.4	27687.6	27937.2	34573.5	33171.9	41123.4	33564.9	0.0266751	0.000212266	0.0038936	0.000337875
219	3	0.000468256	0.000649329	0.0007321	0.000668997	29086.8	29115	29034	29110.6	51642	53833.2	49782.6	53251.8	493.782	500.226	480.208	498.841	0.376074	0.916453	0.874406	0.912594	0.957241	0.967349	0.953424	0.964749	1.21153	1.15455	1.50334	1.17015	0.000308384	0.000579281	0.000676432	0.000612928	0.00168888	0.00108202	0.000965852	0.00108713	27862.7	28210.3	27767.1	28123.2	35083.2	33391.5	46537.7	33835.5	0.0246372	0.00213187	0.00164561	0.00223186
220	3	0.000651376	0.000845879	0.00091152	0.000984902	26448.9	26440.1	26517	26442.5	50461.6	52700.3	49719.4	52763	517.387	524.385	507.381	526.222	0.372526	0.908906	0.877344	0.909328	0.951878	0.962271	0.951858	0.962538	1.25369	1.18628	1.41207	1.18374	0.00038241	0.000597043	0.00063418	0.00074899	0.00541628	0.00323228	0.0030691	0.00250522	25205.2	25467.2	25324.9	25478.5	32930	31211.1	37122.9	31135	0.0198323	0.00118555	0.00273398	0.00120504
221	3	6.71293e-05	8.33956e-05	8.73452e-05	8.35457e-05	36821.9	36963.6	36625.2	36916.1	49127.9	52362.6	45997.3	52032.2	467.619	476.897	448.218	475.709	0.367012	0.904172	0.842031	0.902359	0.946749	0.961449	0.937007	0.959811	1.34203	1.22101	1.74953	1.22588	5.21469e-05	8.21422e-05	8.53202e-05	8.22577e-05	0.000130752	9.04841e-05	0.000109441	9.05607e-05	34877.4	35611.6	34341.5	35488	49851.3	44710.7	68065.3	45108.3	0.0222844	0.000871608	0.000822599	0.000953297
222	3	0.000291963	0.000476823	0.000463368	0.000477633	38627.9	38731.1	38615.6	38707.3	53291.3	54375.7	49489.8	54220.7	358.817	362.466	343.813	361.499	0.378314	0.916	0.871109	0.914984	0.966706	0.971196	0.952725	0.970436	1.29302	1.24191	1.64209	1.21901	0.000158958	0.000393984	0.000348398	0.000394904	0.00183003	0.000961216	0.00109178	0.000961533	37248	37560.3	36751.9	37456.3	64417	60781.6	84700.1	56637.4	0.0268573	0.000793216	0.012145	0.000925154
223	3	0.00134787	0.00209459	0.00169423	0.00209468	21510.7	21517.6	21548.8	21492.3	54887.3	55844	52127.6	55909.2	329.366	331.393	322.149	331.812	0.384069	0.92825	0.896484	0.928344	0.972508	0.976445	0.962289	0.9768	1.15224	1.11113	1.31643	1.11199	0.000452704	0.000975165	0.0008573	0.000971534	0.0303298	0.0132875	0.029043	0.0132184	20935.6	21049.1	20788	21007.1	24179.8	23622.2	27692	23672.8	0.0201968	0.00138188	0.00302567	0.00159278
224	3	0.00279554	0.00380019	0.00208464	0.00350506	21613	21653.9	21738.1	21687.6	48890.9	51103	48468.6	51033.7	370.466	376.775	365.501	376.282	0.36082	0.884047	0.856688	0.882766	0.951396	0.960583	0.95122	0.960549	2.58284	1.71862	2.13522	1.78576	0.000941845	0.00144371	0.000578831	0.00146206	0.178207	0.101169	0.250261	0.131017	20517.4	20684.5	20590.5	20695.9	209804	96092.7	113578	100827	0.018424	0.00102545	0.00225354	0.000964584
225	3	4.24517e-05	4.25539e-05	4.32211e-05	4.25081e-05	30242.4	30156.7	29810.9	30208.5	47866.2	51310.3	44912.4	51019.9	419.35	433.232	400.404	431.962	0.364427	0.898641	0.831141	0.896078	0.93964	0.95613	0.932595	0.954933	1.34847	1.23499	1.89747	1.24902	3.984e-05	4.07242e-05	4.05129e-05	4.05794e-05	5.73437e-05	5.22951e-05	7.46116e-05	5.29275e-05	28477	28848	27727.2	28898.9	40309.8	37207.8	60240.8	37496.1	0.0192193	0.000936688	0.00112714	0.000966068
226	3	0.000102855	0.000257304	0.000267352	0.000257934	25236.2	25275.3	25089.5	25250	49327.8	52114.9	47935.9	51839.8	520.844	531.643	512.57	530.504	0.368952	0.904219	0.863437	0.901734	0.94666	0.959814	0.943869	0.958757	1.29671	1.21092	1.51936	1.22566	5.0555e-05	0.000203516	0.000210372	0.000203983	0.00193473	0.000474802	0.000507475	0.00047653	23917.4	24314	23677.7	24249.1	32566.8	30316.7	39900.1	30758.9	0.019153	0.00133707	0.00470646	0.00128375
227	3	0.000171225	0.000254611	0.000280986	0.000236148	28293.5	28240	28107.1	28226.7	48852.7	52000	48471.5	52631	452.552	467.059	452.166	469.663	0.36612	0.901656	0.867703	0.907062	0.945445	0.959813	0.946198	0.962312	1.35209	1.23242	1.47131	1.2001	0.000111714	0.000226802	0.000265091	0.0001957	0.000773672	0.000368991	0.000354917	0.000400133	26831.3	27169.7	26611.9	27216.9	37517.4	34414.4	41955.1	33535	0.0223673	0.00149973	0.00492083	0.00123482
228	3	3.52064e-05	3.51795e-05	3.61008e-05	3.52246e-05	37860.7	37842.3	37393.9	37840.8	51417.7	52760.3	43752.2	52572.9	406.181	411.078	373.475	410.308	0.374206	0.908328	0.823766	0.906953	0.957029	0.962841	0.926008	0.962023	1.24549	1.19643	1.89484	1.20121	3.36967e-05	3.38601e-05	3.38571e-05	3.38887e-05	4.36894e-05	4.20298e-05	6.15886e-05	4.20153e-05	36250.5	36439.8	34447.8	36421	47059.5	45249	74743.4	45526.5	0.0222016	0.00154679	0.00868188	0.00148638
229	3	0.000694341	0.0013524	0.00129651	0.00141363	22806.2	22814.3	22800.6	22781.4	54462.7	55346.5	51295.9	55573.1	419.799	421.311	404.383	421.964	0.383262	0.925516	0.891297	0.927188	0.970448	0.974186	0.958291	0.975113	1.15626	1.11985	1.31837	1.11234	0.000244275	0.000844911	0.000755421	0.000919314	0.0126578	0.00500811	0.00566634	0.0046694	22147.4	22259.1	21866.5	22227.7	26055	25358.2	29847.6	25272.3	0.0240738	0.000180307	0.00689262	0.000252127
230	3	0.000834994	0.00123265	0.00101681	0.00119731	22010.9	22010.5	21982.6	22037.2	52107.4	54032	50208.6	54173.8	419.79	427.587	411.128	426.789	0.376602	0.917391	0.878516	0.918438	0.959936	0.968319	0.954922	0.968916	1.21765	1.15153	1.43466	1.14692	0.00046773	0.000795654	0.000557207	0.00076081	0.00836976	0.0038145	0.00677271	0.00404833	21130.6	21327	21023.2	21374.4	26701.3	25339.5	32265.2	25122.4	0.0221685	0.00130418	0.00119338	0.00143025
231	3	0.000957535	0.00136058	0.00114895	0.0013324	29960.2	31544.4	31474.8	31762.2	45477.6	49801.2	42790.7	49522	254.26	260.821	241.94	262.001	0.350208	0.879469	0.810125	0.878719	0.934002	0.952215	0.923631	0.950314	2.04134	1.48779	2.19534	1.41275	0.00040069	0.000524049	0.000448265	0.000499781	0.0882194	0.0462123	0.0654532	0.0496987	27369.5	29729.7	28666.7	29901.6	123620	65407.4	85890.7	52675.2	0.0236431	0.000748066	0.00816928	0.00094359
232	3	0.000270254	0.000456307	0.000472723	0.000456006	18223	18228.5	18380.6	18241.7	52202.5	53585.2	49616.7	53645.4	571.866	577.049	546.536	577.041	0.377474	0.914609	0.8765	0.915203	0.959974	0.966306	0.951478	0.96654	1.20273	1.16306	1.41868	1.16057	0.000123528	0.000257538	0.000287556	0.000267165	0.00849423	0.00407258	0.00437194	0.00403582	17509	17641.2	17591.3	17665	21670.6	21034.8	25096.6	20946.9	0.0234442	0.00114114	0.00120949	0.00109531
233	3	0.000584283	0.000787865	0.000584952	0.000750461	23130.3	23186.9	23028.1	23133.6	50409.1	51621.1	48219.6	52091.1	431.465	435.348	411.943	436.318	0.371569	0.9	0.861672	0.903672	0.95217	0.95781	0.946542	0.959783	1.27276	1.23531	1.5677	1.21342	0.000200141	0.000312705	0.000228645	0.000347491	0.00745324	0.00502221	0.00960997	0.00617617	22004	22228.6	21751.5	22192.6	29432.2	28404.4	37022.3	28065.7	0.0193187	0.000711143	0.00122785	0.000617652
234	3	4.70625e-05	4.7193e-05	4.76937e-05	4.71864e-05	27061.3	27009.4	26596.5	27033.3	46048	50551.3	45813.2	50853.7	454.078	478.651	463.539	478.501	0.354805	0.889078	0.840453	0.890859	0.933916	0.953887	0.936192	0.955458	1.5576	1.30564	1.81305	1.3026	4.38227e-05	4.50441e-05	4.47951e-05	4.50854e-05	7.319e-05	6.13039e-05	7.92805e-05	6.10517e-05	25339.5	25821	24839.7	25902.6	41435.2	35014.2	53664.5	34848.4	0.0199649	0.000818009	0.00454121	0.000612901
235	3	0.000478797	0.000784417	0.000629789	0.000713151	21969.1	22045.8	22144.5	22018.9	50255.6	52518.2	49690.1	52507.3	478.405	485.174	467.341	487.095	0.370905	0.905594	0.874828	0.906016	0.951852	0.96211	0.952569	0.961961	1.33019	1.2175	1.45193	1.21552	0.000248894	0.000493157	0.000329787	0.000430619	0.00727942	0.00341994	0.00480568	0.00400835	20920.5	21261.6	21192	21222.1	29229.7	26522.6	31280.6	26576.7	0.0211909	0.000392523	0.00535199	0.000540629
236	3	0.00106483	0.0014377	0.00115744	0.00154058	20106.9	20153.2	20259.1	20135.3	51739.4	53528.9	49475	53582.9	363.777	368.517	352.976	368.829	0.374727	0.911953	0.871469	0.911875	0.959105	0.966769	0.952238	0.967129	1.29449	1.19184	1.49733	1.19626	0.000397206	0.000580104	0.000477157	0.000703153	0.0350455	0.0214818	0.0321182	0.0220323	19300.7	19529.4	19384.6	19514.3	25535.5	23478.1	28919.5	23628.2	0.0193021	0.00132477	0.000250725	0.00133586
237	3	0.000145462	0.000264889	0.000274577	0.000265343	23139.9	23158.8	23260.1	23148.3	49767.7	52320.3	48933.3	52062.1	519.681	526.848	499.726	528.063	0.370488	0.905797	0.867437	0.904375	0.948588	0.960685	0.949641	0.959429	1.27563	1.20222	1.50951	1.20736	0.000108249	0.000236393	0.000244439	0.000236672	0.00127213	0.00038278	0.000411818	0.000382491	21974.8	22295.7	22185.4	22254.1	29233.2	27557.3	34248.2	27728.1	0.02134	0.000263826	0.00515492	0.00024711
238	1	0.000624191	0.000666561	0.000302066	0.000673954	22517.4	22501.6	21224.8	22574.8	40388.8	42938.7	22982.4	41778.3	621.434	634.621	488.731	623.104	0.33763	0.830688	0.600156	0.820688	0.902782	0.916719	0.800614	0.910864	1.82418	1.66492	6.11971	1.74979	0.000175975	0.000186712	0.00010851	0.000191691	0.0155474	0.013694	0.076659	0.0144737	20371.1	20644.9	16699.1	20617.7	42544.7	38460.3	163031	40145.1	0.0287958	0.00207777	0.017497	0.00234132
239	1	0.000171775	0.000184948	0.000209415	0.000185344	27617.3	27659.4	27720.2	27836.4	41598.4	45689.8	31973.9	45710.1	406.973	430.718	363.467	429.979	0.334701	0.840453	0.713484	0.837406	0.916522	0.935492	0.860843	0.936781	2.39782	1.93646	3.5942	1.99537	0.000153052	0.000181847	0.000202717	0.000182331	0.000272774	0.000211742	0.00030298	0.000216131	25173.1	25649.9	23831.7	25898.8	136124	107174	184587	107974	0.0177613	0.00188655	0.00164035	0.00181246
240	1	0.00647061	0.00730232	0.00410711	0.00750027	12415	12421.3	12216.2	12444.5	49655	51004.8	41110.5	50589.8	332.923	337.684	301.651	335.069	0.364889	0.887234	0.791203	0.883922	0.952452	0.957946	0.917146	0.956122	1.49075	1.39373	2.70522	1.39577	0.00208832	0.00250496	0.00139625	0.00256003	0.223754	0.188011	0.551637	0.168363	11836.5	11925.2	11122.7	11946.3	16227.2	15405.1	30260.6	15632.6	0.0240573	0.000860925	0.0117479	0.000682318
241	1	6.13796e-05	6.15053e-05	6.2395e-05	6.18099e-05	21075.8	20987.8	20869.7	20944.2	43546.6	47252.1	36509.8	47503.7	500.646	511.259	439.273	513.538	0.348405	0.866094	0.758031	0.867563	0.919679	0.937991	0.888267	0.939405	1.61656	1.42648	2.7221	1.4308	5.65633e-05	5.77897e-05	5.5845e-05	5.83271e-05	9.95556e-05	8.65535e-05	0.000157635	8.54079e-05	19388.2	19655.1	18447	19636.4	33684.5	30163.3	57922.8	30638.4	0.0263437	0.00060343	0.0122275	0.000636005
242	1	9.10357e-05	9.29072e-05	9.69451e-05	9.41042e-05	18703.4	18739.9	18112.9	18699.6	47776.6	48495.7	28942.3	49437	471.276	473.924	377.573	477.268	0.364115	0.878859	0.678906	0.886312	0.939174	0.942746	0.84149	0.947052	1.35006	1.32686	3.98992	1.28595	8.389e-05	8.78325e-05	8.30684e-05	9.00925e-05	0.000126125	0.000121517	0.000312793	0.000114591	17583.5	17695.3	15144.9	17722	25275.1	24687.5	84625.5	24072.6	0.0401451	0.000941283	0.0323083	0.00101357
243	1	0.000449581	0.000423212	0.000345291	0.000487249	15089.6	15078.9	15164.7	15100.5	50213.1	51047.4	41646.2	50441.3	658.24	662.931	594.811	655.47	0.371602	0.8975	0.808937	0.892328	0.950803	0.954719	0.914166	0.952194	1.26448	1.23747	1.95635	1.268	0.000221969	0.000178631	0.000174805	0.000229412	0.00839121	0.00803956	0.0156557	0.00680744	14374.6	14419	13929.2	14411.9	18763.3	18404.9	28877.8	18798.8	0.026907	0.00288292	0.0141992	0.00285627
244	1	5.96743e-05	5.96557e-05	5.97657e-05	5.96177e-05	20621.4	20605.6	20612.9	20643.4	47323.7	48770.2	37847.7	48854.4	571.016	581.706	509.231	580.697	0.362285	0.881484	0.771203	0.882	0.937324	0.943888	0.895322	0.944304	1.38351	1.31057	2.3901	1.3075	5.58531e-05	5.62077e-05	5.34924e-05	5.62047e-05	8.25205e-05	7.82691e-05	0.000142327	7.83476e-05	19343.4	19460.5	18471.3	19518.5	28461.9	27024	49454.7	26809.8	0.0274372	0.00168309	0.0138844	0.00187014
245	1	5.3734e-05	5.37559e-05	5.38907e-05	5.38826e-05	22716.1	22712.5	22294.8	22682	46951.2	48500.9	29170.3	48876.5	562.067	570.062	456.453	570.974	0.360182	0.876062	0.682109	0.880984	0.936099	0.943664	0.84263	0.944766	1.41544	1.35839	3.97549	1.31909	5.04894e-05	5.08896e-05	4.52694e-05	5.11471e-05	7.51719e-05	7.18424e-05	0.000197352	6.93136e-05	21235.2	21412.3	18719.7	21388.6	32234.3	30998.7	99122.3	30207.5	0.025565	0.00378267	0.0187389	0.00391778
246	1	0.000370331	0.000713685	0.000863834	0.000720024	22901.1	22846.3	21498.4	22613.8	43333.9	45367.3	32416.8	46884.1	359.916	370.925	292.936	367.586	0.345215	0.845125	0.706531	0.859641	0.920542	0.930652	0.868817	0.937214	1.70139	1.57773	3.7482	1.47543	0.00021332	0.000368483	0.000460692	0.0003971	0.0146941	0.00447235	0.00538441	0.00436264	21209.3	21364.4	18248.2	21178.2	37027.9	34654.8	97468.1	33375.4	0.0226987	0.0058815	0.00896387	0.00584913
247	1	7.31214e-05	7.30417e-05	7.51648e-05	7.33469e-05	18992.7	18994.1	18124	18948.2	45737.1	48319.5	36764.4	47752.9	484.743	497.551	447.865	494.744	0.355488	0.874734	0.759203	0.870078	0.930795	0.942806	0.88998	0.940169	1.49838	1.36641	2.59762	1.39107	6.7931e-05	6.87256e-05	6.74526e-05	6.90013e-05	0.000109056	9.99746e-05	0.000167637	0.000100745	17746.1	17975.9	15879.2	17863.9	28001	25469.1	56708	26168.3	0.0209755	0.000691264	0.00773744	0.000601795
248	1	4.61588e-05	4.54558e-05	4.65121e-05	4.54256e-05	24811.8	25279.3	24718.8	25262	36089.8	42224.7	27278.5	40820.4	491.673	518.674	420.002	519.277	0.318021	0.819609	0.664172	0.811922	0.882006	0.915215	0.82724	0.905782	2.48542	1.84219	3.97144	1.79951	4.13431e-05	4.19627e-05	3.93211e-05	4.15147e-05	9.89379e-05	7.72031e-05	0.000159744	7.6102e-05	21526.7	22965.4	20051	22696.7	70359.6	49491.1	111358	48303	0.0244218	0.00345464	0.00654553	0.00356187
249	1	4.7389e-05	4.74596e-05	4.99089e-05	4.73679e-05	24522.7	24422.3	23388.8	24458.8	40149.9	42681.5	25407.6	42751.2	585.232	600.507	481.51	597.487	0.33362	0.82575	0.632563	0.822531	0.904637	0.91661	0.818907	0.918497	2.01405	1.73974	5.57692	1.82801	4.3028e-05	4.37047e-05	4.18786e-05	4.35382e-05	9.17237e-05	7.92441e-05	0.000219416	8.24347e-05	22112	22261	18775.8	22385.7	51272.8	44670.6	161523	47012	0.0252502	0.000806223	0.0169165	0.000942529
250	1	7.39756e-05	7.35019e-05	8.12058e-05	7.41068e-05	22470	22425	21068.8	22437.1	47381.4	49333.4	31030.8	49497.7	425.909	437.031	340.465	433.775	0.360645	0.883219	0.691063	0.881828	0.939055	0.9473	0.860523	0.948988	1.43573	1.31518	4.01026	1.34692	6.98174e-05	6.96327e-05	7.29695e-05	7.0736e-05	0.000101929	9.46337e-05	0.000217986	9.50369e-05	21114.8	21224.1	17631.3	21283.2	32325.4	29698.2	105670	30393.9	0.0315296	0.000926508	0.0213071	0.000912151
251	2	0.000891931	0.00126607	0.000775118	0.000933917	19208.8	19192.8	19290.6	19221.1	51973	52663.3	46934.8	52982	478.005	479.819	449.929	481.641	0.375944	0.906922	0.852234	0.908266	0.95968	0.962703	0.940429	0.964466	1.25514	1.21196	1.66452	1.24189	0.000231436	0.000306609	0.000240321	0.000265805	0.0634082	0.0379982	0.106205	0.0727724	18447.8	18493.1	18185.5	18567.6	22891.3	22572.2	29559.9	22448.9	0.0266419	0.00167997	0.0114822	0.00142245
252	2	0.000262221	0.000418104	0.000484696	0.000433534	34818.7	34720	34348.1	34774.5	46893.2	49094.9	33097.6	49609.3	597.556	607.404	485.168	609.744	0.36028	0.880609	0.717484	0.885234	0.935738	0.946509	0.871084	0.948607	1.42019	1.33902	3.40896	1.30594	0.000154676	0.000354971	0.000333813	0.000362319	0.00221046	0.00103161	0.00114353	0.000919997	32581.2	32815.9	29741.7	32972.8	49226.8	46850.4	122070	45499.3	0.0260289	0.000530907	0.0137689	0.000828951
253	2	0.000792857	0.000866531	0.000485304	0.000850818	20983.1	20947.1	20978.4	20938.5	52933	54648.7	49993.8	54218	453.916	462.169	434.787	460.494	0.37735	0.920047	0.877453	0.916844	0.964663	0.971384	0.954173	0.9696	1.22551	1.14634	1.60924	1.16176	0.000362978	0.000488404	0.000213309	0.000403959	0.00336033	0.00309994	0.00782502	0.00294464	20243	20325	20014.5	20277.1	25771.1	24201.7	34465.2	24566.7	0.0200477	0.000468954	0.00174338	0.000221591
254	2	0.000679348	0.000736759	0.000356278	0.000775663	17608.6	17587.3	17467.3	17595	49680.1	52319.2	40628	51456.8	538.502	550.472	488.074	546.95	0.369544	0.904266	0.795641	0.899125	0.948603	0.961141	0.910738	0.956965	1.29181	1.2185	2.24748	1.23658	0.000247589	0.000319144	0.000178929	0.000335603	0.00832881	0.00761263	0.0288554	0.0069264	16723.6	16908.1	15871.4	16849.7	22548.5	21308.3	40494.7	21639.1	0.0301378	0.0037727	0.0167864	0.00349182
255	2	7.7734e-05	7.7652e-05	7.98737e-05	7.8003e-05	15947.5	15885.6	15261.9	15841.1	35966.5	41702.5	32499.8	42226	526.641	563.395	521.28	573.445	0.317559	0.810562	0.716359	0.819203	0.880541	0.913748	0.865114	0.914919	2.26451	1.8742	3.56713	1.76822	6.84331e-05	7.08175e-05	6.98868e-05	7.14506e-05	0.000174792	0.000143843	0.000243796	0.000134379	14100.6	14562	13019.6	14510.6	35391.4	29701.9	65729.1	28294	0.0170323	0.00214334	0.00420849	0.00206999
256	2	5.2796e-05	5.26602e-05	5.22865e-05	5.25263e-05	23920.7	23970.5	24083.7	24018.3	46120.9	48379.9	38289.5	48444.4	517.126	528.366	469.137	526.85	0.357884	0.876547	0.773453	0.876766	0.931803	0.942629	0.898331	0.94306	1.44633	1.34584	2.37999	1.34867	4.94669e-05	4.9857e-05	4.6956e-05	4.96716e-05	7.35466e-05	6.89677e-05	0.000123232	6.94619e-05	22228.8	22550.8	21685.4	22630.6	35545.6	32845.3	59059	32772	0.0231129	0.000436224	0.00787025	0.00044851
257	2	0.000123099	0.000121503	0.0001479	0.000139437	23330	23405.4	23079.3	23380.7	47527.8	49683.8	42073.4	49537	554.492	564.6	526.532	563.571	0.361764	0.885969	0.811406	0.883547	0.939258	0.948893	0.916992	0.948627	1.40976	1.30112	2.04221	1.32202	9.32545e-05	9.26367e-05	0.000129568	0.000123787	0.000249119	0.000240787	0.000248281	0.00020681	21818.2	22153	21009.1	22099.4	33997.7	31139.2	52810.5	31659.4	0.0242892	0.00106194	0.0104394	0.000915904
258	2	6.59752e-05	6.60536e-05	6.63348e-05	6.61144e-05	18993.9	19002.7	18927.2	18973.9	50618.2	52325.8	47449.2	53194.9	549.575	554.449	527.969	558.965	0.372507	0.906016	0.861328	0.91175	0.95286	0.960653	0.940937	0.964608	1.25561	1.19969	1.52479	1.17549	6.27788e-05	6.34294e-05	6.24796e-05	6.37795e-05	8.31256e-05	7.93083e-05	9.81721e-05	7.75175e-05	18115.9	18276.9	17798.3	18306.7	23776.2	22681.1	29586.5	22300.9	0.0217046	0.000869725	0.00373616	0.00129958
259	2	0.000179249	0.000196252	0.000185744	0.000195842	14675.6	14614.7	14521.7	14625.2	47956.9	50041.1	42217.2	50013.2	461.565	469.394	433.407	470.342	0.363659	0.887969	0.813484	0.887281	0.940829	0.950695	0.917093	0.950753	1.37198	1.29256	1.90392	1.30173	0.000145543	0.000177561	0.000148044	0.000176933	0.000331015	0.00028174	0.000396217	0.000284908	13896	13945.9	13320.7	13965.3	19404.4	18448.9	27651.6	18535.7	0.0221022	0.00118697	0.00445938	0.00108692
260	2	5.94669e-05	5.93445e-05	5.92613e-05	5.91356e-05	19067.2	19084.8	19126.1	19121.5	43138.8	46796	40716.7	46467.6	760.753	788.347	725.695	785.005	0.347676	0.864781	0.802172	0.86175	0.916846	0.934923	0.908658	0.933465	1.59646	1.41091	1.97285	1.42976	5.47525e-05	5.56791e-05	5.39482e-05	5.52502e-05	9.2245e-05	8.20431e-05	0.00011473	8.36128e-05	17444.6	17808.3	17369.8	17840.4	30899.1	27207	37841.1	27485.4	0.0211744	0.00155426	0.00188908	0.00145838
261	2	4.67831e-05	4.67983e-05	4.69108e-05	4.67398e-05	26224.2	26210.2	26103	26231.2	47772.6	49921.4	44883.5	50704.1	588.275	599.761	564.619	603.363	0.363659	0.888984	0.838938	0.894047	0.939518	0.949624	0.929424	0.953406	1.36399	1.27955	1.69891	1.25783	4.41144e-05	4.46241e-05	4.38132e-05	4.46962e-05	6.26479e-05	5.86955e-05	7.72199e-05	5.77864e-05	24641.8	24884.2	24188.6	25022	35725.7	33567.1	44866.5	32975.6	0.0224501	0.000690749	0.00558442	0.0010965
262	2	0.000299597	0.000280218	0.000306489	0.000296494	23698.4	23660.4	23243.3	23597.5	51486.4	53443	43214.9	53803.7	365.556	370.169	336.03	371.926	0.372995	0.908469	0.812781	0.912453	0.958416	0.967111	0.926302	0.968263	1.28657	1.21733	2.27294	1.19119	0.000256839	0.000261551	0.000244086	0.000266352	0.000480356	0.000707274	0.000604535	0.000496884	22772.1	22916.9	21487.1	22853.9	29901	28403.1	59382.7	27995.4	0.0262111	0.00207334	0.0153101	0.00188008
263	2	0.000193085	0.000244376	0.000258294	0.000244087	22632.1	22583.7	22591.8	22616.4	48579.2	49931.6	43713.9	50119.3	657.523	666.952	618.057	666.61	0.366419	0.888844	0.830063	0.89	0.943213	0.949719	0.923328	0.950658	1.32707	1.28074	1.75179	1.27637	0.000161075	0.000241844	0.000254483	0.000241594	0.000405081	0.000258308	0.000294033	0.000258	21385.5	21456.6	20886.1	21529.7	29778.4	28870.6	39881.4	28686.8	0.0217874	6.56416e-05	0.00591825	0.000345284
264	2	3.86515e-05	3.85987e-05	3.85779e-05	3.8652e-05	29356.5	29376.4	29448.1	29365.4	46269.3	48587.1	39688.3	48780.4	616.885	633.533	572.389	633.07	0.358678	0.880391	0.790125	0.881016	0.932276	0.94295	0.904407	0.944086	1.43274	1.31465	2.15931	1.3146	3.61514e-05	3.6489e-05	3.49652e-05	3.6623e-05	5.42018e-05	4.98888e-05	8.20836e-05	4.97726e-05	27293	27635.1	26598.3	27651.6	42709.1	39157.7	63778.9	39179.1	0.0228146	0.00143812	0.00922864	0.00165218
265	2	6.12989e-05	6.1177e-05	6.09246e-05	6.13383e-05	19186.4	19244.2	19291.4	19178.5	46205.9	47981.5	37683.3	47876.9	605.948	609.995	536.736	613.537	0.358724	0.872969	0.769719	0.873766	0.931737	0.94092	0.894448	0.939883	1.42279	1.36907	2.45966	1.35391	5.71094e-05	5.7485e-05	5.42677e-05	5.76607e-05	8.72281e-05	8.4302e-05	0.00015122	8.28138e-05	17907	18167	17332.3	18049.9	27130.2	25907.6	46588	25834.5	0.0261449	0.000804283	0.0109532	0.000874136
266	2	5.20424e-05	5.21758e-05	5.19203e-05	5.19804e-05	21404.9	21356.6	21483.3	21422.6	46328.8	48009.2	39805	48219.6	694.721	704.633	632.635	705.423	0.359056	0.872828	0.788781	0.875219	0.932424	0.941246	0.906191	0.941974	1.42003	1.37821	2.27951	1.35677	4.85169e-05	4.91672e-05	4.6999e-05	4.891e-05	7.3778e-05	7.10323e-05	0.000119093	7.0675e-05	19981.8	20100.8	19509.3	20210.2	30293.4	29606.9	48130.4	28854.6	0.0229803	0.000780259	0.00971416	0.000252483
267	2	6.36229e-05	6.31764e-05	6.24715e-05	6.3386e-05	19630.1	19733.8	19882.2	19675.6	46573.5	48742.4	41119.4	50258.8	512.456	525.193	486.276	533.886	0.357357	0.873609	0.799453	0.887594	0.936013	0.946478	0.913379	0.952504	1.53981	1.43385	2.14627	1.32556	5.95619e-05	5.96494e-05	5.66212e-05	6.03039e-05	9.59155e-05	9.14401e-05	0.00014203	8.38126e-05	18387	18730.8	18262.7	18771.5	30250.8	27691.8	40307.7	25826.7	0.0235271	0.00141322	0.00505794	0.00140358
268	2	6.02187e-05	5.95229e-05	5.93589e-05	5.95628e-05	19500.2	19629	19684.4	19619.8	38690.8	46626.9	43368.2	46524.9	588.502	658.176	635.216	657.75	0.329753	0.863219	0.830703	0.862781	0.894625	0.934171	0.91997	0.933533	1.96778	1.41983	1.66467	1.41762	5.43465e-05	5.58018e-05	5.47808e-05	5.58333e-05	0.000110838	8.24097e-05	9.78232e-05	8.22032e-05	17337.9	18284.8	18068.3	18254.1	39912.2	28385.9	32888.8	28353.3	0.0217211	0.000870456	0.00648848	0.000806564
269	2	9.08922e-05	0.000124644	0.000136096	0.000125026	33798.9	33607.6	34030	33682.3	47502	50587.5	37455.7	50288.5	333.019	340.371	290.876	340.927	0.360202	0.890984	0.768563	0.887828	0.940413	0.953631	0.892832	0.952579	1.46543	1.29211	2.56892	1.31458	6.08021e-05	0.000122259	0.000130525	0.000122691	0.000220928	0.000138154	0.000214351	0.000139238	31805.2	31966	30497.3	32042.1	50711	45271.3	86213.3	46143.8	0.0210087	0.00377433	0.00977539	0.00391608
270	2	0.00237603	0.00289904	0.00162421	0.00261225	19134.4	19276.7	19283	19277.4	46928.9	51778.6	49092.4	51866.1	410.352	432.32	421.196	432.609	0.356882	0.897609	0.872594	0.897687	0.939004	0.959597	0.949367	0.960267	1.57075	1.27046	1.53612	1.29172	0.000628735	0.000726228	0.000482087	0.000822126	0.091866	0.0597956	0.167346	0.0801014	17936.4	18523.7	18299.1	18531.9	29610.2	23522.3	26571.3	23563.9	0.0201471	0.00131947	0.00516975	0.00128186
271	2	6.12162e-05	6.09321e-05	6.10565e-05	6.09034e-05	21901.9	21979.9	21927.6	21995.4	49149.9	51807.2	42422	51017.9	512.454	525.555	479.018	520.908	0.366458	0.900203	0.815984	0.894	0.94722	0.958914	0.918037	0.955555	1.35148	1.23653	1.92911	1.27262	5.8163e-05	5.84729e-05	5.61957e-05	5.82337e-05	7.99965e-05	7.42356e-05	0.000114545	7.64327e-05	20685.1	21043.2	20085.9	20991.3	30436.2	27532.1	43880.2	28279.3	0.023378	0.0011209	0.0123103	0.000906433
272	2	6.1594e-05	6.14514e-05	6.09841e-05	6.14472e-05	20051.6	20090.6	20185.9	20074.4	50307.3	52127.9	43055.3	51565.3	576.43	585.36	533.074	583.48	0.371484	0.903953	0.818594	0.900438	0.951513	0.959949	0.92258	0.957334	1.26947	1.21235	2.04562	1.22906	5.87264e-05	5.90395e-05	5.61123e-05	5.88529e-05	7.70982e-05	7.41423e-05	0.000127814	7.50044e-05	19053.5	19281	18644.6	19207.1	25669.6	24380.4	40254.3	24807.2	0.0259461	0.00113288	0.00684612	0.000900311
273	2	5.39939e-05	8.89182e-05	9.32151e-05	8.89246e-05	34934.5	34983	35122	35025.6	45435.5	48507.9	42483.4	48464.5	623.4	644.991	585.863	643.982	0.355332	0.877859	0.816734	0.877125	0.928644	0.943184	0.918652	0.94308	1.48651	1.34001	2.05571	1.34402	3.5468e-05	8.71428e-05	9.06836e-05	8.71283e-05	0.000215586	9.96019e-05	0.000126329	9.99142e-05	32433.8	33011	32314	33066.7	51948.8	46629.4	70466.3	46627.7	0.0209093	0.00210993	0.0034502	0.00202045
274	2	4.09544e-05	4.06752e-05	4.05001e-05	4.05125e-05	26718.9	26844.1	26948.1	26961.7	40485.6	47564.4	45114.9	47804.6	653.044	712.188	699.689	714.773	0.335729	0.867891	0.846359	0.872859	0.905109	0.939675	0.928489	0.939725	1.86724	1.42094	1.56601	1.36484	3.73025e-05	3.83294e-05	3.76484e-05	3.81286e-05	7.25472e-05	5.60793e-05	6.2645e-05	5.469e-05	24062.9	25163.2	24998.5	25315	52018.2	39221.2	42739.1	37082.7	0.020959	0.00135515	0.00936488	0.00177399
275	2	4.83175e-05	4.8316e-05	4.87384e-05	4.84378e-05	23668.2	23660.6	23476.5	23586.3	44454.5	47786.8	39216.3	47833.1	655.888	673.263	602.239	678.845	0.352428	0.871719	0.783078	0.872719	0.923405	0.93997	0.903225	0.939905	1.52125	1.37731	2.35178	1.36316	4.47358e-05	4.55231e-05	4.42432e-05	4.56877e-05	7.27599e-05	6.56857e-05	0.000108283	6.45668e-05	21847.6	22228.8	21131.3	22128.8	35987.5	32640.5	57343.7	32603.6	0.0219531	0.00153222	0.00486007	0.00171942
276	2	4.37338e-05	4.36965e-05	4.38435e-05	4.36874e-05	26048.5	26033.6	26012.7	26045.7	48128.1	49391.1	38479.7	49991.1	590.092	601.396	525.609	603.2	0.364707	0.885484	0.779234	0.889672	0.94124	0.946973	0.897891	0.949946	1.34997	1.2923	2.31585	1.27803	4.121e-05	4.14021e-05	3.94186e-05	4.15161e-05	5.85701e-05	5.61913e-05	9.81071e-05	5.55474e-05	24508.9	24639.2	23367.6	24731.4	35276.3	33820.5	61952	33409.9	0.023875	0.000360045	0.0150939	0.000387065
277	2	3.29867e-05	3.28585e-05	3.31808e-05	3.29374e-05	37559.6	37564.2	37522.4	37565.1	51079.9	52667	42955.2	52362.4	462.725	471.283	422.132	469.45	0.372044	0.905734	0.817984	0.90275	0.956285	0.962938	0.921851	0.961833	1.28488	1.21611	1.99125	1.23501	3.16034e-05	3.16243e-05	3.07122e-05	3.17192e-05	4.19171e-05	4.00359e-05	6.31911e-05	4.04664e-05	35987.2	36250.6	34639.6	36199.8	47669.7	45095.3	74826.8	45770.1	0.0284644	0.00149787	0.0190048	0.00139005
278	2	5.75498e-05	5.73475e-05	5.74074e-05	5.74691e-05	20205.9	20260.7	20283.6	20209.3	48449	50519.5	44924.7	50906.5	637.59	649.586	607.044	654.874	0.365391	0.891766	0.840656	0.895672	0.943068	0.952842	0.928906	0.954251	1.34908	1.2743	1.6328	1.24753	5.4368e-05	5.46377e-05	5.33427e-05	5.49085e-05	7.67364e-05	7.31477e-05	9.3345e-05	7.13003e-05	19046.7	19326.3	18867.9	19276.5	27301.7	25618.4	32707.8	25231.8	0.0225992	0.000986263	0.00321853	0.000570237
279	2	7.26075e-05	7.25825e-05	7.21013e-05	7.25888e-05	15026.1	15026.7	15137.4	15027	44068.3	46588.1	40168.5	46617.2	885.41	907.141	830.539	906.761	0.351979	0.863078	0.797078	0.864328	0.920751	0.93396	0.905627	0.933753	1.51572	1.42104	1.98934	1.40597	6.68102e-05	6.77293e-05	6.49801e-05	6.77136e-05	0.000110432	0.000103685	0.000147254	0.000102477	13854.8	14056.2	13786	14054.8	22553.4	21132.2	29110	20922.2	0.0225827	0.000532366	0.00159272	0.000560777
280	2	6.06496e-05	6.0761e-05	6.07203e-05	6.07228e-05	19853.2	19810.3	19825.3	19830.9	50490.6	52669.5	47671.8	52382.4	605.264	617.085	586.227	613.039	0.37222	0.908672	0.865141	0.906312	0.952222	0.962123	0.94133	0.960929	1.25832	1.18693	1.4597	1.19871	5.769e-05	5.84821e-05	5.71455e-05	5.83403e-05	7.65483e-05	7.19689e-05	8.87386e-05	7.277e-05	18936.3	19063.4	18672.4	19074.8	24780	23482.6	28791.1	23667.1	0.0249022	0.000976908	0.00651212	0.000623783
281	2	7.92829e-05	9.63908e-05	9.83646e-05	9.62499e-05	19499.9	19526.8	19537.7	19516.7	50720.9	51826	46731.8	52521.6	605.947	609.945	575.541	613.166	0.372917	0.902453	0.854281	0.906891	0.95324	0.958394	0.938006	0.961656	1.24846	1.21533	1.54819	1.19781	6.34112e-05	9.38967e-05	9.45996e-05	9.39849e-05	0.000146158	0.000109081	0.000131092	0.000107785	18571.3	18714.6	18331.3	18759.8	24444.5	23732.6	30201.9	23410.4	0.0245046	0.000922595	0.0072134	0.000584672
282	2	4.83966e-05	4.84265e-05	4.84798e-05	4.8426e-05	22414.8	22409.4	22397.2	22408.5	44330	49578.7	46172.2	48228.7	799.665	840.149	806.84	829.429	0.35125	0.885656	0.856281	0.876078	0.923359	0.948296	0.933264	0.94176	1.54967	1.30168	1.50005	1.3477	4.47308e-05	4.59779e-05	4.53258e-05	4.56565e-05	7.48744e-05	6.27064e-05	7.20335e-05	6.48979e-05	20684.6	21238.3	20883.1	21093	34712.3	29210.9	33703.4	30262.6	0.0220028	0.00103664	0.0104263	0.00117265
283	2	7.40539e-05	7.39965e-05	7.45098e-05	7.36846e-05	22665.7	22662.3	22736	22663.3	51706.7	52924.6	45599.4	53015.9	564.179	568.694	530.732	570.358	0.375534	0.910188	0.844016	0.910219	0.957969	0.963322	0.933143	0.963893	1.22329	1.18156	1.6674	1.18382	7.1764e-05	7.21085e-05	7.03486e-05	7.1591e-05	8.59752e-05	8.32723e-05	0.000112944	8.39859e-05	21688	21800.8	21242.3	21824.7	27873.7	26926.2	38090.4	27027.1	0.0231294	0.000805226	0.00700938	0.000937544
284	2	0.000167344	0.000164884	0.000169569	0.000199152	27244.1	27233.1	27354.1	27244.4	50500.1	53212.6	49127.8	53219.8	528.261	540.752	516.208	539.054	0.372448	0.912172	0.877328	0.912281	0.952109	0.96461	0.947834	0.964628	1.25245	1.17241	1.38499	1.17196	0.000138906	0.000147968	0.000151292	0.000197482	0.00028407	0.000310053	0.000330426	0.000207174	25974.8	26302.6	26006.8	26320.8	33858.1	31739.7	36916.4	31701.3	0.0205116	0.00129273	0.000526551	0.0011213
285	2	6.4167e-05	6.37987e-05	6.39271e-05	6.4085e-05	19578.6	19641.5	19670	19616.3	47950.6	50745.5	46662.5	50587.3	557.617	573.203	544.44	569.73	0.363327	0.894016	0.853703	0.892641	0.941046	0.953686	0.937677	0.95302	1.38015	1.25875	1.55331	1.26591	6.05074e-05	6.07716e-05	5.9926e-05	6.11523e-05	8.73933e-05	8.08532e-05	9.92021e-05	8.0371e-05	18427.8	18774.7	18484.8	18724.5	26966.4	24425.9	29925.4	24651.8	0.0194513	0.000322043	0.00112005	0.000126392
286	2	7.50703e-05	7.50305e-05	7.434e-05	7.4944e-05	19771.1	19752.4	19919.1	19774.1	52522.6	53344.6	45466.6	53827	454.5	457.43	422.991	459.208	0.377943	0.912266	0.839094	0.915578	0.961619	0.965392	0.934137	0.967543	1.19641	1.17496	1.79468	1.1619	7.21779e-05	7.24048e-05	6.91318e-05	7.24148e-05	8.94755e-05	8.80332e-05	0.000139986	8.72012e-05	19055.5	19096.2	18700.9	19176.1	23436.5	23039.8	33738.7	22739.1	0.0248028	0.00194743	0.0146149	0.00205679
287	3	3.69191e-05	3.68087e-05	3.68729e-05	3.68727e-05	34529	34645.5	34595.8	34589.6	51047.2	52639.9	45914.5	52474.9	416.721	420.354	386.85	420.617	0.373828	0.90825	0.8405	0.90675	0.954871	0.962098	0.936837	0.96143	1.24633	1.19285	1.7764	1.1991	3.52371e-05	3.5333e-05	3.44462e-05	3.54265e-05	4.55089e-05	4.39568e-05	6.34422e-05	4.4126e-05	32997.8	33419.2	32504.8	33287.1	44467.9	41795.8	63915.8	41921.5	0.0322752	0.000858725	0.0171981	0.000710266
288	3	0.00123869	0.00134027	0.00086528	0.00135965	37683.7	37662.5	36472.7	37698.7	55770.3	56231.7	47275.9	56234.8	289.497	290.797	266.856	290.597	0.386191	0.929562	0.847328	0.929344	0.976404	0.978399	0.945139	0.978492	1.12204	1.11064	1.90389	1.11322	0.000771762	0.000909462	0.000440725	0.000919458	0.0044649	0.00403985	0.0105336	0.00386823	36766	36768.6	34213.7	36851.8	44264.5	43595.3	94795.1	43736	0.0483465	0.000734535	0.0388699	0.000609781
289	3	0.00147053	0.00225821	0.00188178	0.00239437	26716.3	26702.8	26745.1	26713.5	55936.5	56616.2	50897	56555.4	272.567	273.565	259.229	272.699	0.386888	0.933109	0.884016	0.932531	0.97698	0.979744	0.958017	0.979528	1.11574	1.09141	1.42054	1.09433	0.000622314	0.00136293	0.00100159	0.00149841	0.0175593	0.00898436	0.0148141	0.00821791	26166.3	26233.2	25726.4	26242.4	29208.5	28770.3	37592.8	28813.4	0.0422162	0.00275599	0.031067	0.00289329
290	3	0.00272859	0.00298542	0.00145754	0.00301263	28153.1	28168.4	28139.3	28188.6	52953.5	54487	49442.3	54958.4	371.294	375.362	357.366	376.419	0.37806	0.917813	0.869391	0.920672	0.964422	0.971059	0.953015	0.97317	1.21722	1.16415	1.65928	1.15323	0.00160989	0.00171591	0.00042042	0.00177322	0.0242149	0.0186637	0.0608243	0.0181933	27218.9	27438.9	26901.6	27534.4	33368.4	31994.5	48125	31663.7	0.0322089	0.00235354	0.0123434	0.00238549
291	3	0.00039991	0.000429012	0.000387102	0.000465298	34068	34133.8	34156.4	34159.3	48733	51147.5	43597.1	51045.5	477.68	488.64	437.249	485.682	0.366426	0.895797	0.822828	0.895203	0.944404	0.955885	0.925007	0.955432	1.34083	1.25824	1.84611	1.26351	0.000254713	0.000305038	0.000246794	0.000353964	0.001342	0.00127889	0.00194528	0.00106819	32094.9	32589.5	31569.3	32598.3	46679.4	43575.9	64035.5	43619.8	0.0355557	0.00163476	0.0212575	0.0014831
292	3	0.00199033	0.00230555	0.00178822	0.00271501	30798.9	30824.7	30599.8	30804.3	51608.6	52437.5	46529.5	53205.2	376.73	378.392	351.078	380.893	0.374811	0.904922	0.844719	0.910219	0.958151	0.961905	0.940234	0.965255	1.28061	1.2364	1.78491	1.19968	0.000912633	0.00102675	0.000519813	0.00124586	0.0777436	0.0577416	0.0760644	0.0413466	29506.6	29673.2	28738.3	29767.4	37258	36428.2	55380.9	35865.4	0.0326728	0.00194262	0.0167507	0.00189957
293	3	0.000463639	0.000507473	0.000350519	0.000543949	34760.2	34833.5	34818	34808	49994.8	52483.2	48470.2	51933.6	413.735	421.728	397.976	419.5	0.37082	0.906531	0.862594	0.903062	0.949819	0.961508	0.948136	0.958929	1.2729	1.20025	1.58095	1.2142	0.000294102	0.000416895	0.000181443	0.000399765	0.0014563	0.00156597	0.00238016	0.00112229	32989	33518.7	33067	33393.1	44340.5	41682.7	55663.3	42248.9	0.0273378	0.000440645	0.00864875	0.000544662
294	3	6.33973e-05	8.02469e-05	8.24656e-05	8.01086e-05	31508.7	31480.5	31322.9	31530.4	53315.8	54849.3	49470.7	54956.8	363.192	367.262	348.039	367.801	0.380326	0.922438	0.871391	0.923344	0.965142	0.971983	0.952405	0.972393	1.17649	1.13189	1.54014	1.12698	4.88656e-05	7.8941e-05	8.0243e-05	7.87584e-05	0.00012293	8.62742e-05	0.000104021	8.62998e-05	30477.7	30613.6	29836.5	30709.7	37609.6	35573.5	50517.9	35296.7	0.0318113	0.00109296	0.0166352	0.00130295
295	3	0.000445342	0.000694722	0.000706998	0.000678548	30518.5	30566.8	30683.8	30573.4	51143.5	53523.4	49348	53282.2	468.557	477.317	457.709	475.515	0.374277	0.913906	0.873313	0.912594	0.955156	0.966099	0.950633	0.964908	1.23495	1.16707	1.45871	1.16995	0.000329312	0.000603577	0.000597522	0.00057439	0.0040375	0.00106047	0.00115638	0.00109627	29133.8	29553.4	29232.6	29527.4	37657.1	35550.9	43703.3	35624.3	0.0263437	0.000628699	0.00690919	0.000415242
296	3	0.000513222	0.000730084	0.000700155	0.000692091	32410.9	32212.2	31987.6	32242.4	48416.2	51095.9	46029.4	51750.3	487.317	493.367	463.944	495.64	0.365384	0.897	0.843734	0.901422	0.942874	0.955184	0.936565	0.958232	1.34914	1.24355	1.71703	1.22459	0.000319854	0.000617635	0.000486786	0.000579091	0.00268885	0.0016114	0.00165096	0.00184541	30661.8	30776.1	29895.7	30925.3	42621.2	40003.3	56882.4	39330.8	0.0284313	0.00155353	0.00724191	0.00130082
297	3	0.000283332	0.000383407	0.000401324	0.000366014	24374.4	24385.8	24457.8	24388.9	53110.3	54255	48923.7	54444.2	597.455	601.56	562.352	601.752	0.380124	0.919453	0.872375	0.920453	0.963955	0.969162	0.947908	0.970057	1.16903	1.1409	1.43036	1.13796	0.000175657	0.00033094	0.000355923	0.000300876	0.000907793	0.000594068	0.000673282	0.000627419	23500.5	23646.2	23237.8	23671.5	28477.4	27767.9	34600.3	27674.4	0.0372954	0.00153792	0.0197498	0.00156147
298	3	0.0029987	0.0033241	0.00172993	0.00344807	28374.3	28395.8	28136.9	28371.6	55915.6	56396	47599.9	56174.6	269.613	270.528	246.116	270.206	0.386263	0.930969	0.850562	0.929172	0.977248	0.979045	0.946373	0.978185	1.12941	1.10674	1.86744	1.1146	0.00166412	0.002027	0.000737311	0.00209789	0.0274925	0.0232422	0.0630587	0.0215391	27710.1	27779.4	26673.4	27727.6	32212.3	31437.4	63272.8	31865.7	0.0436079	0.000711328	0.035622	0.000947265
299	3	0.000456365	0.000710773	0.000699886	0.000715473	25811	25860.9	25686.6	25840	50534.6	53550.4	48129.5	53115.2	450.644	464.165	436.646	461.365	0.370632	0.912531	0.858594	0.909297	0.95385	0.966696	0.947218	0.964847	1.31989	1.18849	1.7323	1.19921	0.000327654	0.000468739	0.000424082	0.000472228	0.0110865	0.00283284	0.00317042	0.00276972	24632.2	25050.4	24386.9	24975	33706.4	30363.3	49667	30742.1	0.0328882	0.000562566	0.013056	0.000806441
300	3	0.00102927	0.00118529	0.000868854	0.00120427	27389.2	27365.2	26592.4	27395.9	52863.9	54389.8	44592.9	53771.3	308.556	312.982	287.858	311.304	0.377819	0.917203	0.825594	0.913219	0.963934	0.970566	0.932383	0.96782	1.21334	1.16424	2.0207	1.18123	0.000535943	0.000695104	0.000320213	0.000664273	0.00986796	0.00802467	0.0139961	0.00772193	26422.4	26581.4	24578.2	26555.2	33159.9	32003.7	64504.5	32395.3	0.0278846	0.000802123	0.0153266	0.000891954
301	3	0.00096322	0.00114138	0.000757017	0.00103782	27973	27970.4	27721	27974.9	51521.3	53297	47495	53281.5	444.33	449.33	423.783	451.446	0.375456	0.911734	0.85575	0.912109	0.956883	0.965283	0.943404	0.965142	1.22428	1.18048	1.62701	1.18016	0.000398885	0.000569866	0.000370724	0.000584355	0.0110486	0.00868977	0.0226732	0.0119759	26763.4	26996.6	26063.3	26996.1	33980.8	32819.4	46916.6	32724.6	0.0312479	0.00178291	0.0169826	0.00149668
302	3	5.83658e-05	9.27842e-05	9.68151e-05	9.27672e-05	32860.8	32936.7	32780.7	32868.2	48376.5	50890.3	45851.5	51067.3	467.078	476.83	447.319	478.356	0.366191	0.896109	0.839859	0.897062	0.941953	0.954048	0.936609	0.954985	1.32398	1.24437	1.75669	1.24288	4.04777e-05	9.11431e-05	9.46047e-05	9.11797e-05	0.000211842	0.000101371	0.000121682	0.0001011	30932.9	31448.2	30679.2	31372.3	43814.7	40956.7	59343.2	41122.2	0.0275035	0.0014247	0.00682616	0.00152626
303	3	3.14121e-05	3.14619e-05	3.16514e-05	3.14097e-05	36223.3	36229.4	36270.5	36234.9	48521.7	49914.7	44760.3	50743.4	628.298	635.627	577.567	640.41	0.367103	0.890078	0.832219	0.89675	0.942327	0.949265	0.930957	0.952933	1.30807	1.26888	1.84158	1.23467	2.96324e-05	2.9945e-05	2.9596e-05	2.99783e-05	4.06552e-05	3.93614e-05	5.54896e-05	3.84495e-05	34124.3	34380.2	33800.3	34515.4	47584.4	46121.8	67402.6	44822.9	0.0248525	0.00157357	0.0103395	0.00156515
304	3	0.00029511	0.00051384	0.000490134	0.000513712	30947.6	30928.9	29839	30951.8	50260.8	52954.7	47273.9	53009	444.953	454.876	439.824	455.185	0.370332	0.907234	0.851953	0.9075	0.952201	0.964514	0.943387	0.964791	1.3161	1.22687	1.85236	1.22304	0.000155341	0.000354978	0.000279065	0.000344402	0.00333001	0.00122776	0.00142941	0.00119299	29481.1	29805.4	27873.4	29836.4	46380.1	43153.5	89395.1	42425.2	0.0252502	0.00218456	0.00641677	0.00197179
305	3	0.000430537	0.000515306	0.000368394	0.000496561	27686.1	27665.2	27481.4	27702.7	52065.8	52907.7	45476.1	53317.6	440.49	444.479	412.483	445.67	0.375944	0.907813	0.837344	0.910641	0.960076	0.963903	0.934845	0.965662	1.23006	1.20348	1.84949	1.18869	0.00018415	0.000254081	0.000133387	0.000318458	0.00266024	0.00202134	0.00363163	0.00259834	26557.9	26648.6	25607.1	26737.9	34188.6	33630.6	53395.1	33002.5	0.0266254	0.000378802	0.010212	0.000398773
306	3	0.000292304	0.000512407	0.000545829	0.000531079	28701.2	28718.6	28621.1	28672.5	50713.2	52671.4	46470.4	52270	508.883	518.604	483.586	515.472	0.372682	0.908141	0.848219	0.905609	0.95339	0.962283	0.938342	0.960401	1.25634	1.19176	1.69583	1.20164	0.000163234	0.00043343	0.000460409	0.000464797	0.00262682	0.000830034	0.000903806	0.000797794	27358.7	27646.8	26853.1	27524.7	35973.4	34125.2	50491.4	34561	0.0276857	0.000202937	0.0108744	0.000559406
307	3	0.000320091	0.000365711	0.000420627	0.000369207	25554.9	25571.1	25139.8	25490.7	49494.4	51720.3	42876.4	51072.6	405.121	414.464	375.158	411.406	0.368398	0.900406	0.811578	0.895531	0.948206	0.958302	0.923518	0.955511	1.3175	1.23201	2.11686	1.26004	0.000271349	0.000322797	0.000386707	0.000327236	0.000798058	0.000540882	0.000593711	0.00054123	24299.4	24582.3	23116.8	24381.5	33267.4	31030.2	57076	31925.4	0.0284313	0.00139158	0.00873154	0.00126503
308	3	0.000243492	0.000466412	0.000497618	0.000465487	30537.8	30297.6	29620.6	30451.6	47882.7	51384.3	45374.3	51523.9	427.707	437.136	410.615	438.561	0.362513	0.896453	0.836672	0.897844	0.941216	0.957204	0.934212	0.957712	1.40322	1.25756	1.83148	1.24851	0.000132507	0.000412532	0.000439299	0.00041157	0.00200905	0.000684964	0.000747299	0.000684451	28769.4	28904.2	27326.1	29140.6	42352	38796.5	61755.4	37971.3	0.0237425	0.00103955	0.00126018	0.00101613
309	3	0.000718489	0.00107282	0.000907224	0.00112255	20174.5	20187.8	20287	20174.7	51447.1	52926.9	48324.6	53178.7	605.901	610.329	574.849	610.872	0.375482	0.910438	0.867297	0.912219	0.956372	0.963297	0.94529	0.964392	1.22045	1.18006	1.46392	1.17149	0.000292552	0.000524175	0.000407709	0.000566426	0.0144492	0.00877301	0.0119607	0.00827524	19312.9	19480.6	19259	19483.7	24296.6	23541.1	28823.1	23413.1	0.0311651	0.00108365	0.00917889	0.000884855
310	3	0.000111757	0.000110972	0.000112046	9.37396e-05	15742.7	15771.9	15886	15762.3	49396.9	52024.4	48538.3	52255.2	695.908	708.585	672.409	709.266	0.369486	0.903766	0.868625	0.905406	0.946699	0.95935	0.946448	0.960371	1.28258	1.21163	1.46266	1.20319	0.000107704	0.000107818	0.000107698	7.77566e-05	0.000133146	0.000127455	0.0001488	0.000160922	14923.8	15170.8	15136.6	15175.3	20050.3	18855.6	22376.1	18771.1	0.0253165	0.000929464	0.00253934	0.00105946
311	3	0.000514356	0.00142566	0.00144798	0.00141302	21278.6	21177.3	20799.1	21236.8	48526.6	51179.5	48057.1	52106.7	362.953	369.886	358.887	375.564	0.363796	0.893719	0.857906	0.900984	0.945233	0.95686	0.946997	0.960854	1.6282	1.29711	1.69617	1.25942	0.000173151	0.000375167	0.000340229	0.000344902	0.278027	0.0558702	0.0583974	0.0551111	20168.3	20285.7	19571.5	20464.6	28513	26410.8	37970.1	25480.6	0.0232785	0.00197466	0.00517063	0.0019872
312	3	0.000359193	0.000577486	0.000495135	0.00056077	23449.7	23490.5	23438.8	23516.8	50177.4	52566.2	48356	52483.5	432.054	439.34	413.19	439.621	0.371829	0.908078	0.865766	0.907375	0.95039	0.96163	0.946183	0.961285	1.25681	1.18943	1.50604	1.19224	0.000131005	0.000332623	0.000310673	0.000331499	0.00559093	0.00325542	0.00573601	0.00360234	22236.7	22562.9	22163.1	22594.1	29740.4	28060.6	36081.2	28035.7	0.0259461	0.00015533	0.00692565	0.000309127
313	3	0.000773082	0.000815217	0.000509693	0.000904325	24807.8	24761.5	24566.6	24807.4	52757.5	53875.6	46710.2	53846.7	371.586	374.227	344.975	373.921	0.378145	0.914641	0.847844	0.914719	0.963075	0.968119	0.940497	0.967874	1.20889	1.17433	1.76949	1.16928	0.000567464	0.000600316	0.000292641	0.000723491	0.00271645	0.00232503	0.00643138	0.00200976	23883.5	23912.7	23053.2	23964.8	30998.1	29861	51200.9	29554	0.0281331	0.00153977	0.0152103	0.00168795
314	3	0.00105852	0.00146023	0.00113585	0.00139099	27786.7	27822.1	27952.3	27813.1	52639.9	53652.9	48734.1	54189.1	420.933	424.951	403.187	426.427	0.377956	0.914203	0.865031	0.918047	0.962446	0.966788	0.949165	0.969106	1.21053	1.16679	1.55706	1.1503	0.00061532	0.000850425	0.000394867	0.000719762	0.0189098	0.0067307	0.00994039	0.00665827	26754.6	26950.9	26676.1	26999.9	33107.1	32154	42807.5	31718.8	0.0296242	0.00109463	0.0127576	0.00108179
315	3	0.000653863	0.0010615	0.0011041	0.0011301	23538.1	23521.2	23534.3	23531.8	52065.6	53411.1	49680.4	53344.3	481.178	484.912	463.848	484.394	0.376432	0.912422	0.875687	0.912141	0.959837	0.96586	0.952226	0.965488	1.24026	1.18041	1.44262	1.17954	0.000337281	0.000485277	0.000559007	0.000539143	0.0415242	0.0167915	0.0184335	0.0157007	22586.9	22716.6	22438.4	22725.9	28309	27521.1	33953.4	27486.1	0.0243721	0.0003465	0.00613085	0.000279526
316	3	0.000577173	0.00105054	0.000952867	0.00106601	25744.6	25727.9	25527.2	25726.6	54868.2	55232.8	48799.1	55486.5	407.609	408.518	386.94	408.972	0.384049	0.924594	0.868516	0.926016	0.972365	0.973759	0.948375	0.974903	1.14599	1.12536	1.49929	1.12009	0.000170041	0.000468397	0.000413787	0.00049029	0.018593	0.00866188	0.0132291	0.00824321	25050.7	25073.6	24173	25098.1	28998.1	28746.8	40098	28607.3	0.0365332	0.000920213	0.0236431	0.000667947
317	3	0.000329704	0.000326689	0.00022805	0.000395067	16867.6	16900.5	16999.8	16894.3	51748.3	53253.3	47809.3	53426.8	574.176	580.172	540.679	581.463	0.376296	0.912375	0.861453	0.913813	0.957778	0.964821	0.943599	0.965501	1.20992	1.17246	1.53255	1.16415	0.000165228	0.000164261	9.99637e-05	0.000205368	0.00408216	0.00407405	0.0075021	0.00307468	16152	16324.5	16106.9	16329.7	20398.4	19677.4	25275.8	19578.1	0.0287295	0.00135413	0.00757176	0.00116454
318	3	0.000552728	0.000962307	0.000820593	0.00104942	22308.3	22356.3	22372.1	22330.2	49750.4	51815.6	46081.9	51949.2	517.969	526.235	490.61	526.087	0.369277	0.900484	0.842281	0.901609	0.949484	0.959084	0.937734	0.959605	1.33224	1.25662	1.80091	1.24548	0.000130675	0.000332081	0.000334553	0.000358859	0.059409	0.045278	0.079558	0.0394296	21183.7	21482	21059.2	21457.7	28455.1	26917.6	39006.7	26874.1	0.031016	0.0018528	0.0119464	0.00189854
319	3	0.000442659	0.000626292	0.000595459	0.000630272	24707.3	24689	24547.2	24734.2	50924.4	53080.4	46584.3	52004	417.499	423.459	396.023	420.216	0.373008	0.910844	0.847656	0.90325	0.95459	0.964126	0.939439	0.959359	1.25689	1.18022	1.69958	1.21547	0.000148463	0.00032673	0.000317243	0.000409582	0.00672737	0.00458109	0.00560695	0.00545347	23601.7	23806.6	23008.2	23747.7	31080.7	29186.6	43270.2	29868.3	0.0252668	0.00172707	0.00768859	0.00165686
320	3	0.000618331	0.000783435	0.000700831	0.000957725	19471.3	19503.9	19642	19511.8	50102.4	51921.7	49734.4	51968.8	526.341	532.483	512.443	533.698	0.371439	0.902484	0.874437	0.903016	0.950274	0.959134	0.953064	0.959236	1.27681	1.22876	1.46276	1.21963	0.000170319	0.00029419	0.00025264	0.00034983	0.0306969	0.0248515	0.0286244	0.018362	18531.5	18762.3	18840.2	18783.1	24132.4	23237.2	27171.3	23160.5	0.0249851	0.00111261	0.00260129	0.00125029
321	3	0.00475074	0.00485926	0.00298814	0.00460172	32891.9	33185.4	32112	33278.6	45975.7	47001.1	41985.2	47452	282.128	287.058	268.913	286.931	0.336504	0.818625	0.760406	0.820312	0.953983	0.956782	0.940219	0.959497	7.31101	3.99958	5.75396	3.97531	0.00393384	0.00392949	0.00160527	0.00381206	0.0194783	0.0162142	0.0491403	0.0213256	31132.3	31153	29423.1	31322.9	964646	452126	602283	440567	0.0286964	0.00280084	0.0122441	0.0026979
[truncated: 104 more columns]
